# Supplementary material for: Visible-Light Photocatalytic Functionalization of Isocyanides for the Synthesis of Secondary Amides and Ketene Aminals
Source: PubMed Central journal article supplement (PMC8015228; doi:10.1021/acs.joc.0c01946), 2020-10-19

## SUPPLEMENTARY INFORMATION

### Visible-Light Photocatalytic Functionalization of Isocyanides for the Synthesis of Secondary Amides and Ketene Aminals

Rolando Cannalire,<sup>[a]</sup> Jussara Amato,<sup>[a]</sup> Vincenzo Summa,<sup>[a]</sup> Ettore Novellino,<sup>[a]</sup> Gian Cesare Tron,<sup>[b]</sup> and Mariateresa Giustiniano\*<sup>[a]</sup>

[a] *Department of Pharmacy, University of Naples Federico II, via D. Montesano 49, 80131, Napoli, Italy*

[b] *Department of Pharmaceutical Sciences, University of Piemonte Orientale, Largo Donegani 2, 28100, Novara, Italy*

#### Contents:

|                                                        |    |
|--------------------------------------------------------|----|
| - HRMS spectra for control experiments                 | S2 |
| - Copies of <sup>1</sup> H and <sup>13</sup> C spectra | S4 |

## HRMS spectra for control experiments

RC\_43 #1 RT: 0.01 AV: 1 NL: 2.77E9  
T: FTMS + p ESI Full ms [150.0000-350.0000]

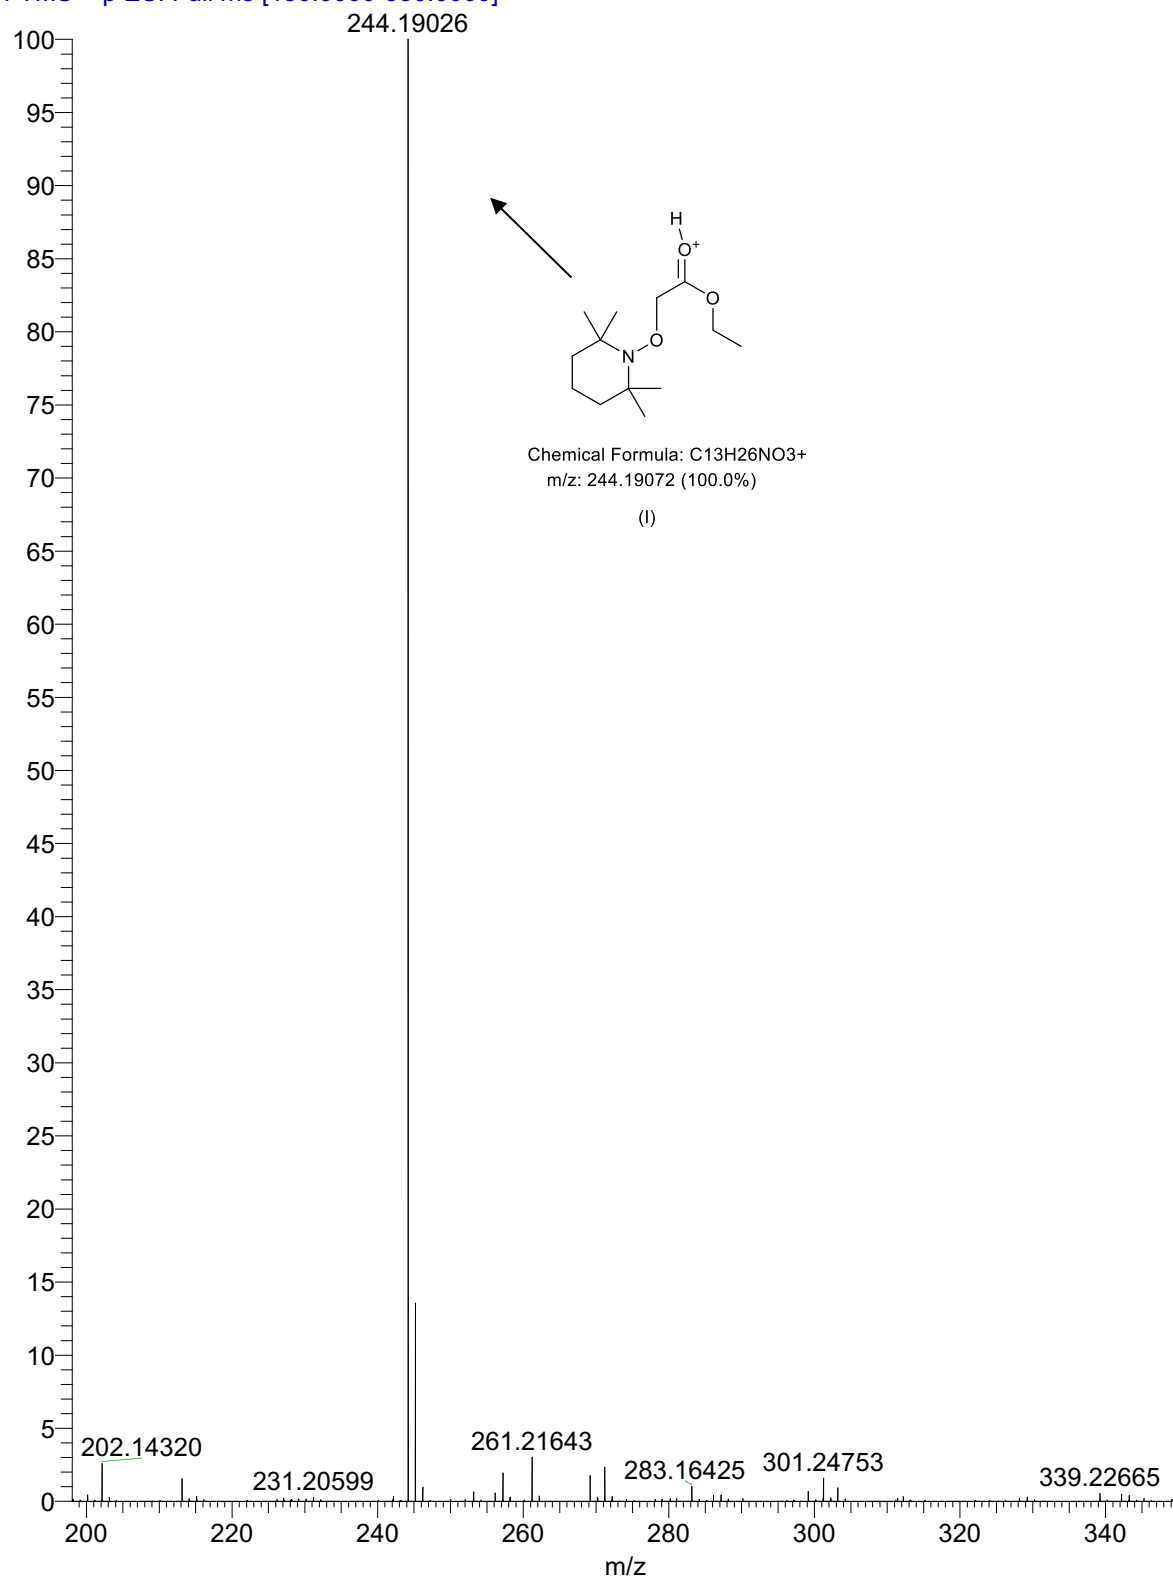

**Figure S1.** TEMPO adduct with an alkyl radical intermediate.



RC\_43 #1 RT: 0.01 AV: 1 NL: 7.14E5  
T: FTMS + p ESI Full ms [150.0000-350.0000]

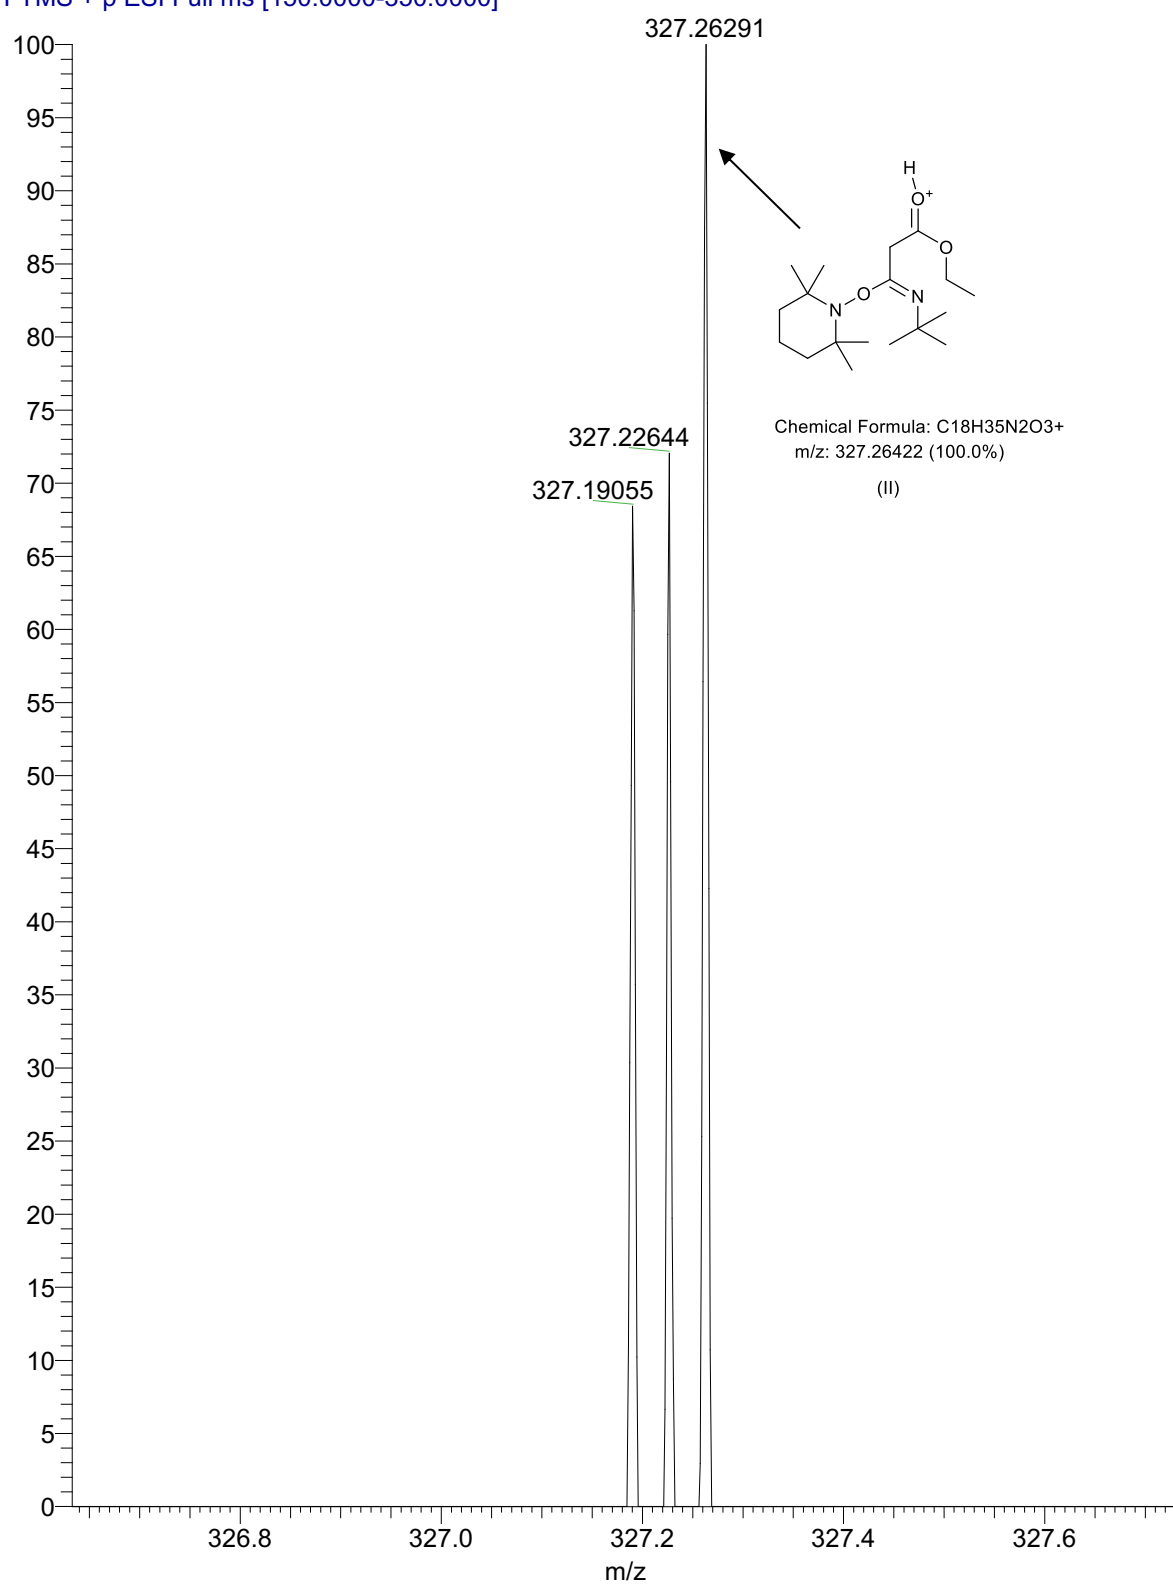

Figure S2. TEMPO adduct with an imidoyl radical intermediate.

The NMR data of known compounds (**3**, **4**, **5**, **7**, **8**, **9**, **12**, **15**, **17**, **18**, **21**, **22**, **23**, **25**, **26** and **29**) are consistent to literature data.<sup>1-15</sup>

### References

- 1 S. Rohe, T. McCallum, A. O. Morris and L. Barriault, *J. Org. Chem.*, 2018, **83**, 10015–10024.
- 2 Z. W. Wicks and K.-J. Wu, *J. Org. Chem.*, 2002, **45**, 2446–2448.
- 3 1992 P. Jakobsen, A. Kanstrup, Lundbeck, M. Jane, WO Pat. 9201672 A1 19920206, .
- 4 R. K. Rapolu, B. Nabamukul, S. R. Bommineni, R. Potham, N. Mulakayala and S. Oruganti, *RSC Adv.*, 2013, **3**, 5332–5337.
- 5 S. Sumino, A. Fusano, T. Fukuyama and I. Ryu, *Synlett*, 2012, **23**, 1331–1334.
- 6 WO 2009117659 A1 20090924, 2009.
- 7 S. Pelliccia, A. I. Alfano, P. Luciano, E. Novellino, A. Massarotti, G. C. Tron, D. Ravelli and M. Giustiniano, *J. Org. Chem.*, 2020, **85**, 1981–1990.
- 8 H. Stamm and L. Schneider, *Chem. Ber.*, 1975, **108**, 500–510.
- 9 A. P. Gurevich, A. I.; Kolosov, M. N.; Konnova, G. S.; Nametkina, L. N.; Prudnikova, *Zhurnal Org. Khimii*, 1969, **5**, 1766–1771.
- 10 Z. W. Wicks and P. P. Patel, *J. Org. Chem.*, 1981, **46**, 4068–4069.
- 11 D. J. Woodman and A. I. Davidson, *J. Org. Chem.*, 1973, **38**, 4288–4295.
- 12 J. K. Vandavasi, C.-T. Hsiao, W.-P. Hu, S. S. K. Boominathan and J.-J. Wang, *European J. Org. Chem.*, 2015, **2015**, 3171–3177.
- 13 A. G. Neo, J. Delgado, C. Polo, S. Marcaccini and C. F. Marcos, *Tetrahedron Lett.*, 2005, **46**, 23–26.
- 14 T. Nishio and H. Yamamoto, *J. Heterocycl. Chem.*, 1995, **32**, 883–891.
- 15 H.-R. Müller and M. Seefelder, *Justus Liebigs Ann. Chem.*, 1969, **728**, 88–98.

<sup>1</sup>H NMR  
400 MHz, CDCl<sub>3</sub>

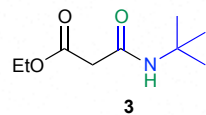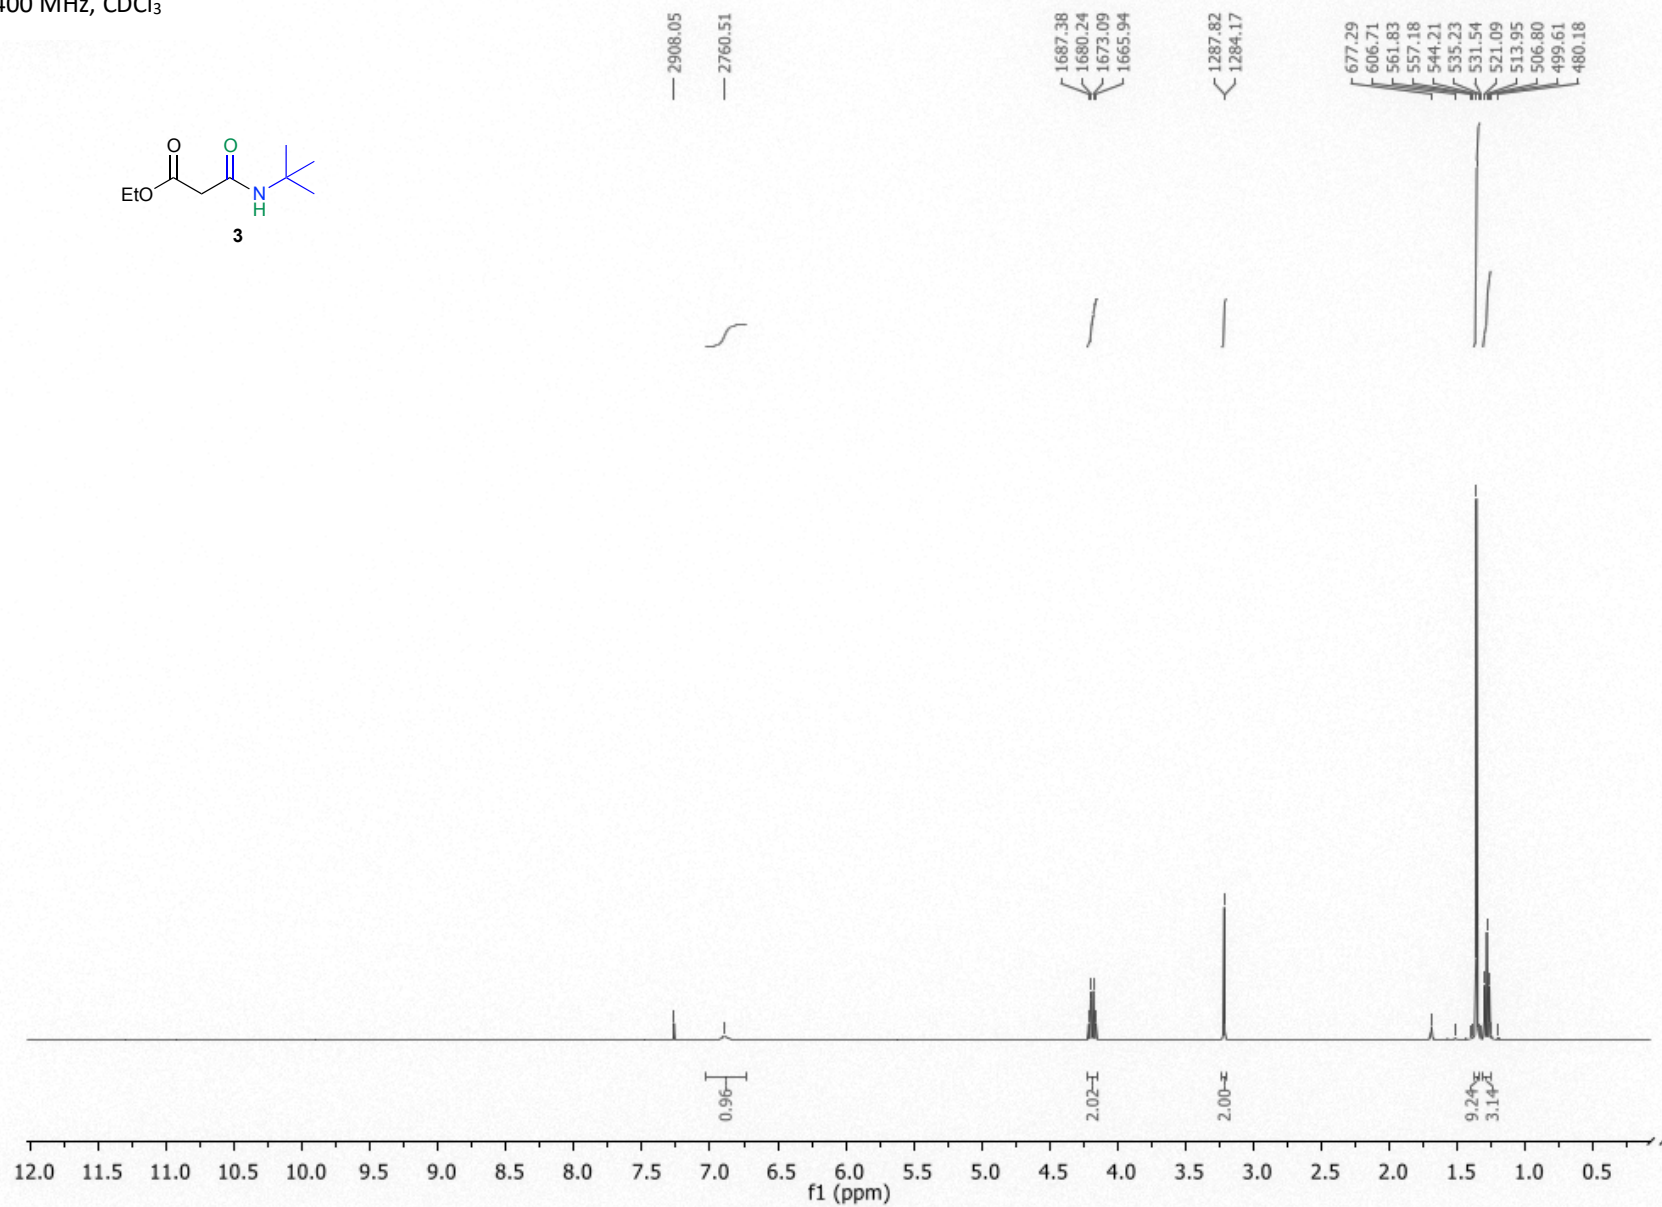

<sup>13</sup>C NMR  
100 MHz, CDCl<sub>3</sub>

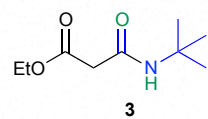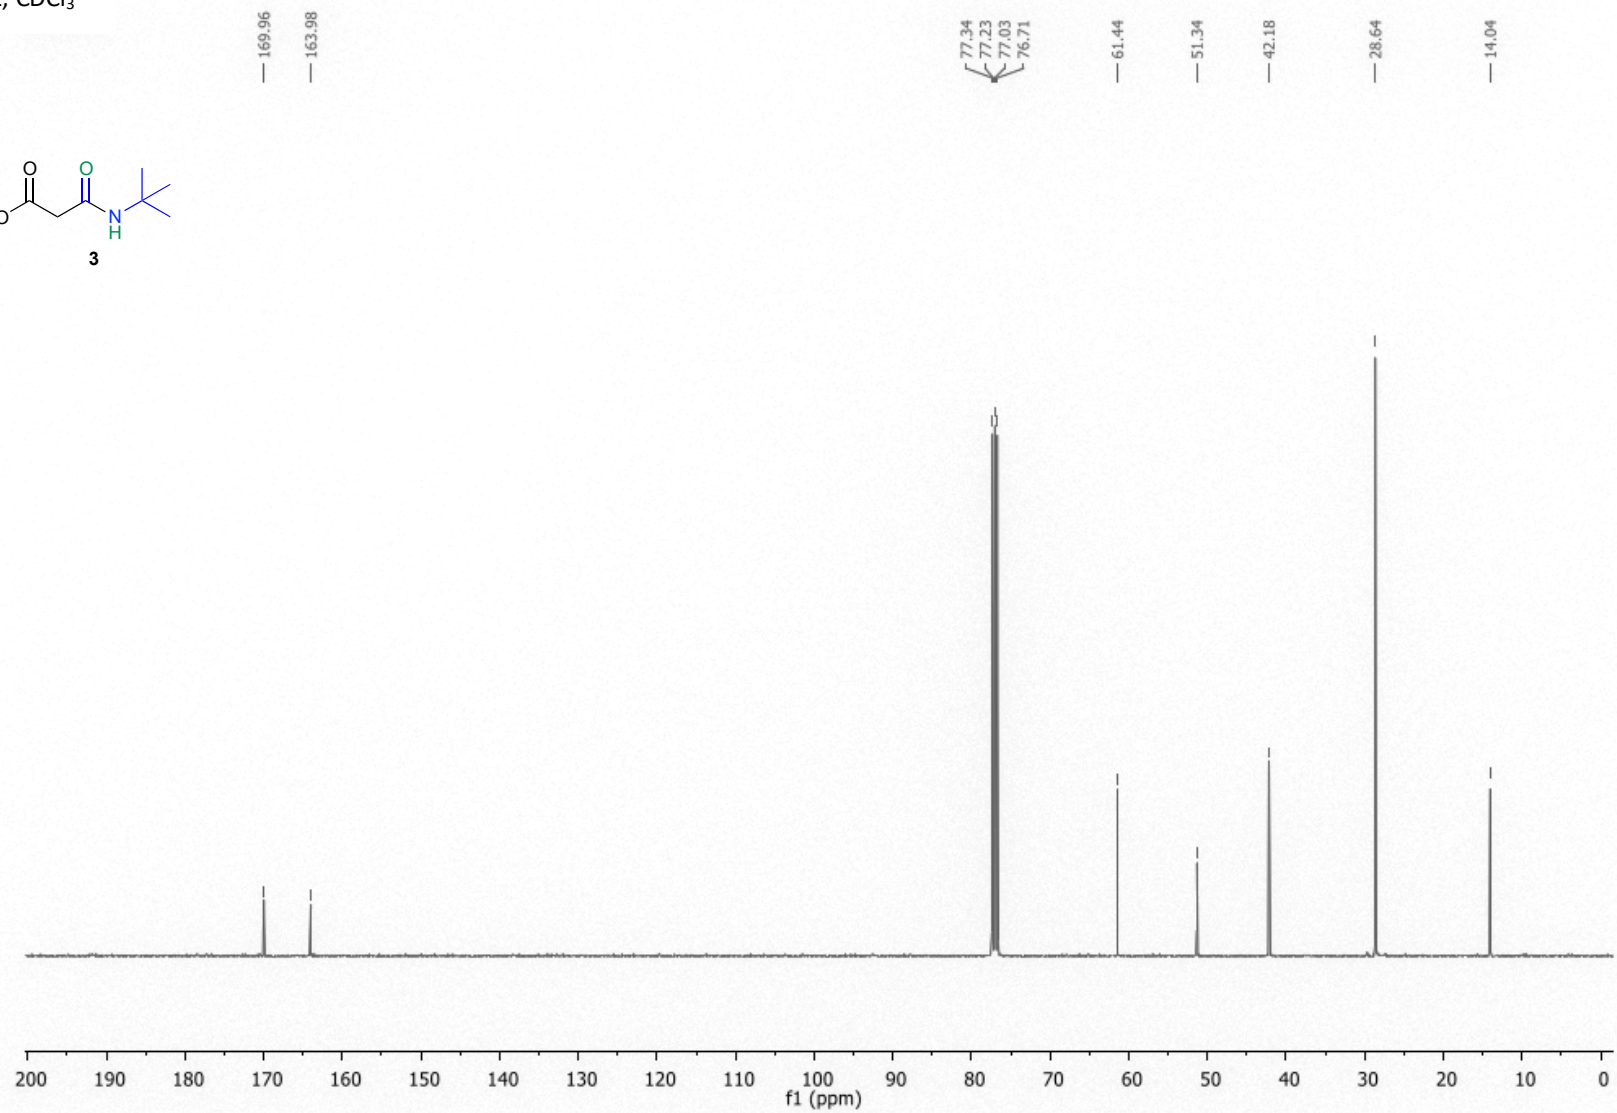

<sup>1</sup>H NMR  
400 MHz, CDCl<sub>3</sub>

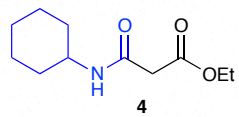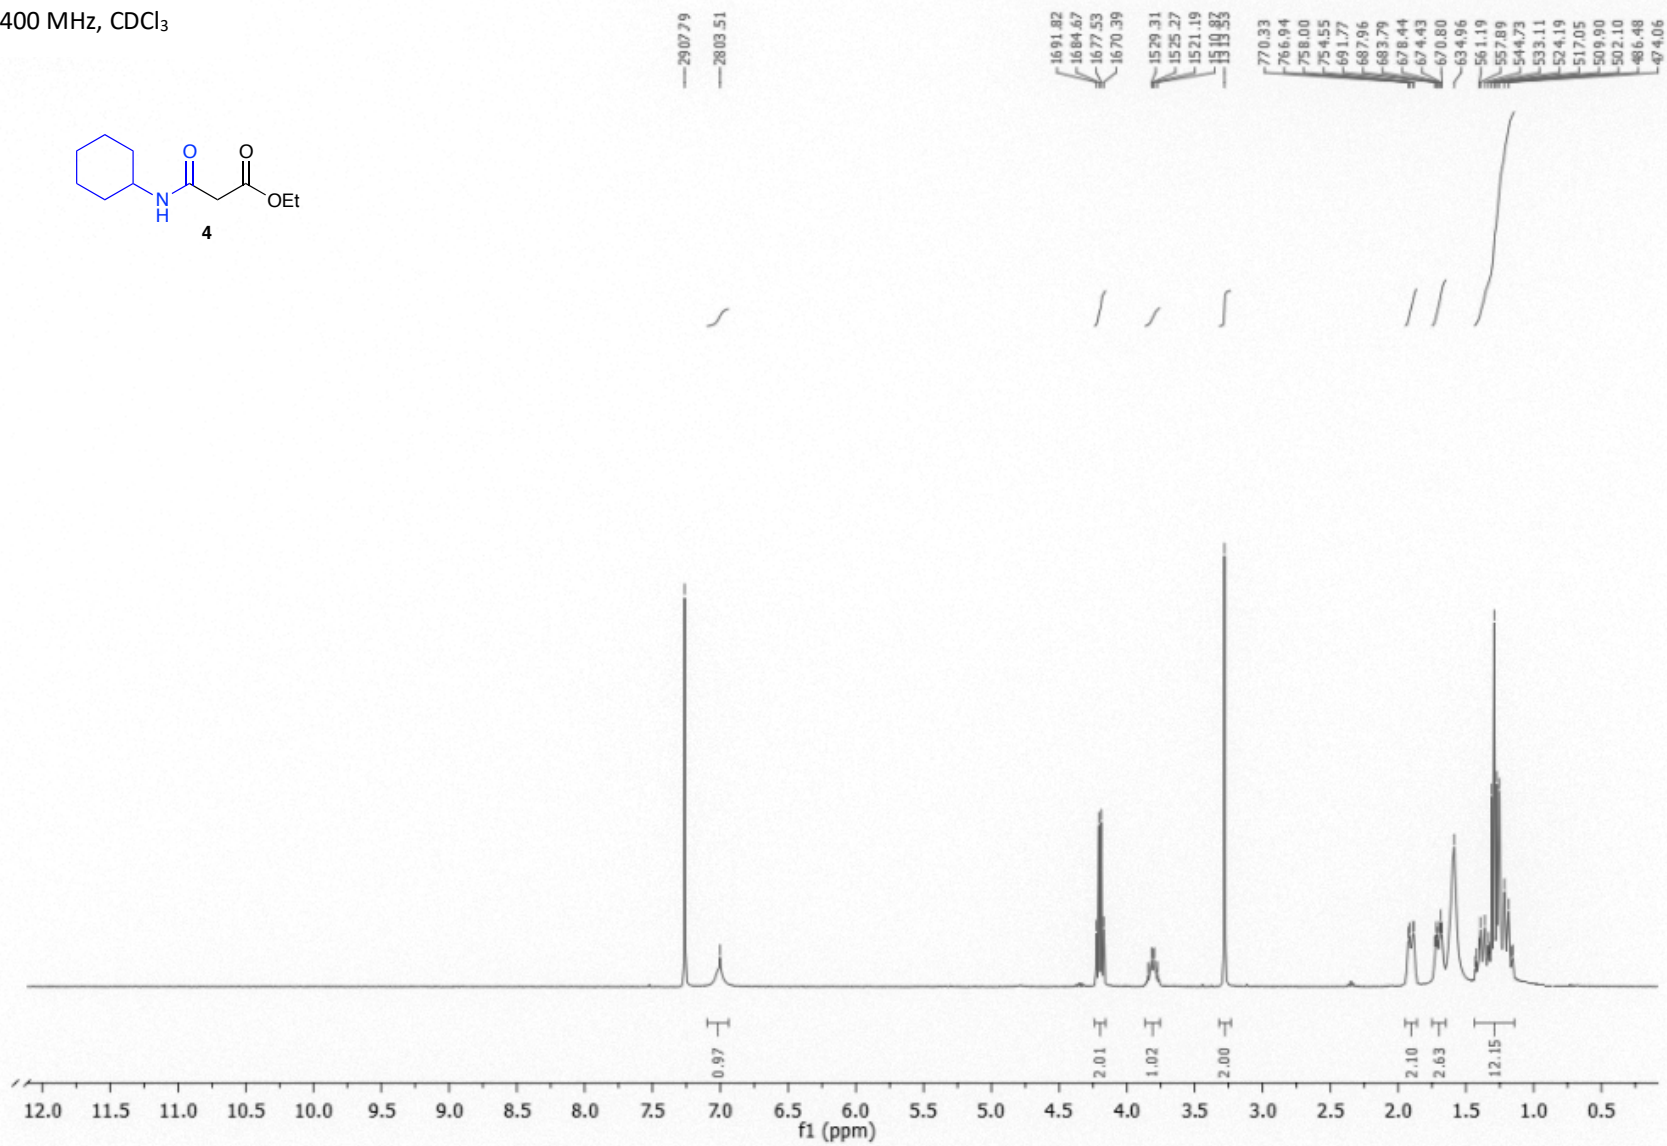



<sup>13</sup>C NMR  
100 MHz, CDCl<sub>3</sub>

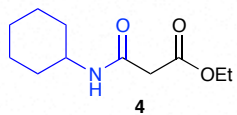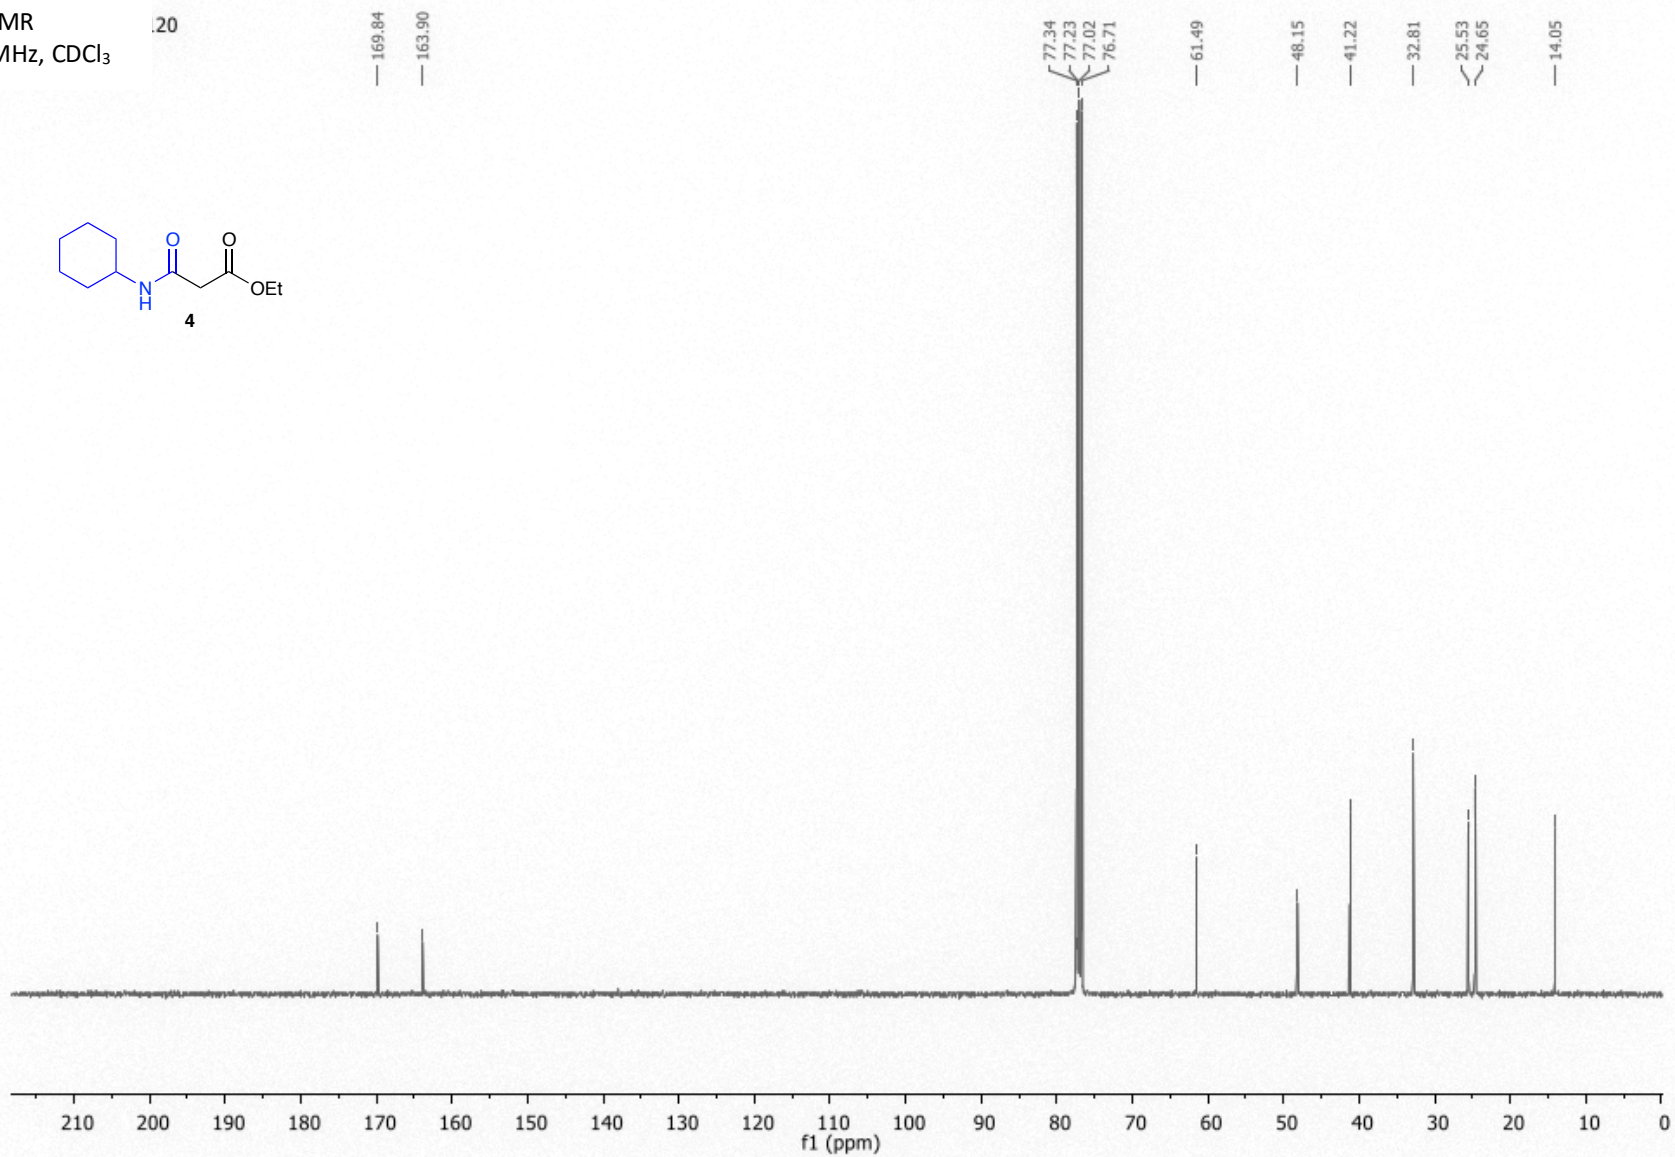

<sup>1</sup>H NMR  
400 MHz, CDCl<sub>3</sub>

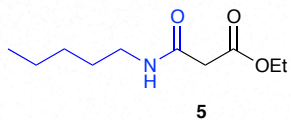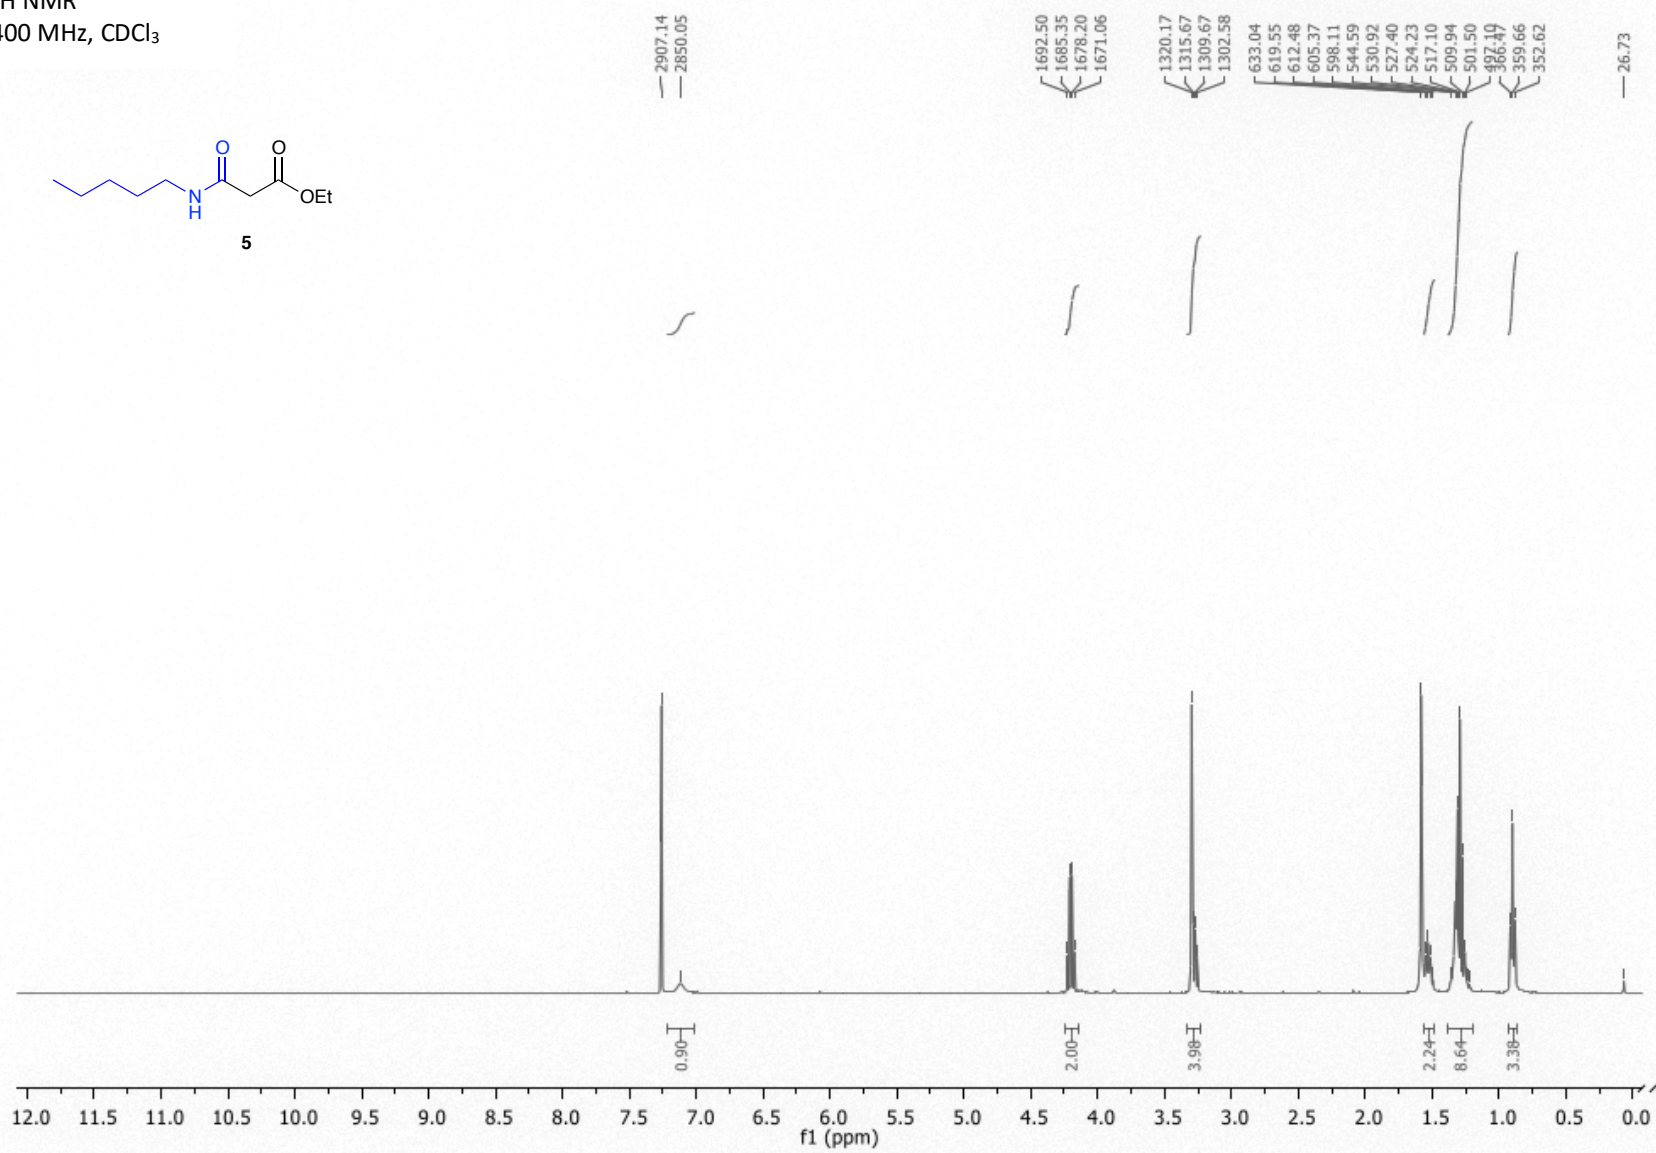

<sup>13</sup>C NMR  
100 MHz, CDCl<sub>3</sub>

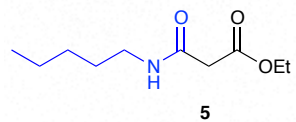

— 169.88  
— 164.80

77.33  
77.22  
77.02  
76.70

— 61.55

41.04  
39.58

— 29.05

— 22.33

14.05  
13.97

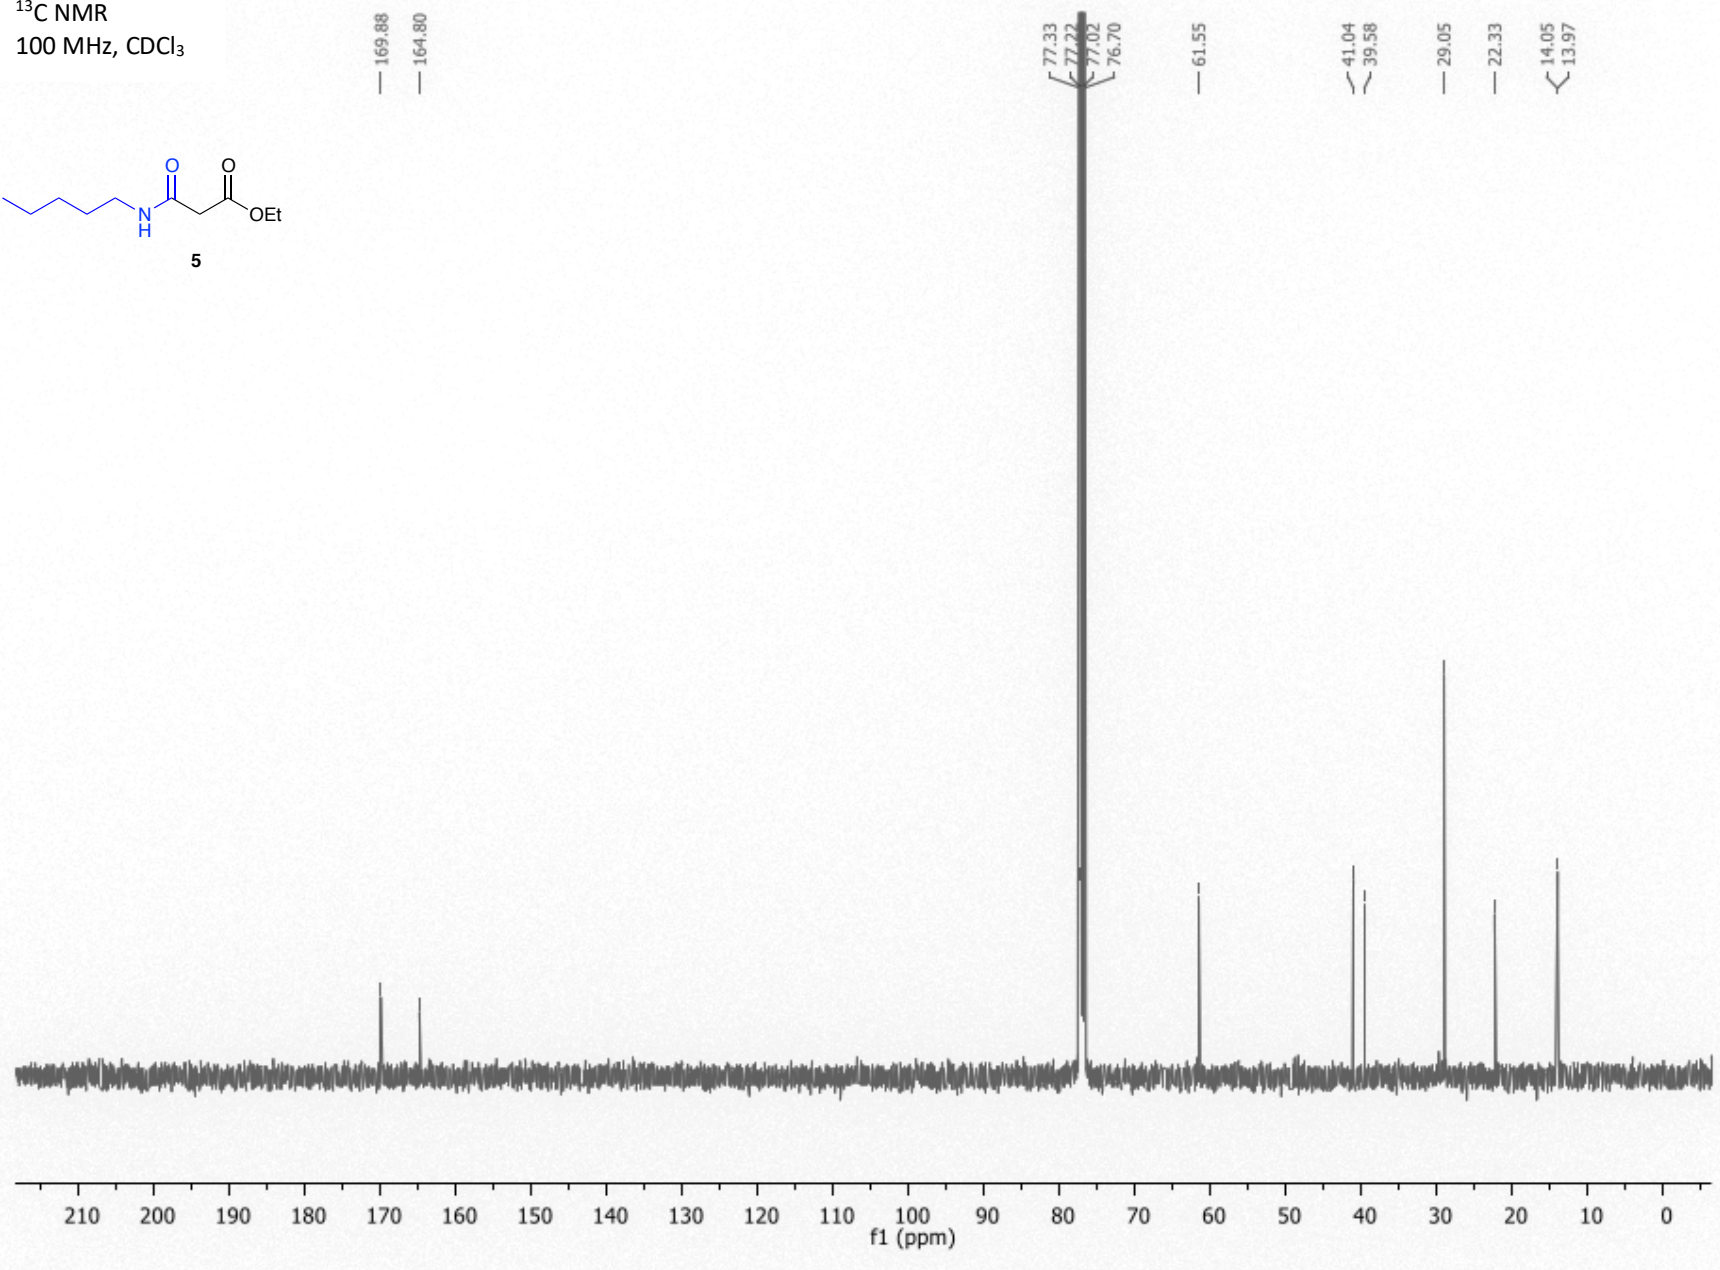



<sup>1</sup>H NMR  
400 MHz, CDCl<sub>3</sub>

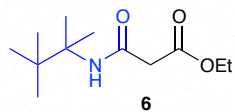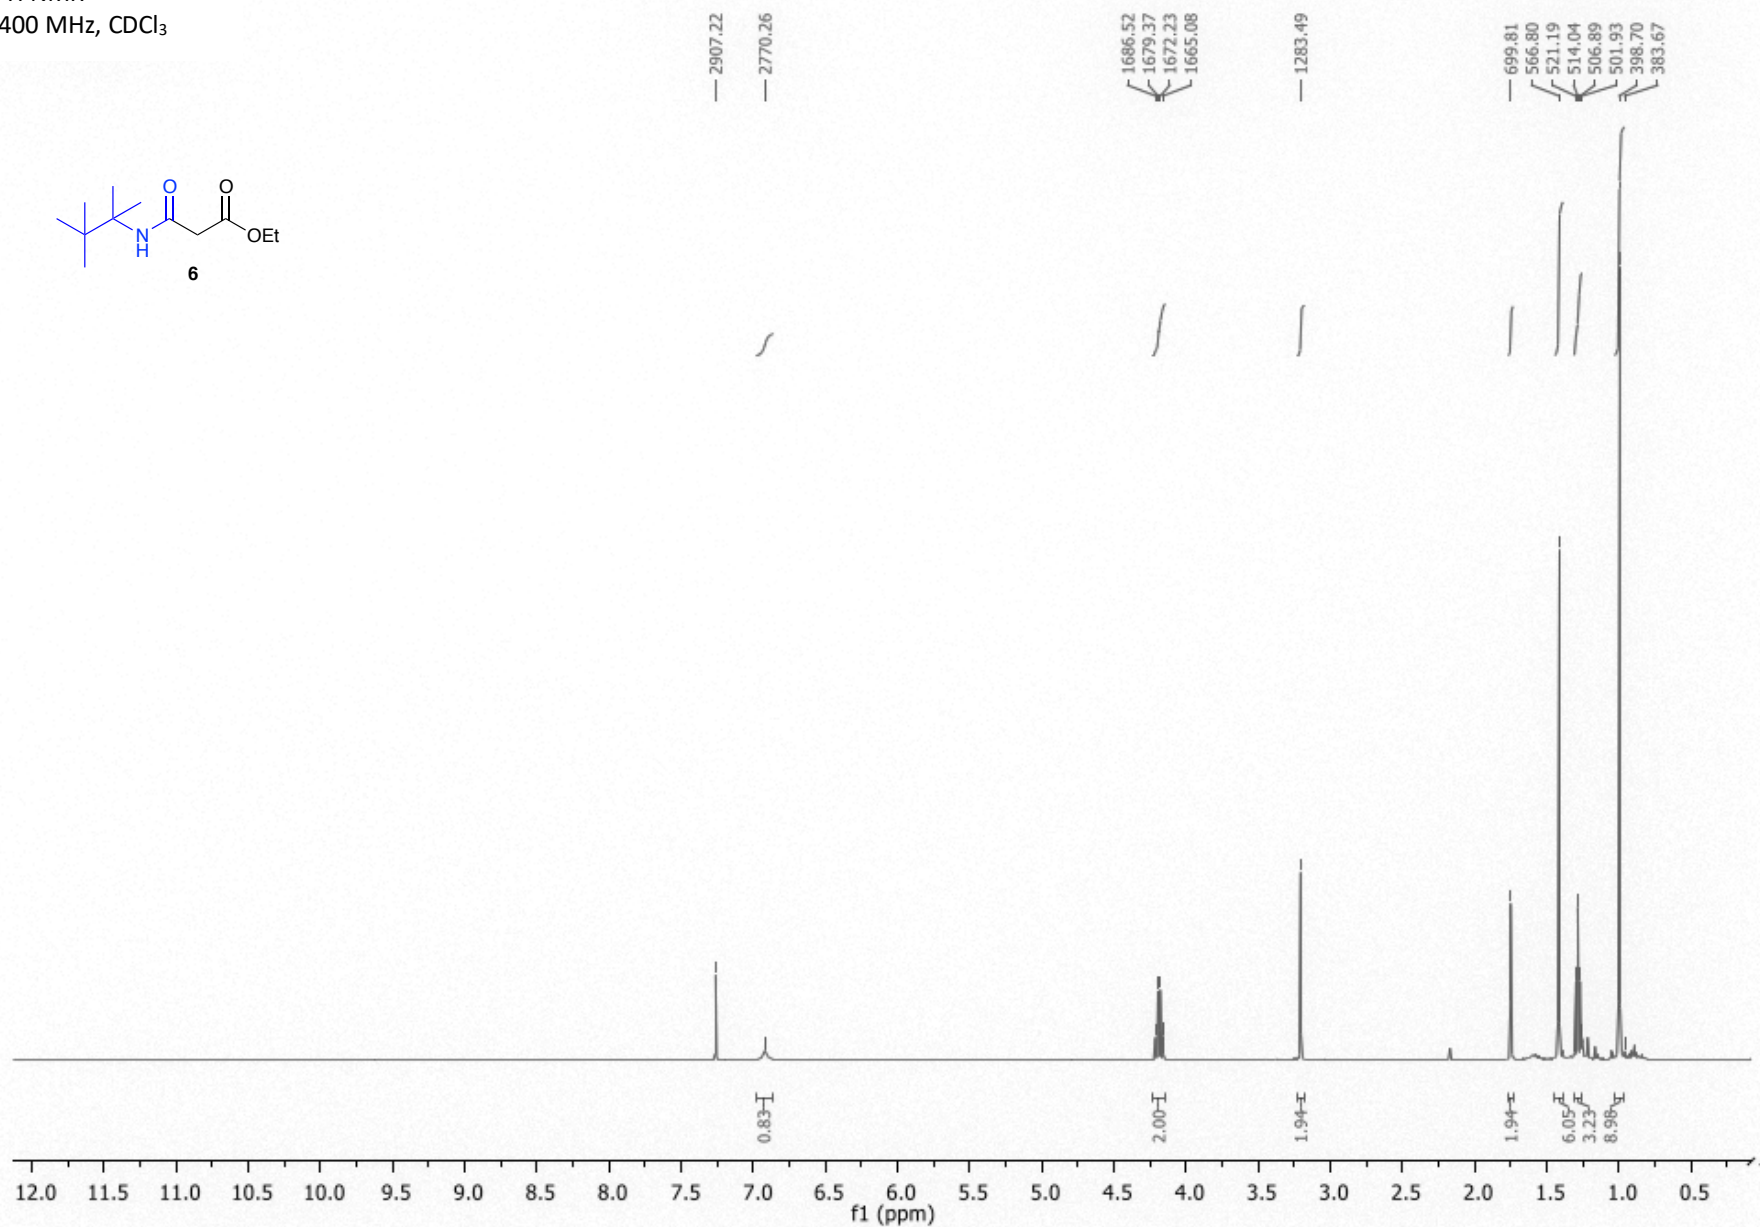

$^{13}\text{C}$  NMR  
100 MHz,  $\text{CDCl}_3$

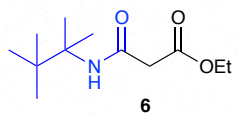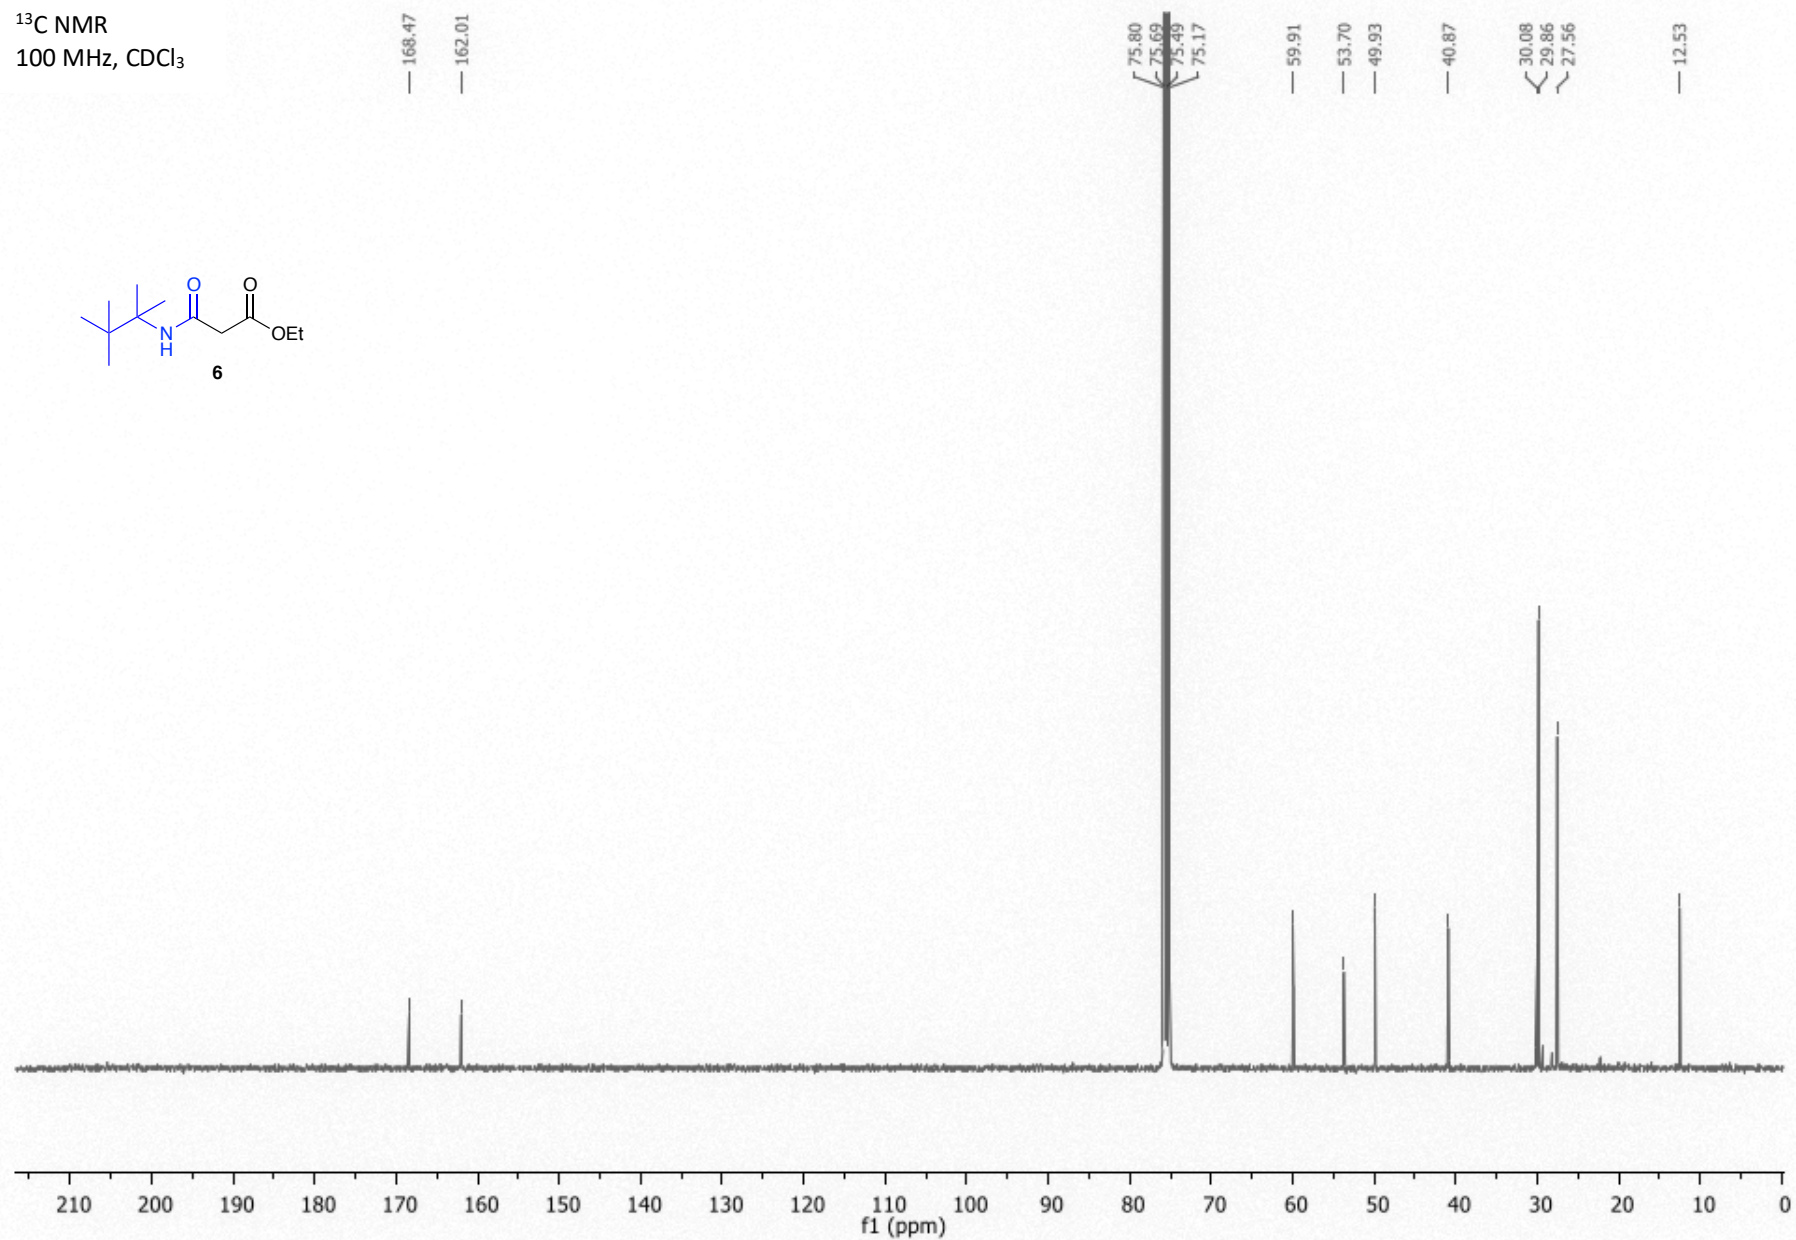

<sup>1</sup>H NMR  
400 MHz, CDCl<sub>3</sub>

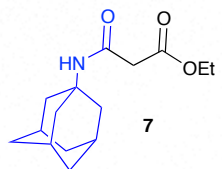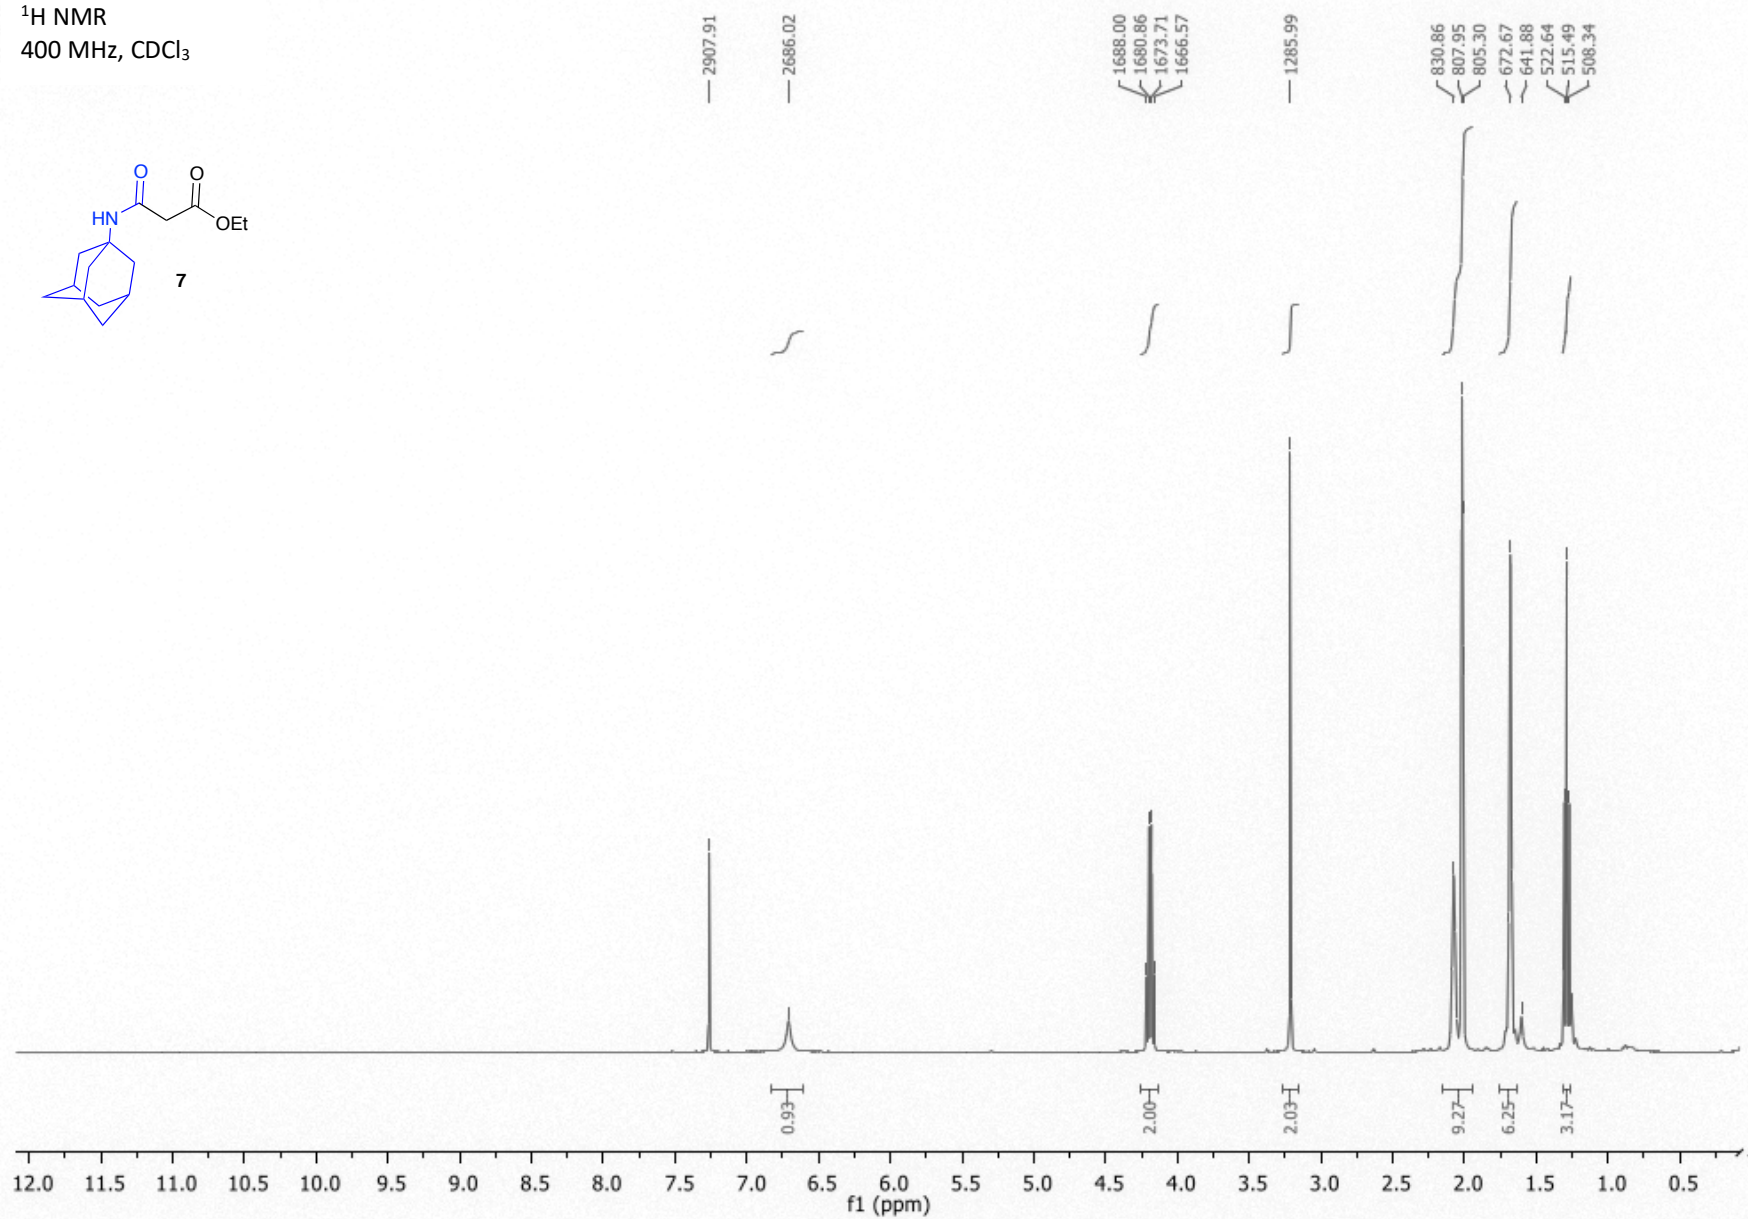



<sup>13</sup>C NMR  
100 MHz, CDCl<sub>3</sub>

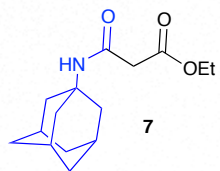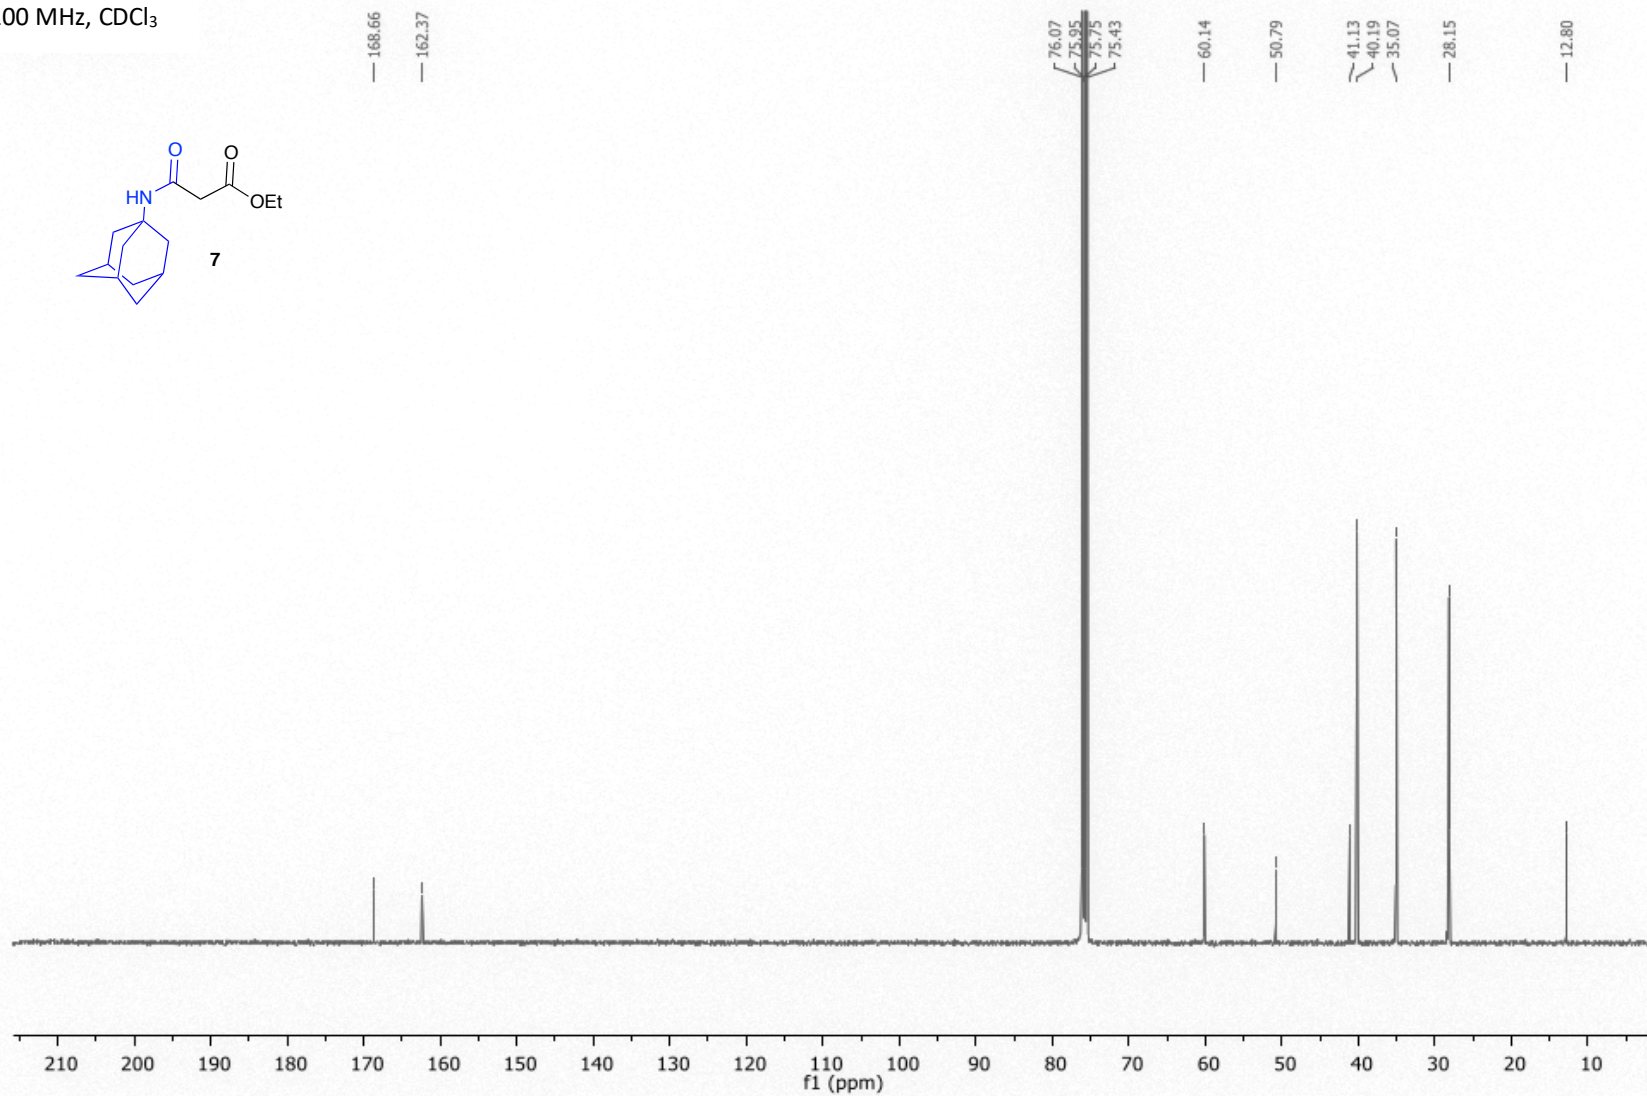

<sup>1</sup>H NMR  
400 MHz, CDCl<sub>3</sub>

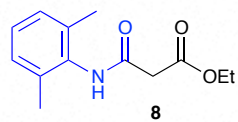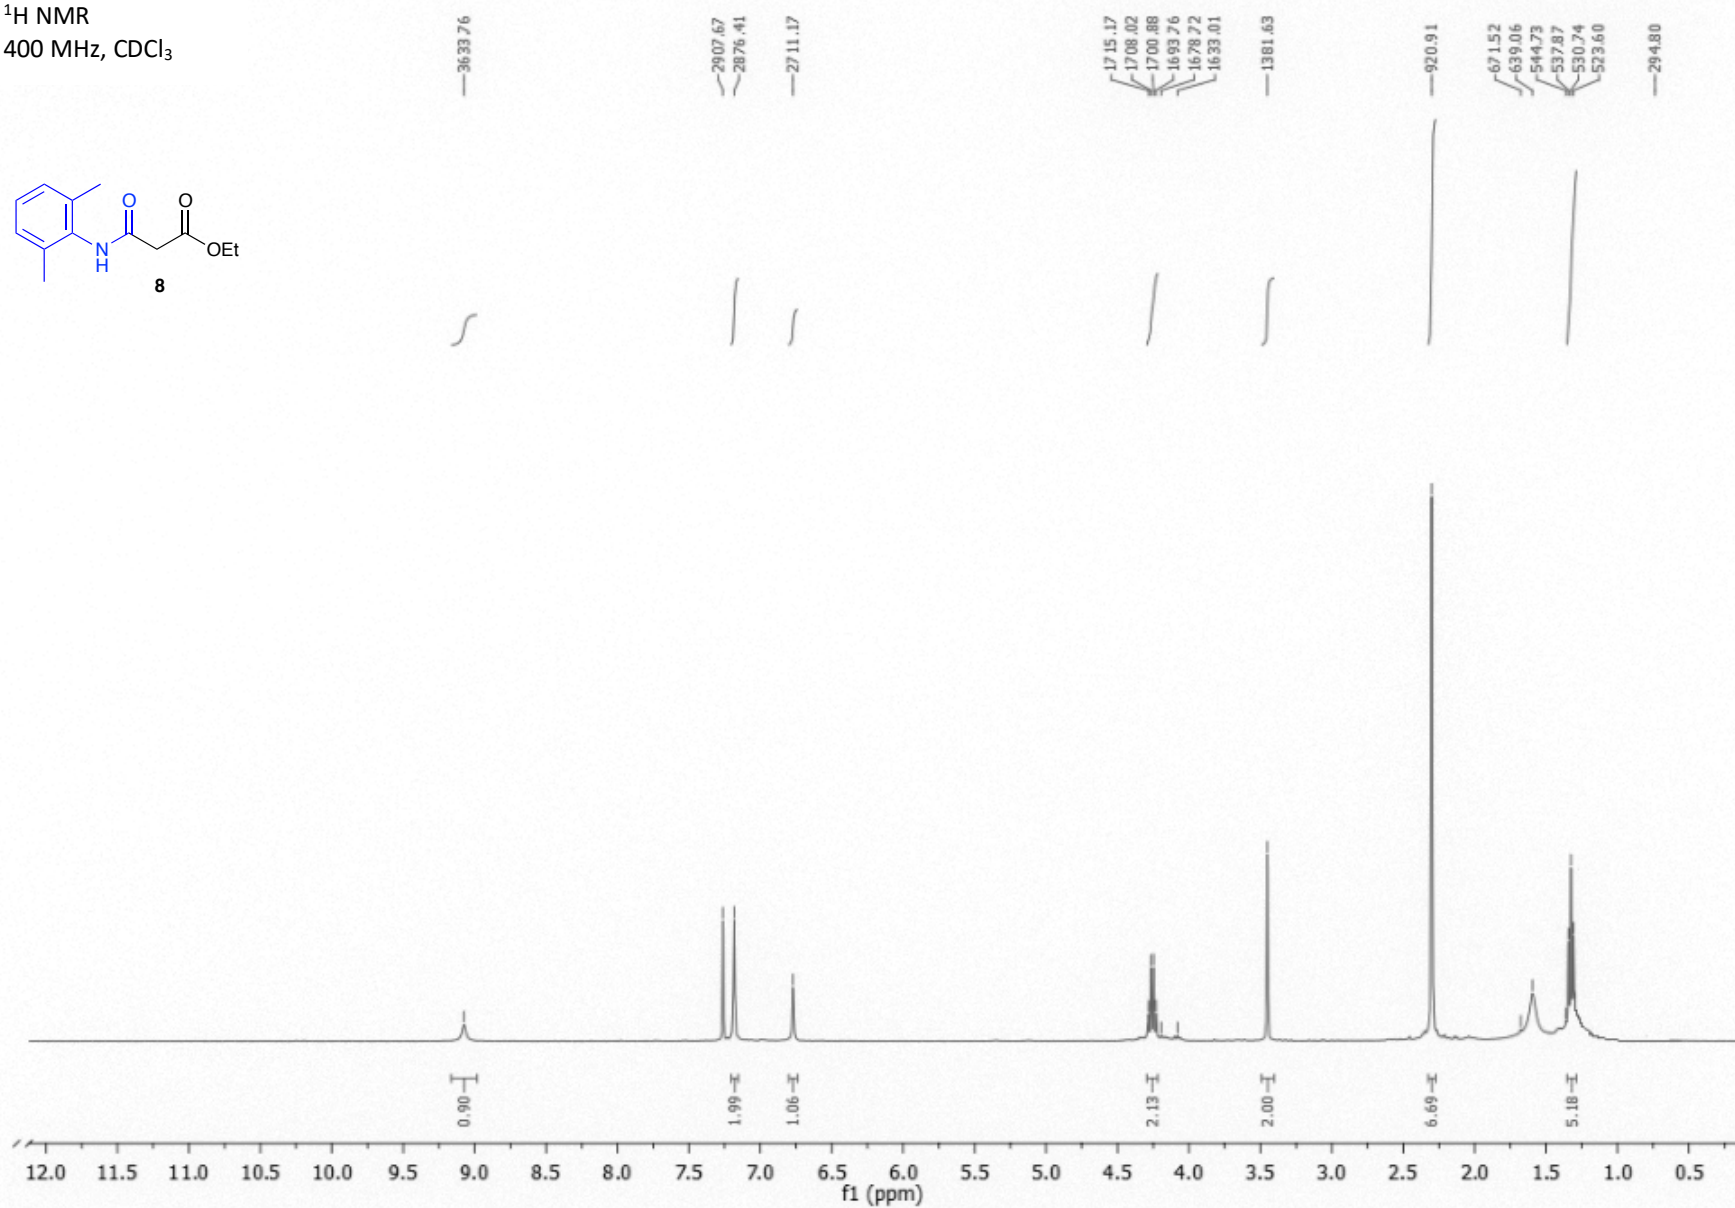

<sup>13</sup>C NMR  
100 MHz, CDCl<sub>3</sub>

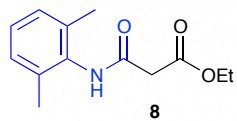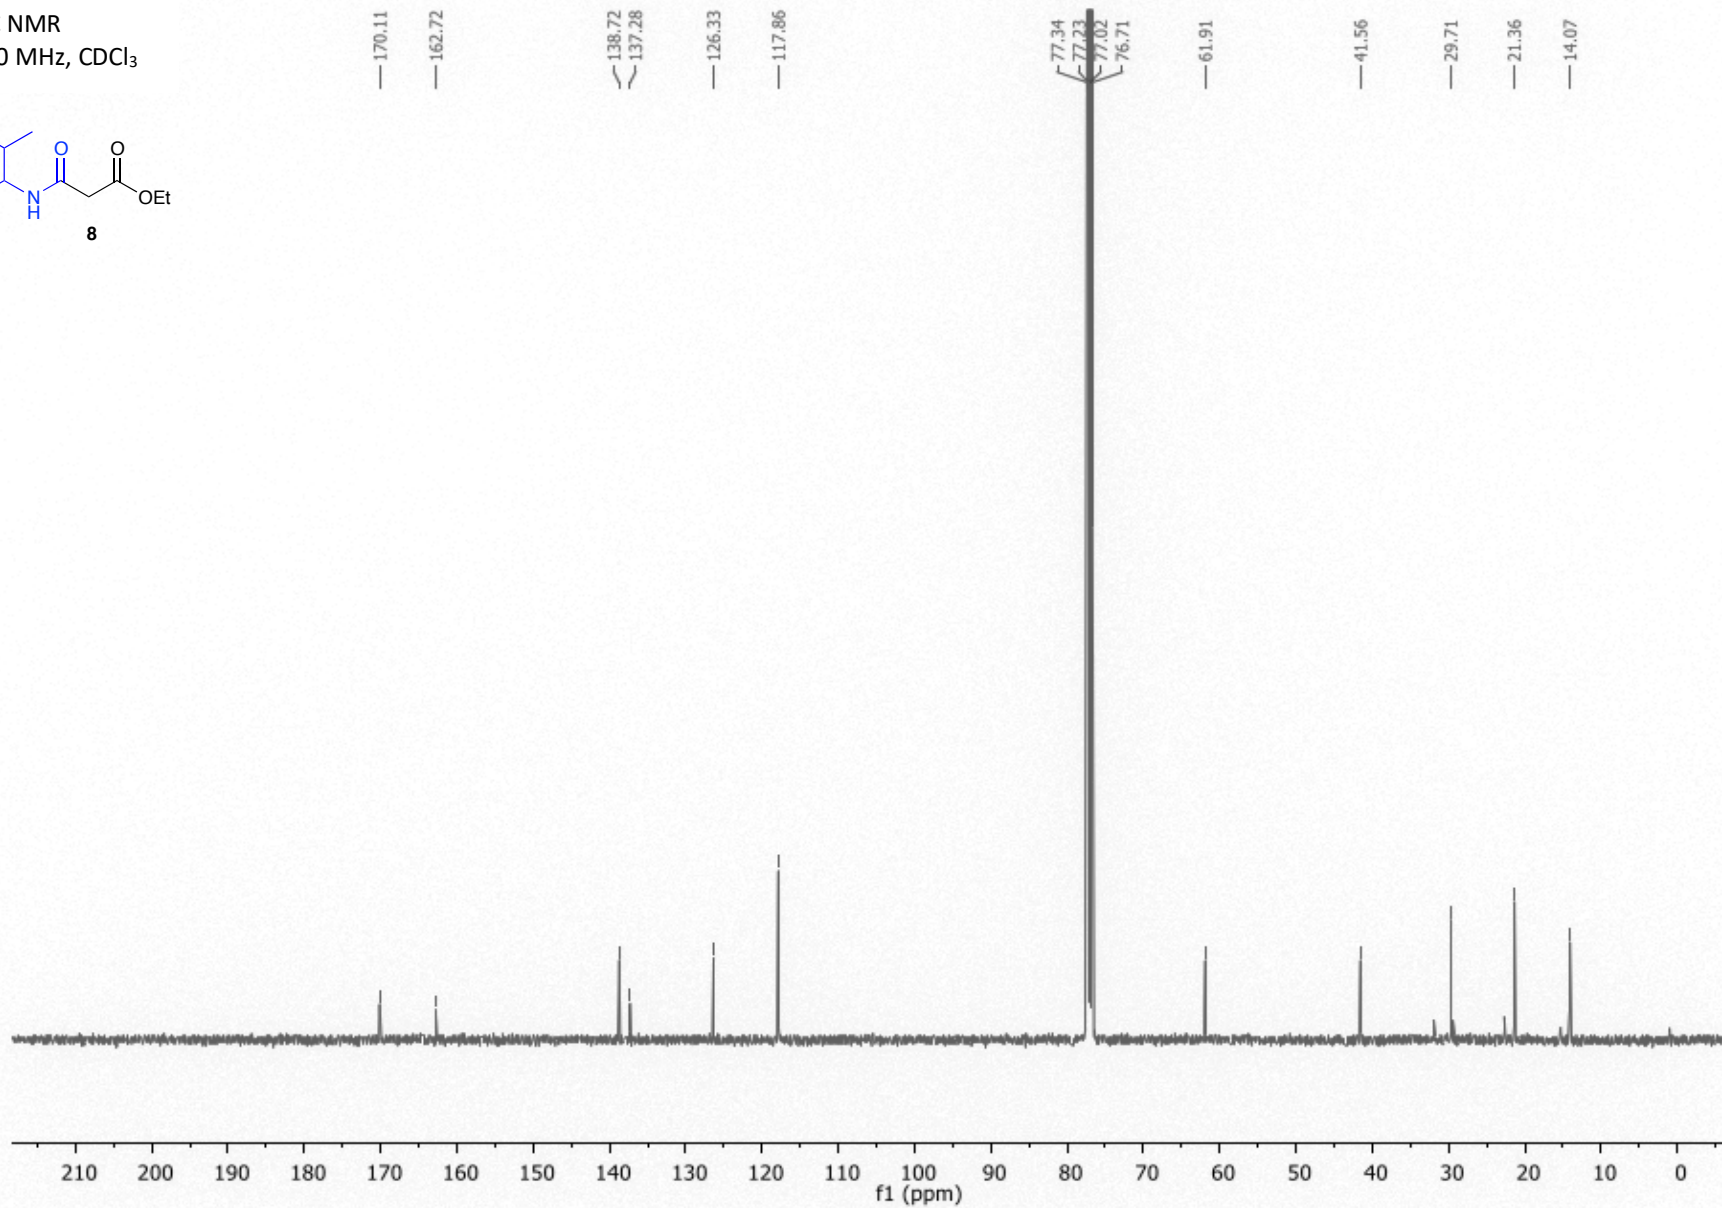



<sup>1</sup>H NMR  
400 MHz, CDCl<sub>3</sub>

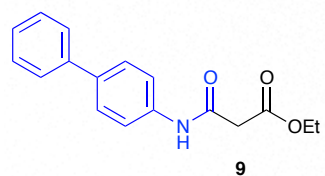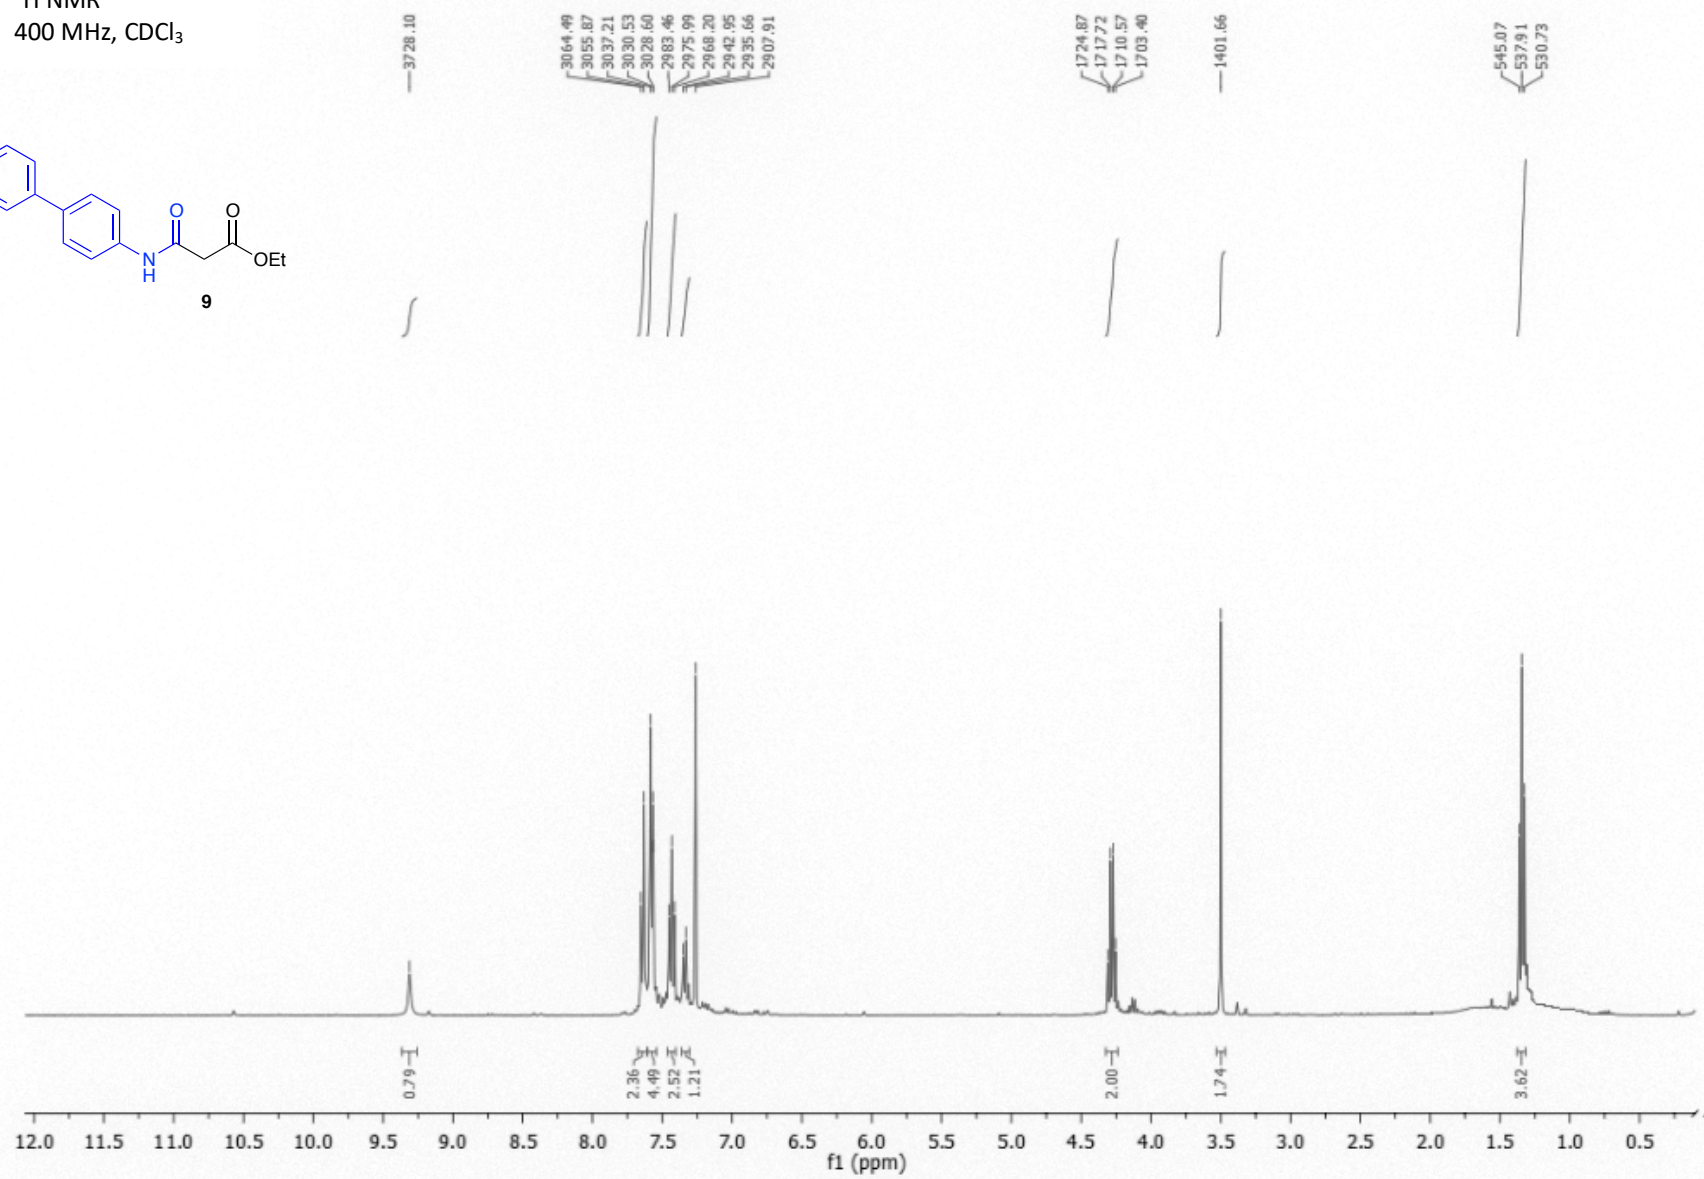

<sup>13</sup>C NMR  
100 MHz, CDCl<sub>3</sub>

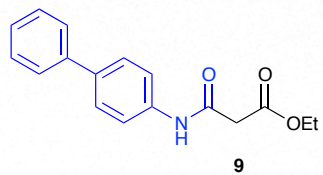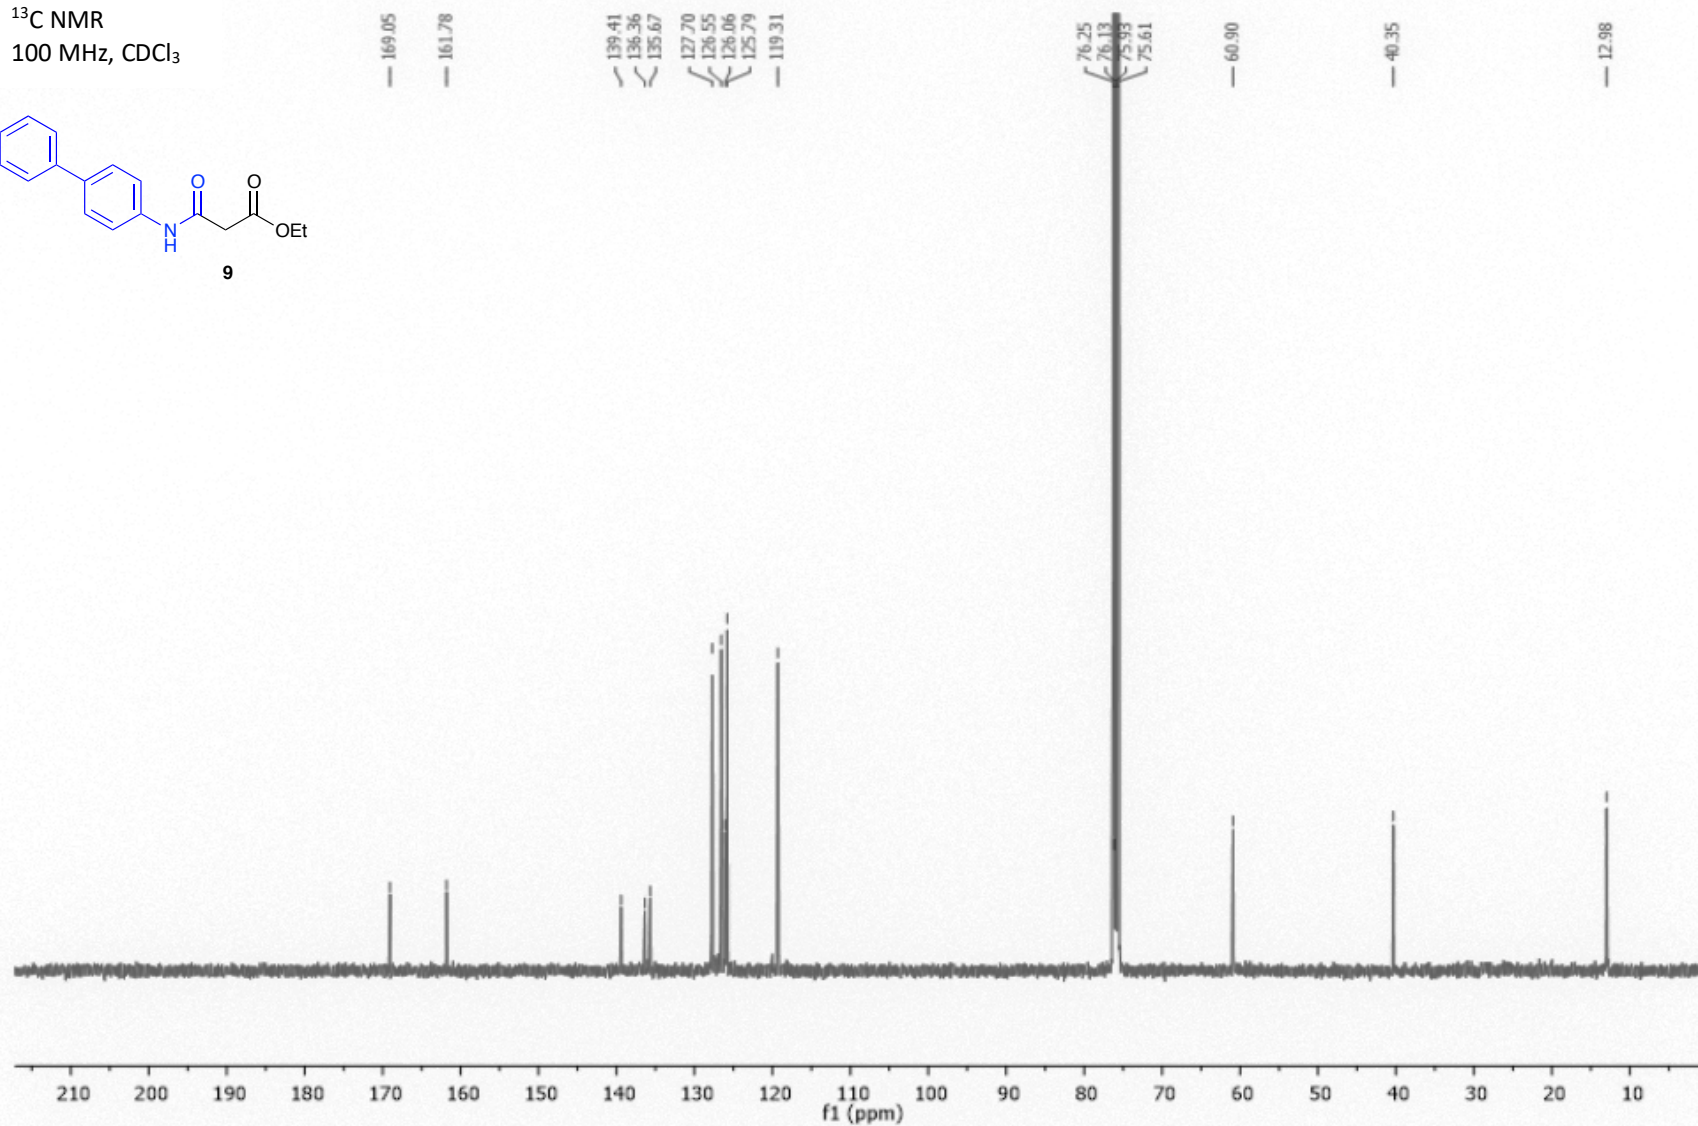



<sup>1</sup>H NMR  
400 MHz, CDCl<sub>3</sub>

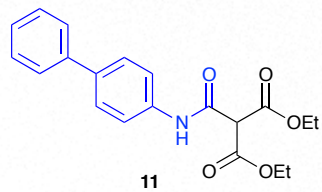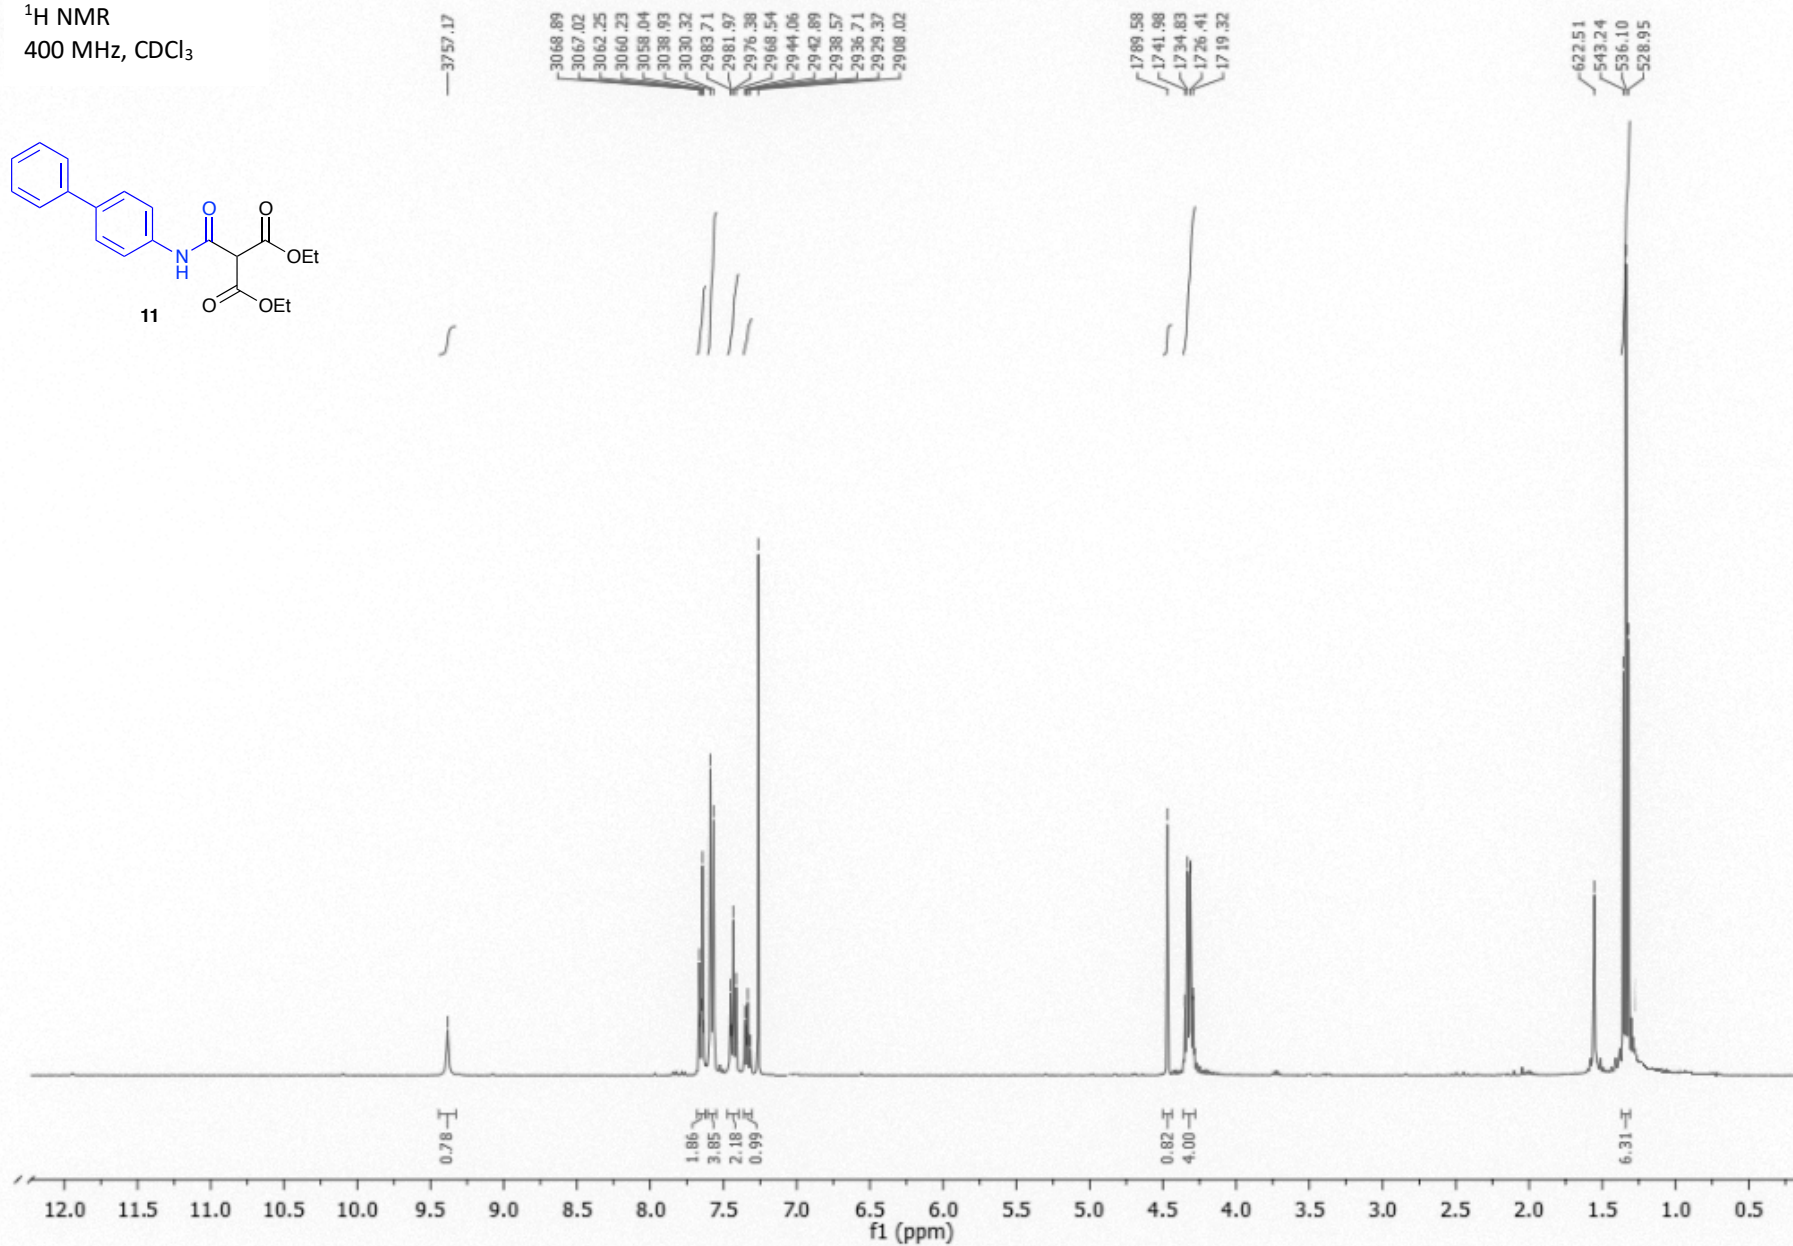

<sup>13</sup>C NMR  
100 MHz, CDCl<sub>3</sub>

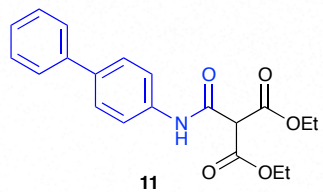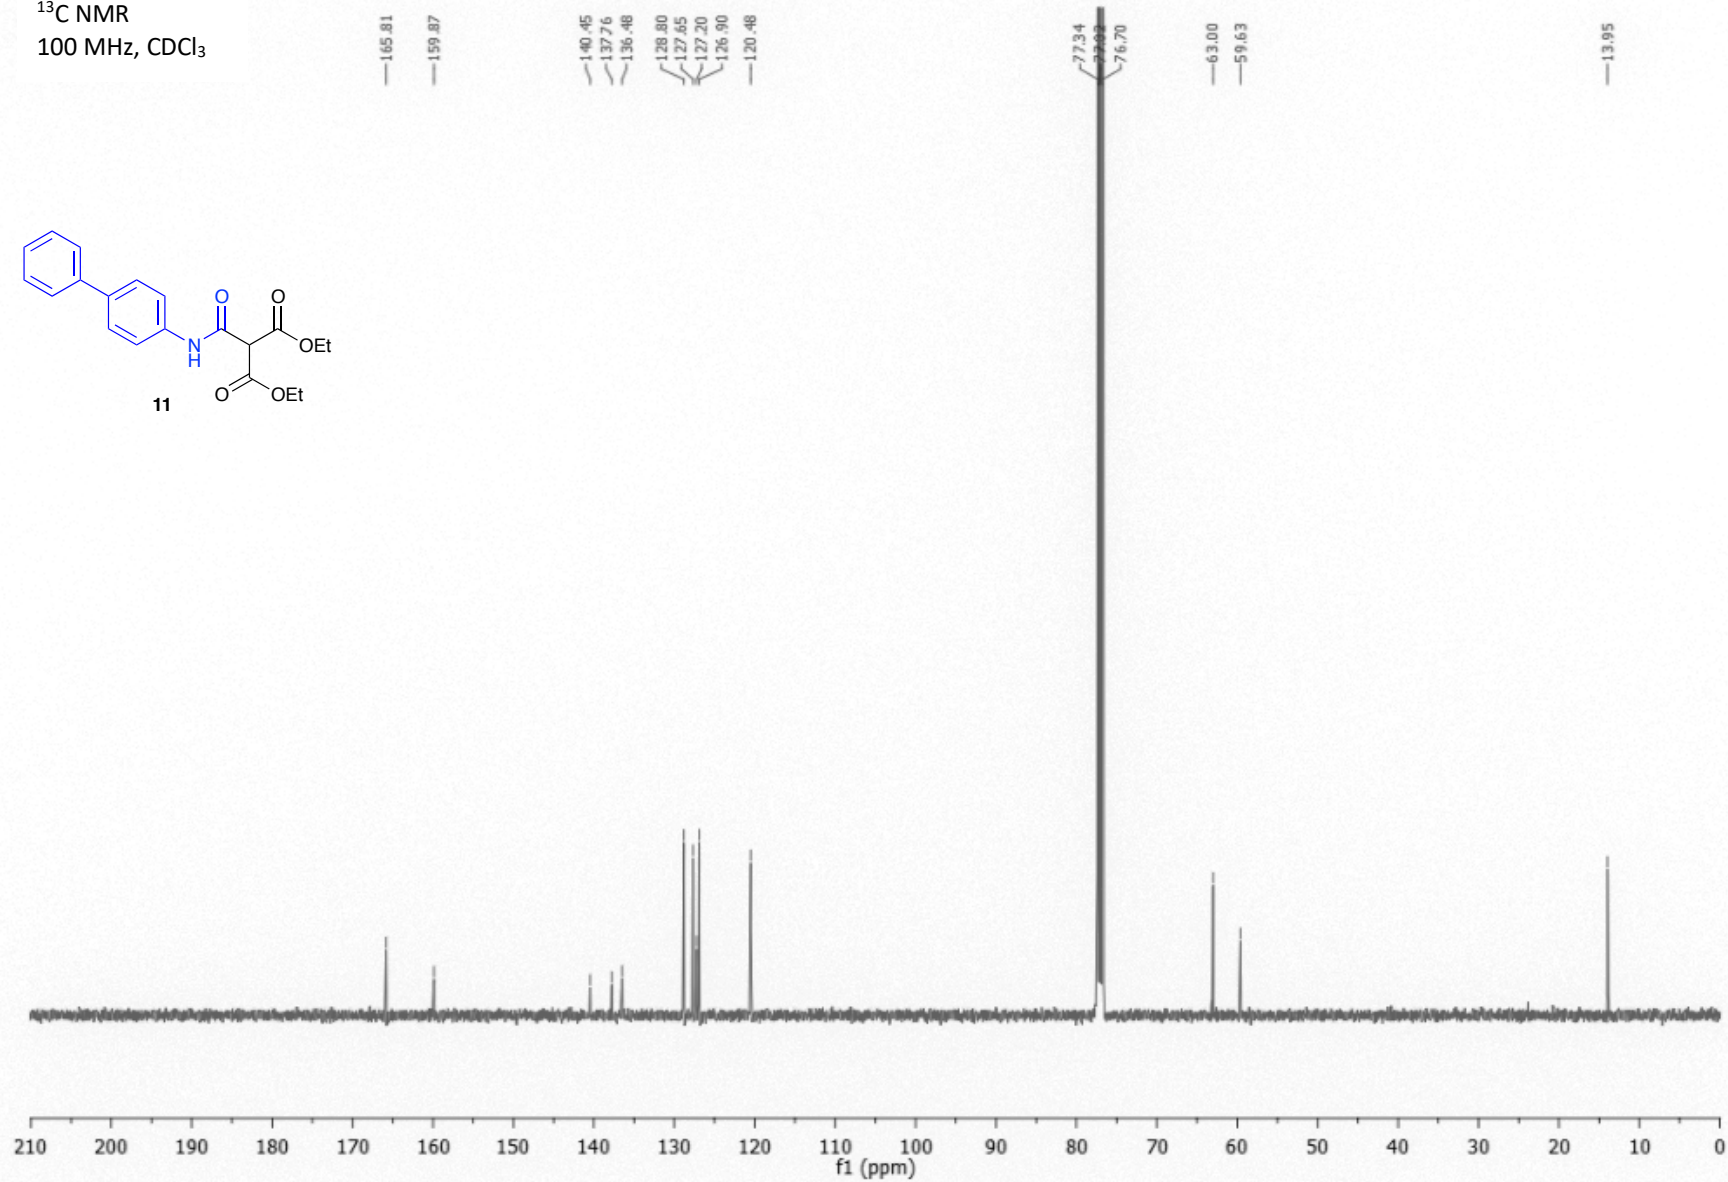

<sup>1</sup>H NMR  
400 MHz, CDCl<sub>3</sub>

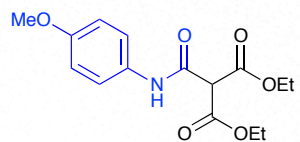

12

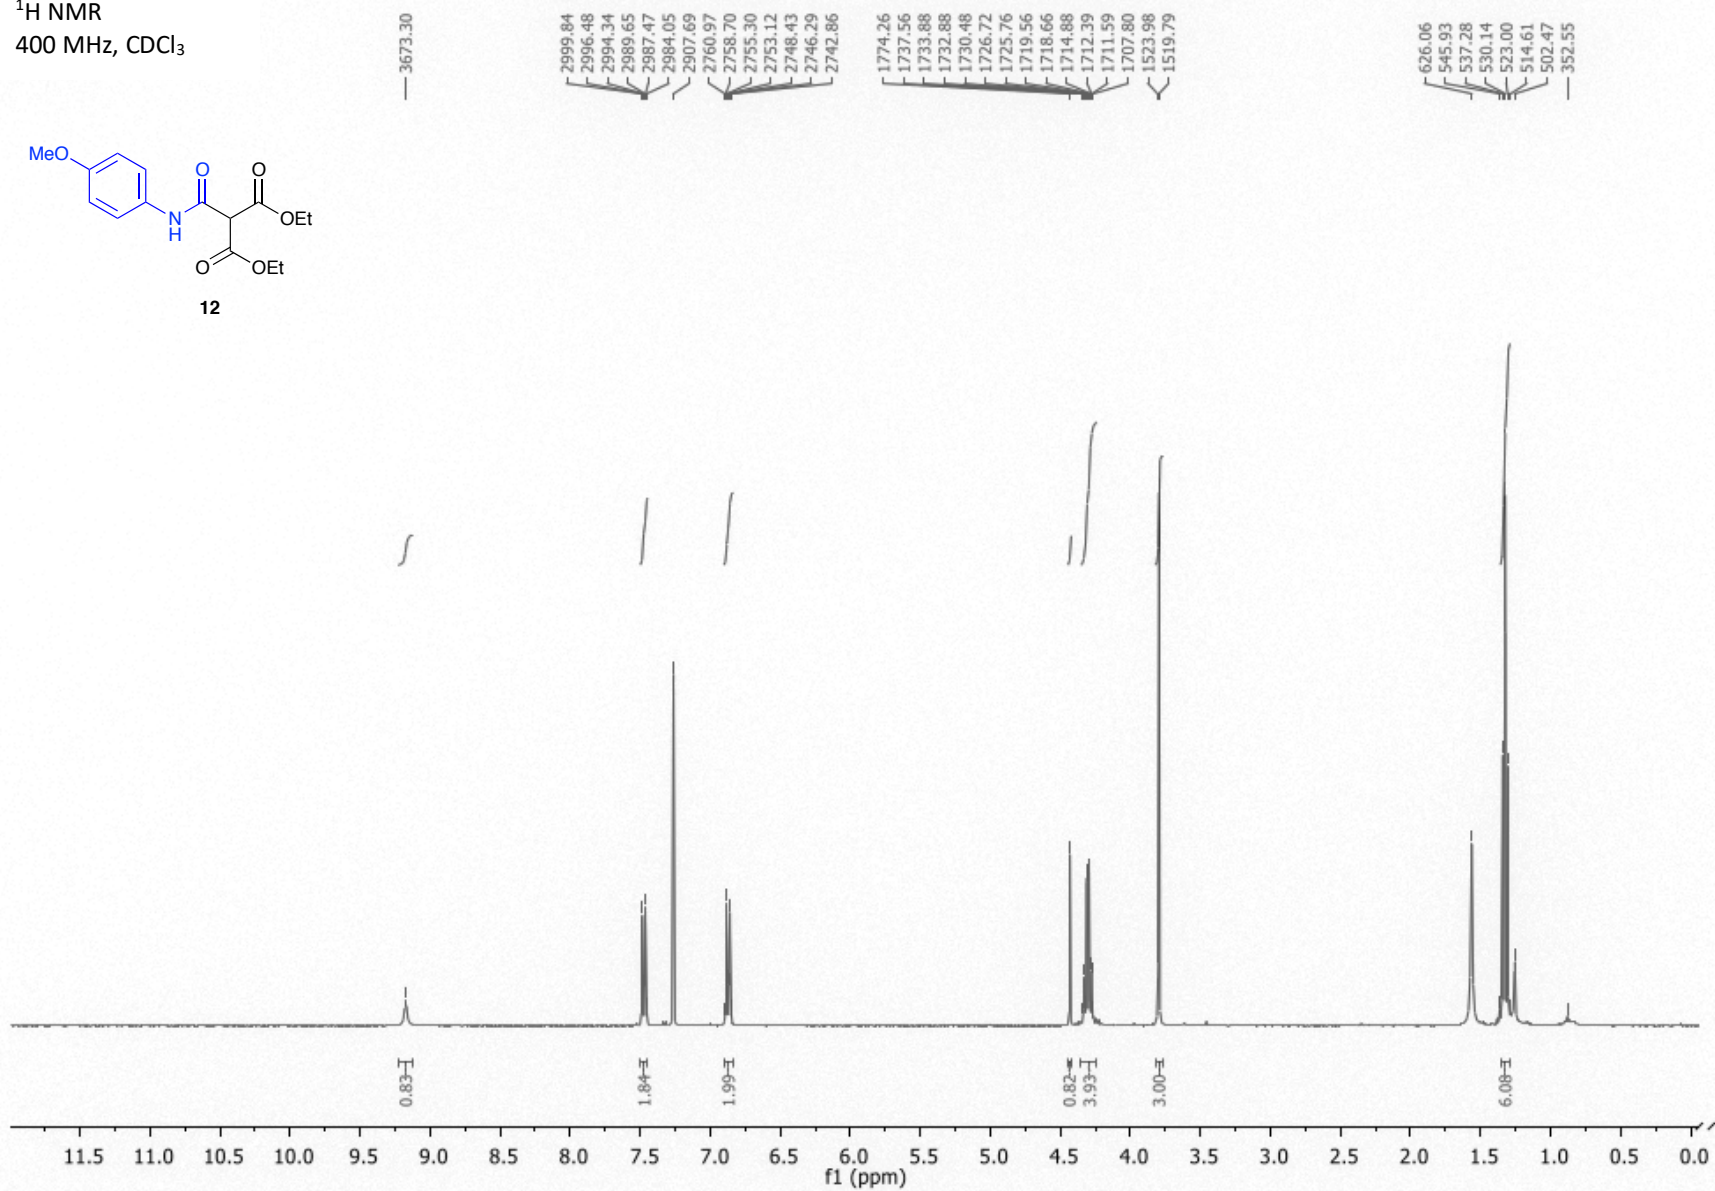



<sup>13</sup>C NMR  
100 MHz, CDCl<sub>3</sub>

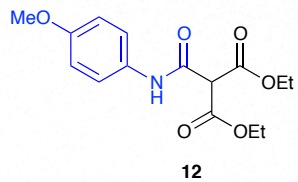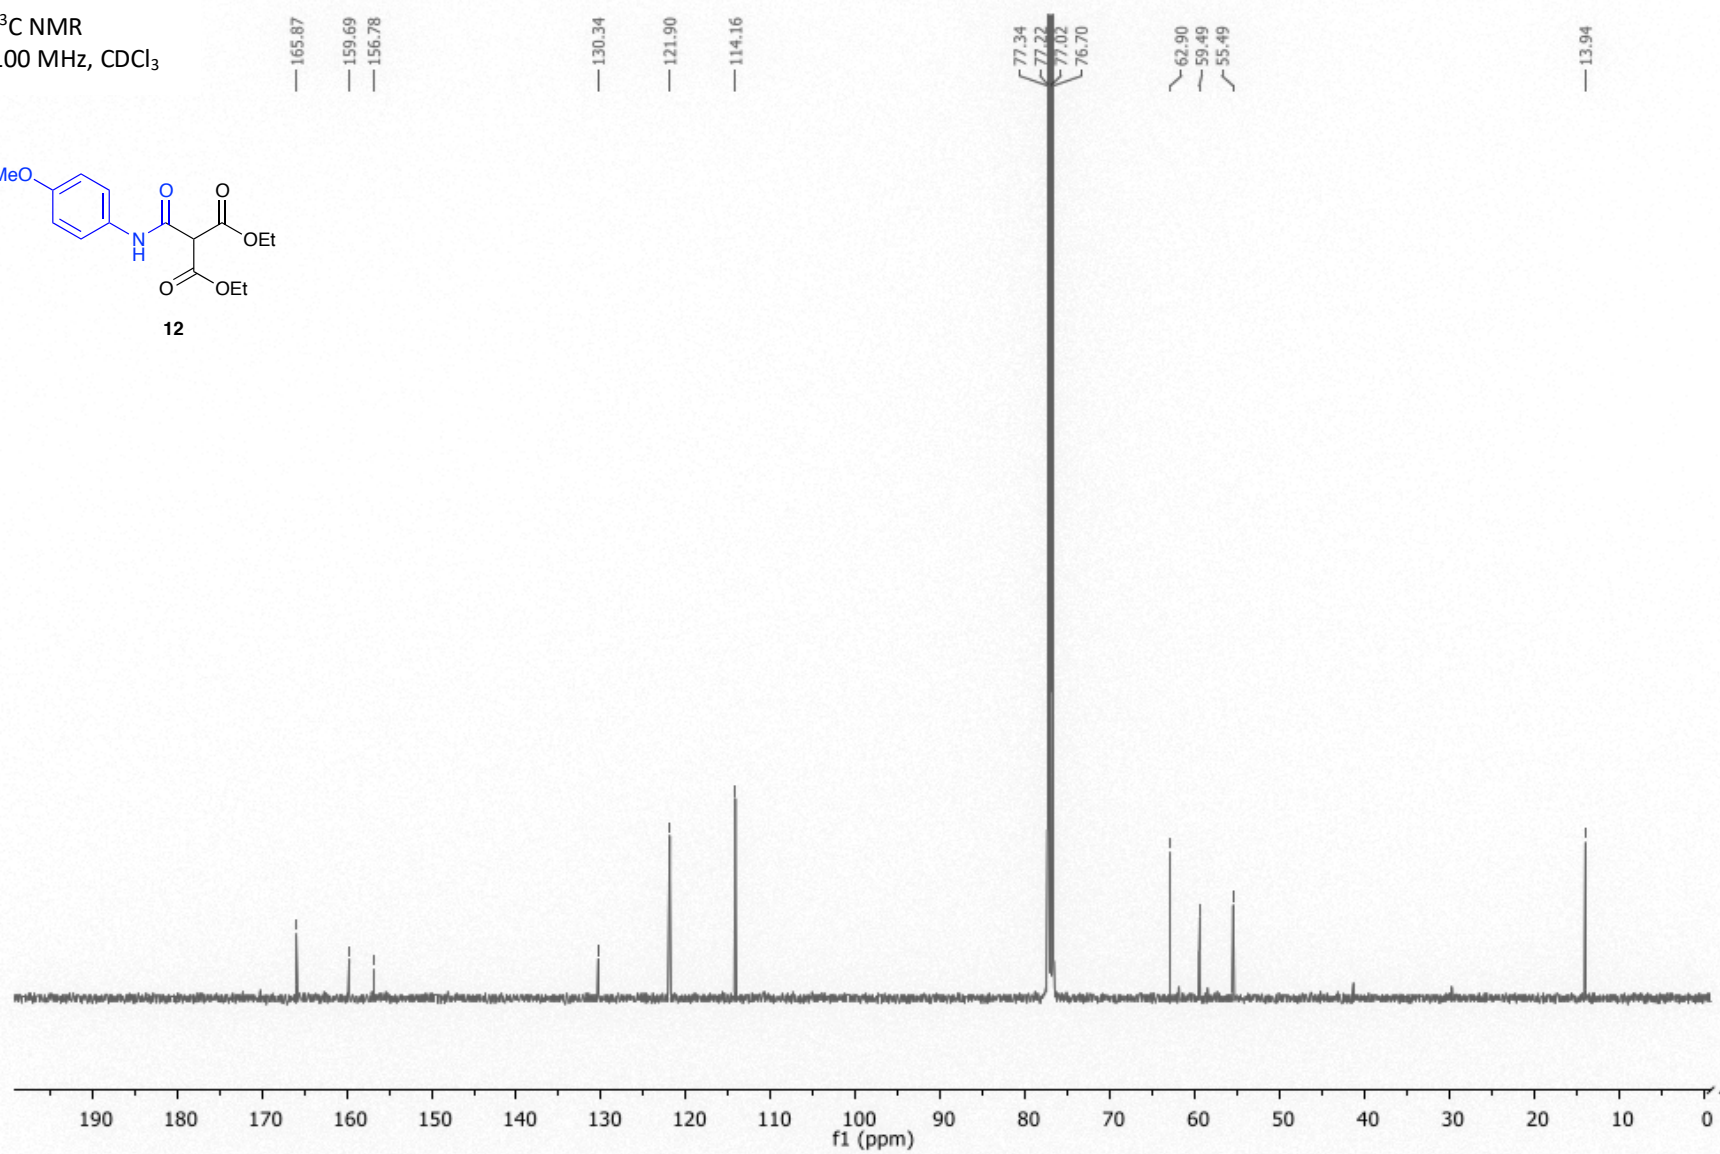

<sup>1</sup>H NMR  
400 MHz, CDCl<sub>3</sub>

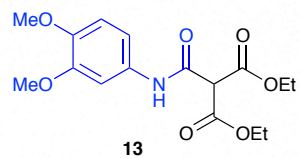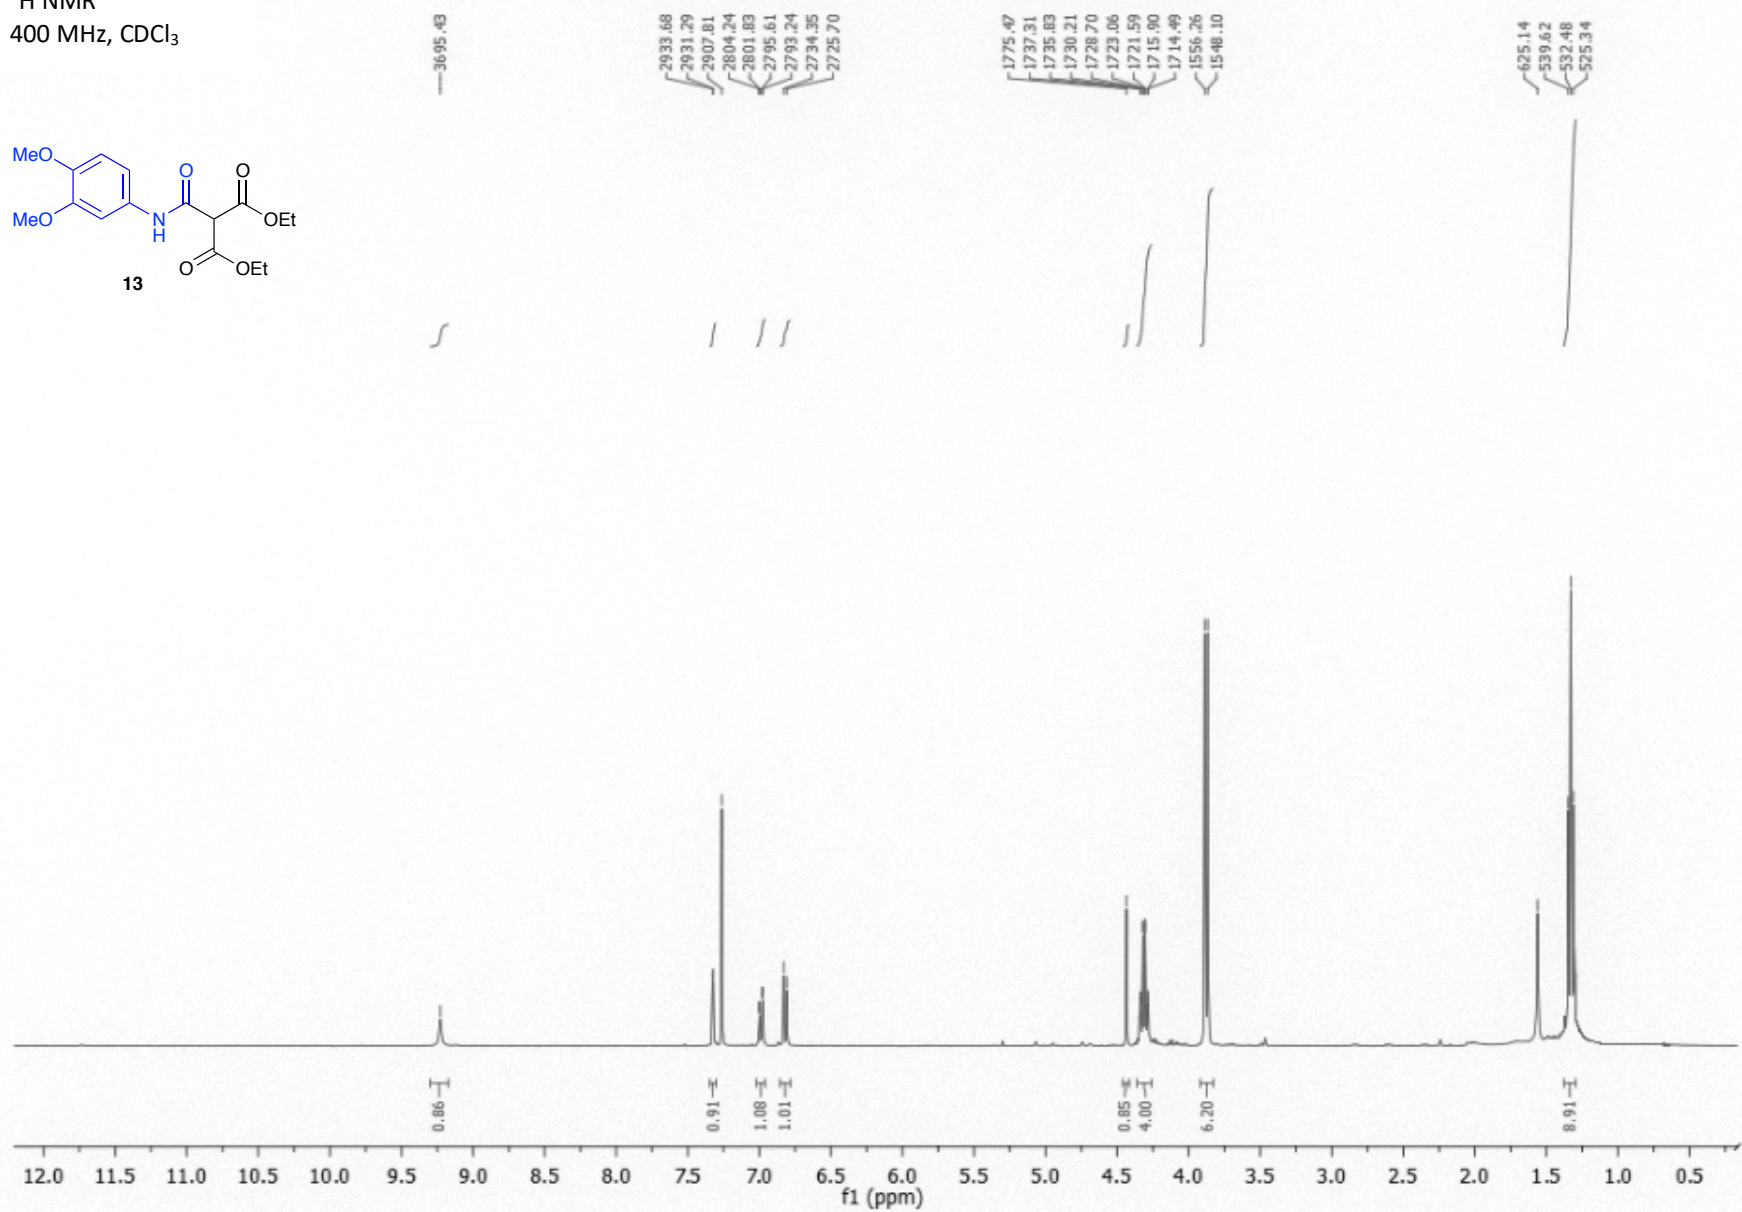

<sup>13</sup>C NMR  
100 MHz, CDCl<sub>3</sub>

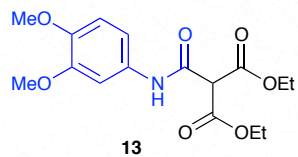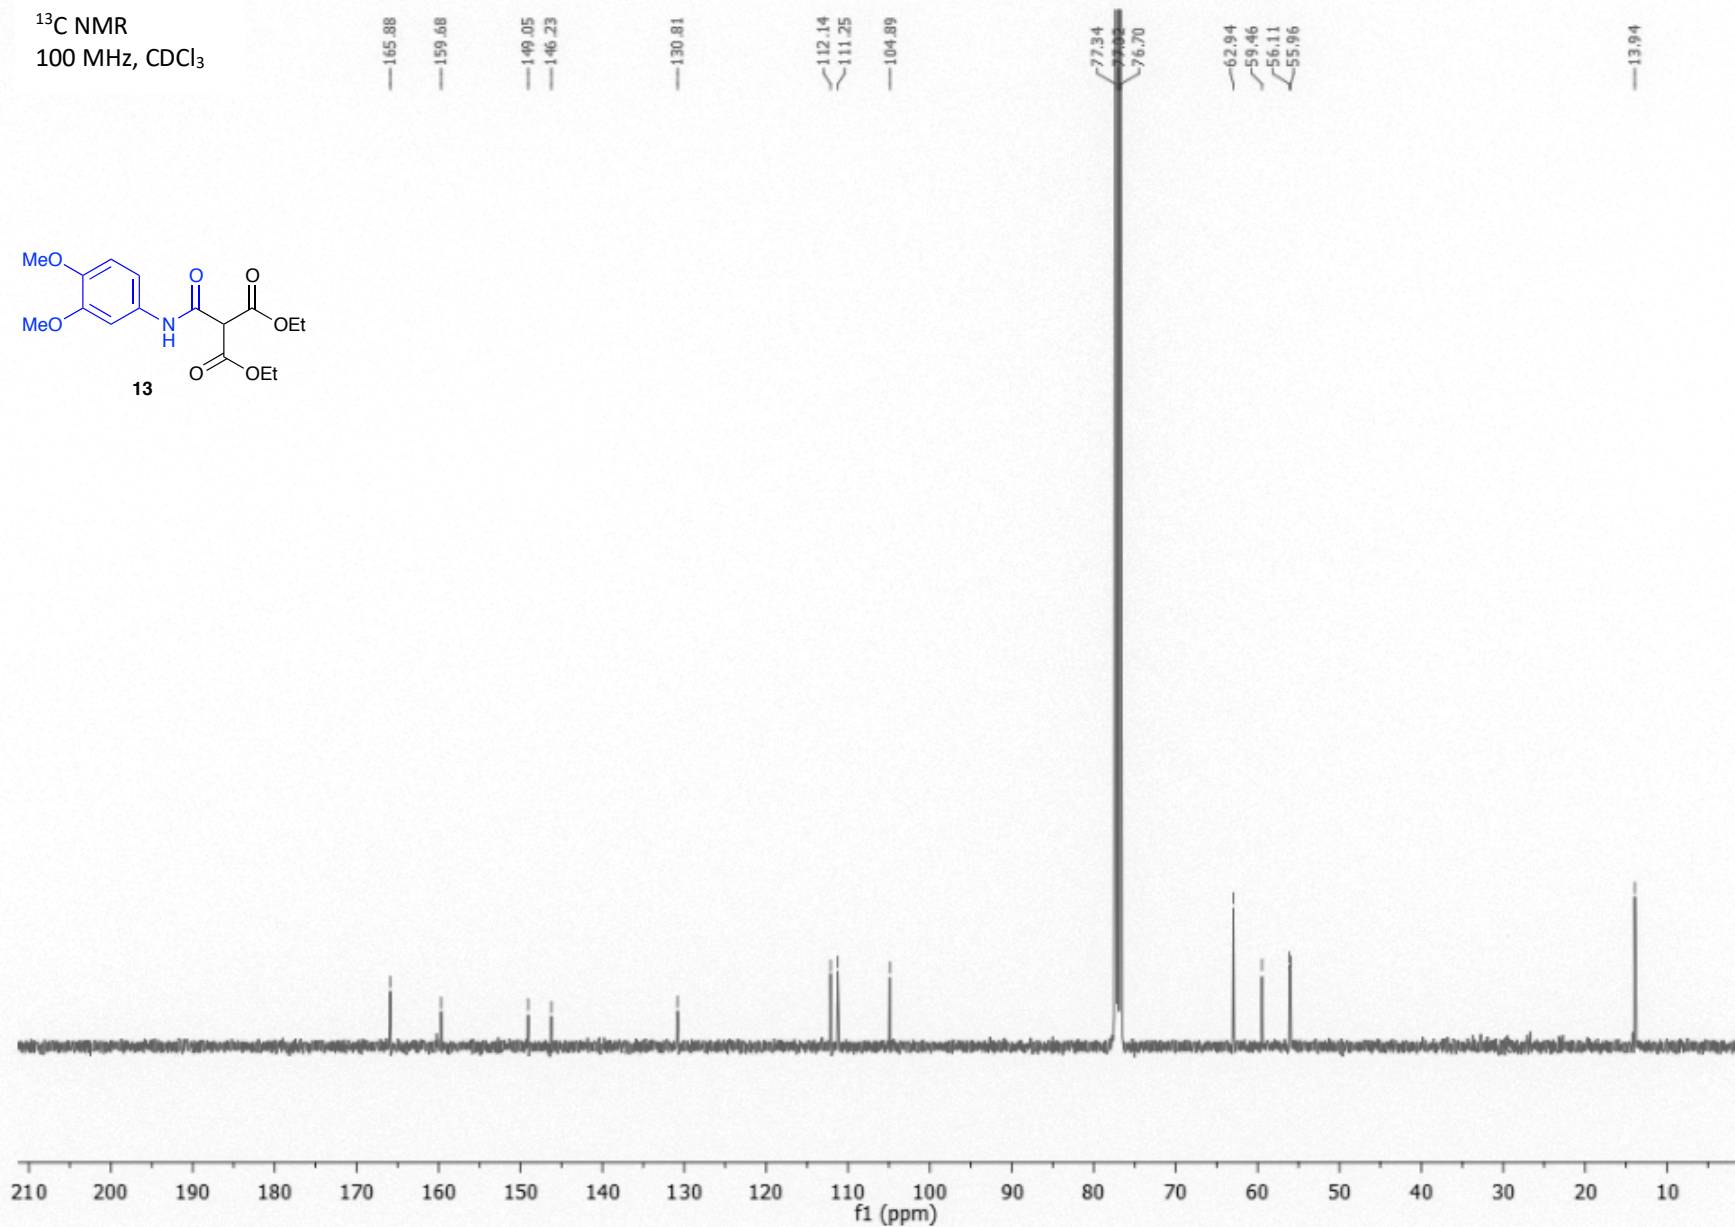



<sup>1</sup>H NMR  
400 MHz, CDCl<sub>3</sub>

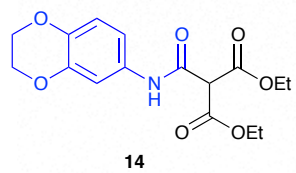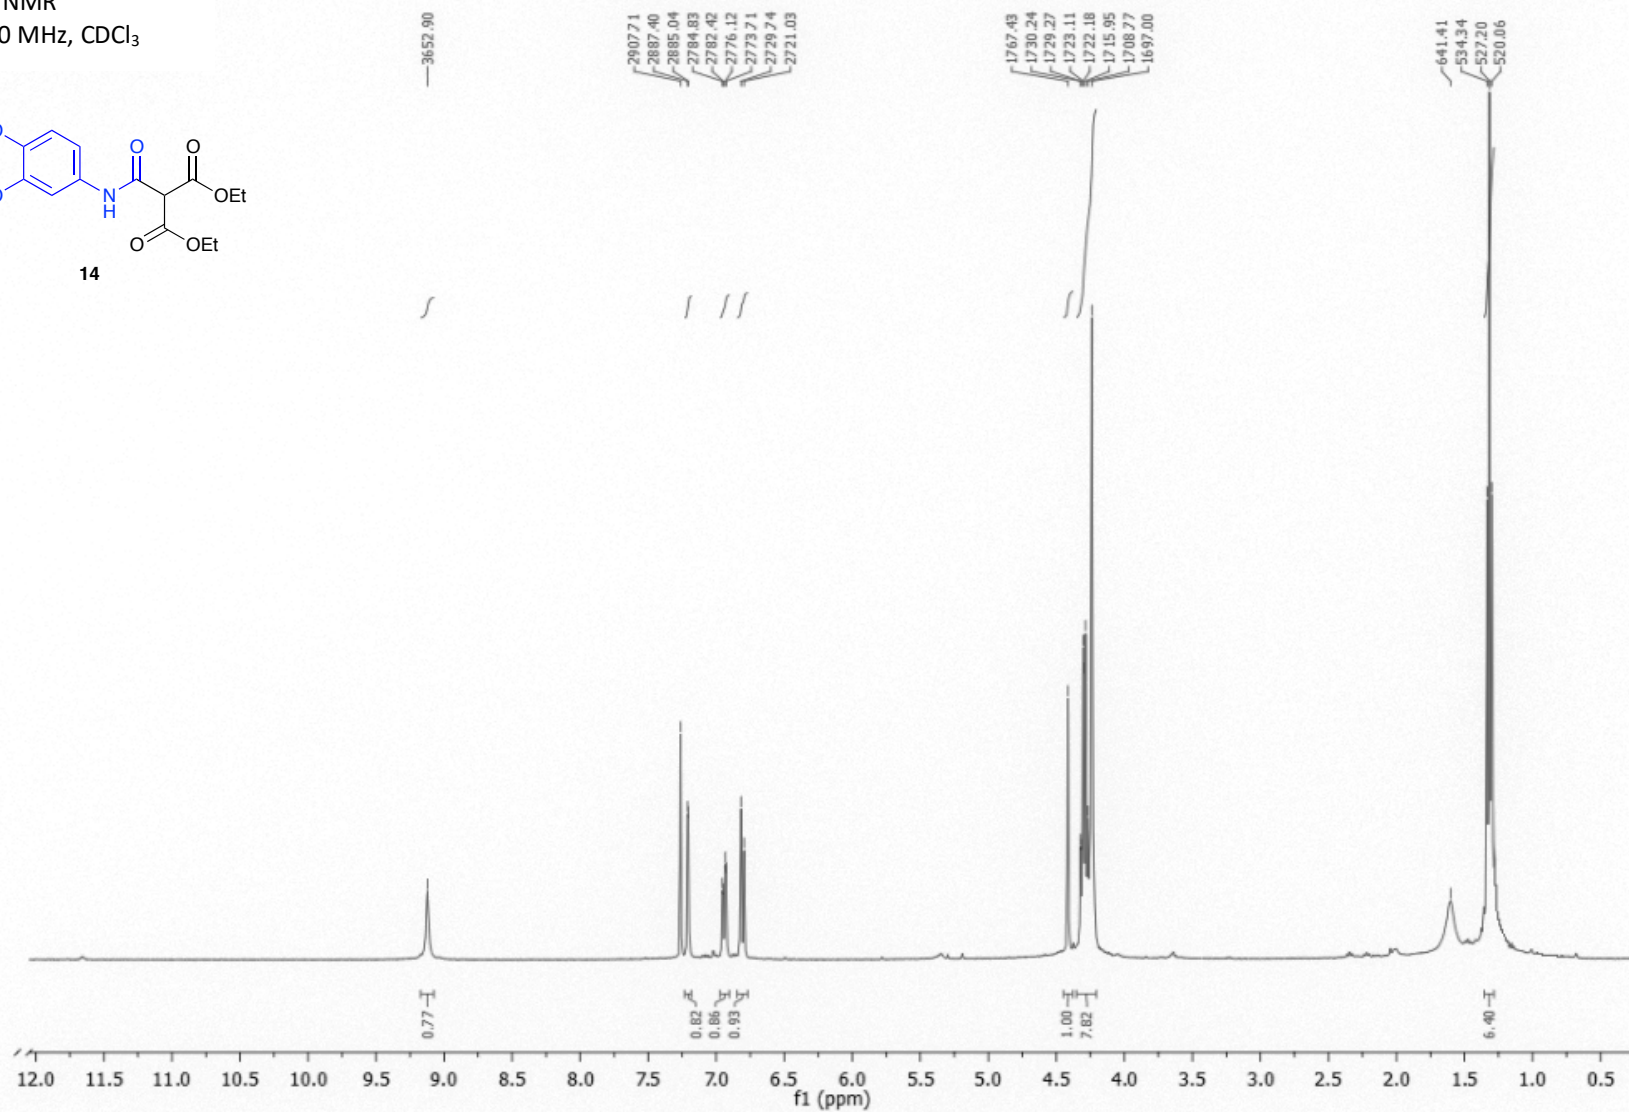

<sup>13</sup>C NMR  
100 MHz, CDCl<sub>3</sub>

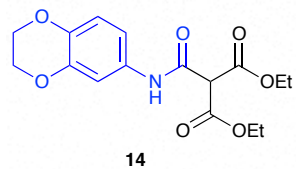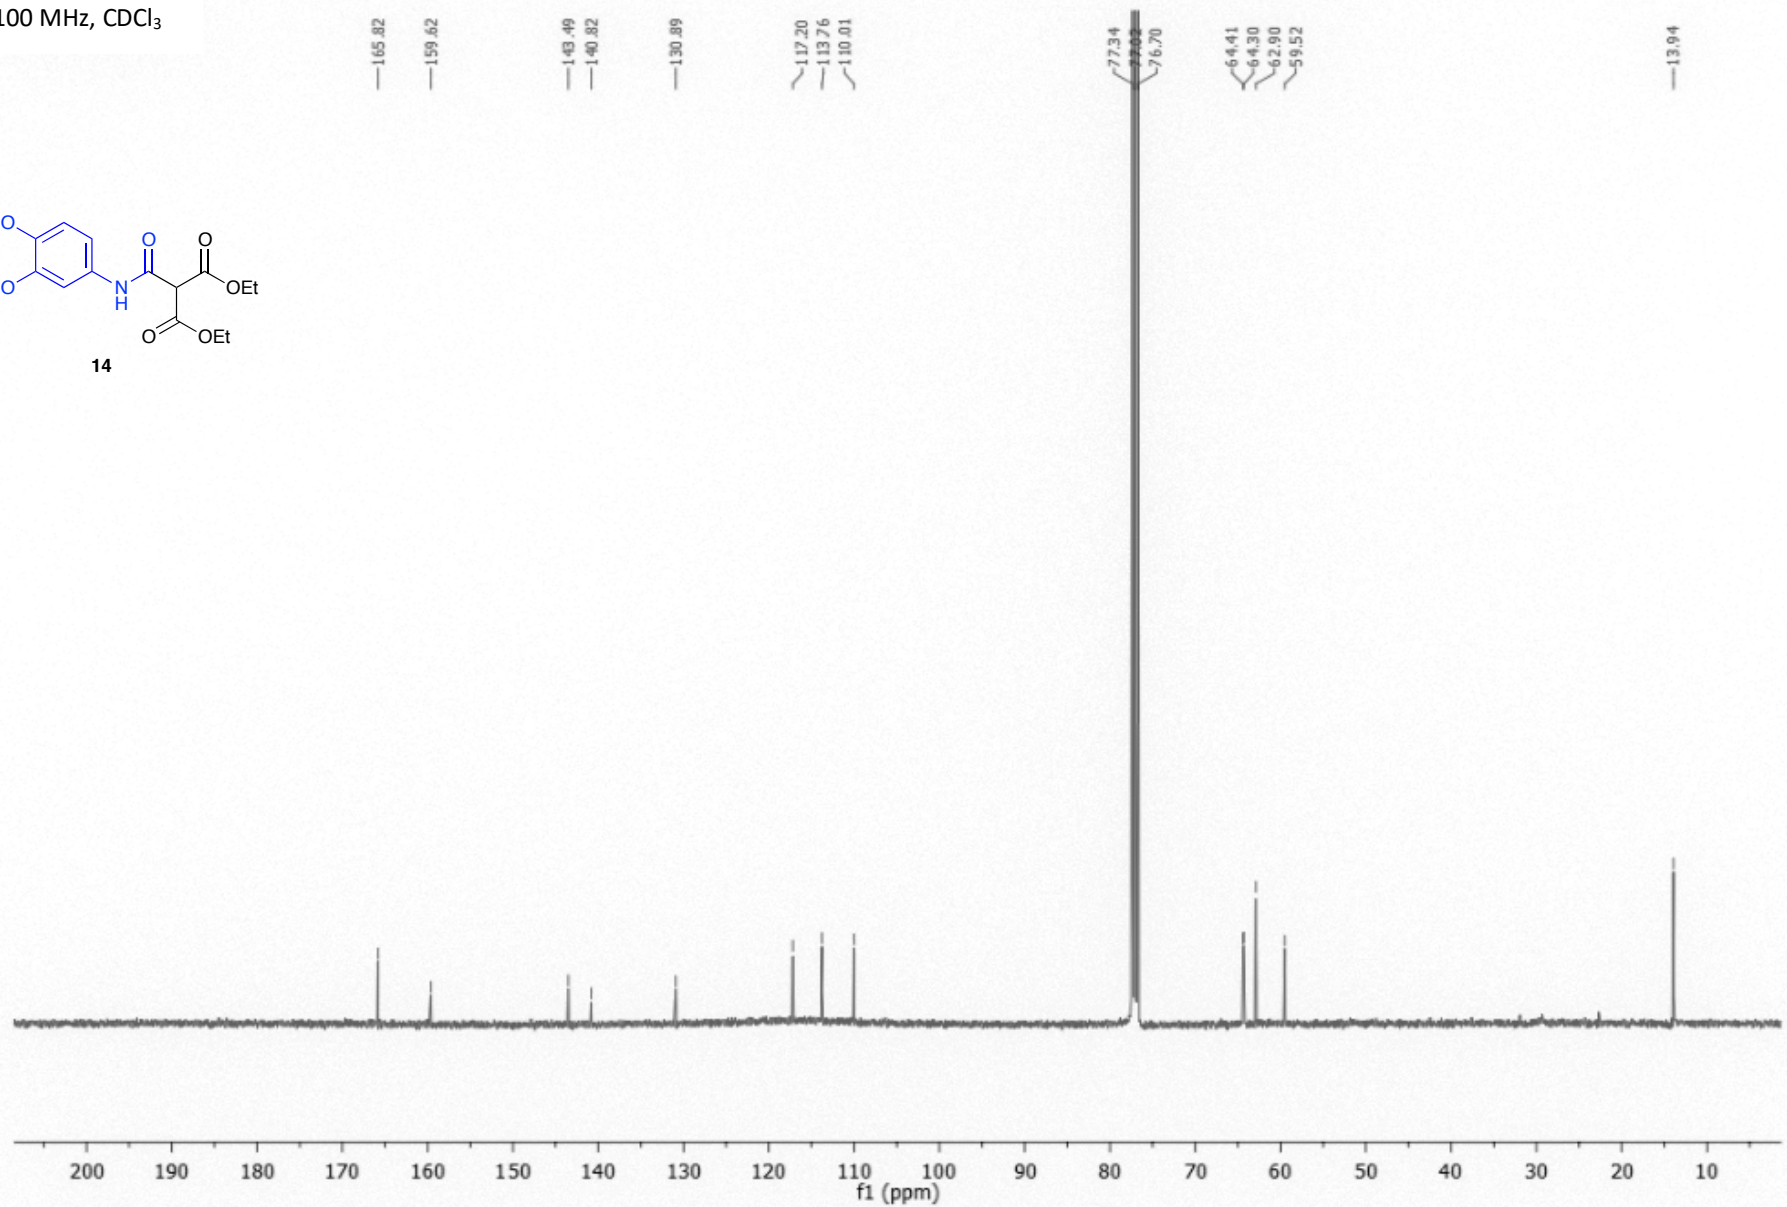



<sup>1</sup>H NMR  
400 MHz, CDCl<sub>3</sub>

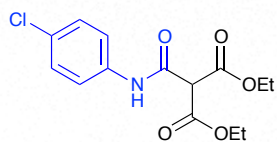

15

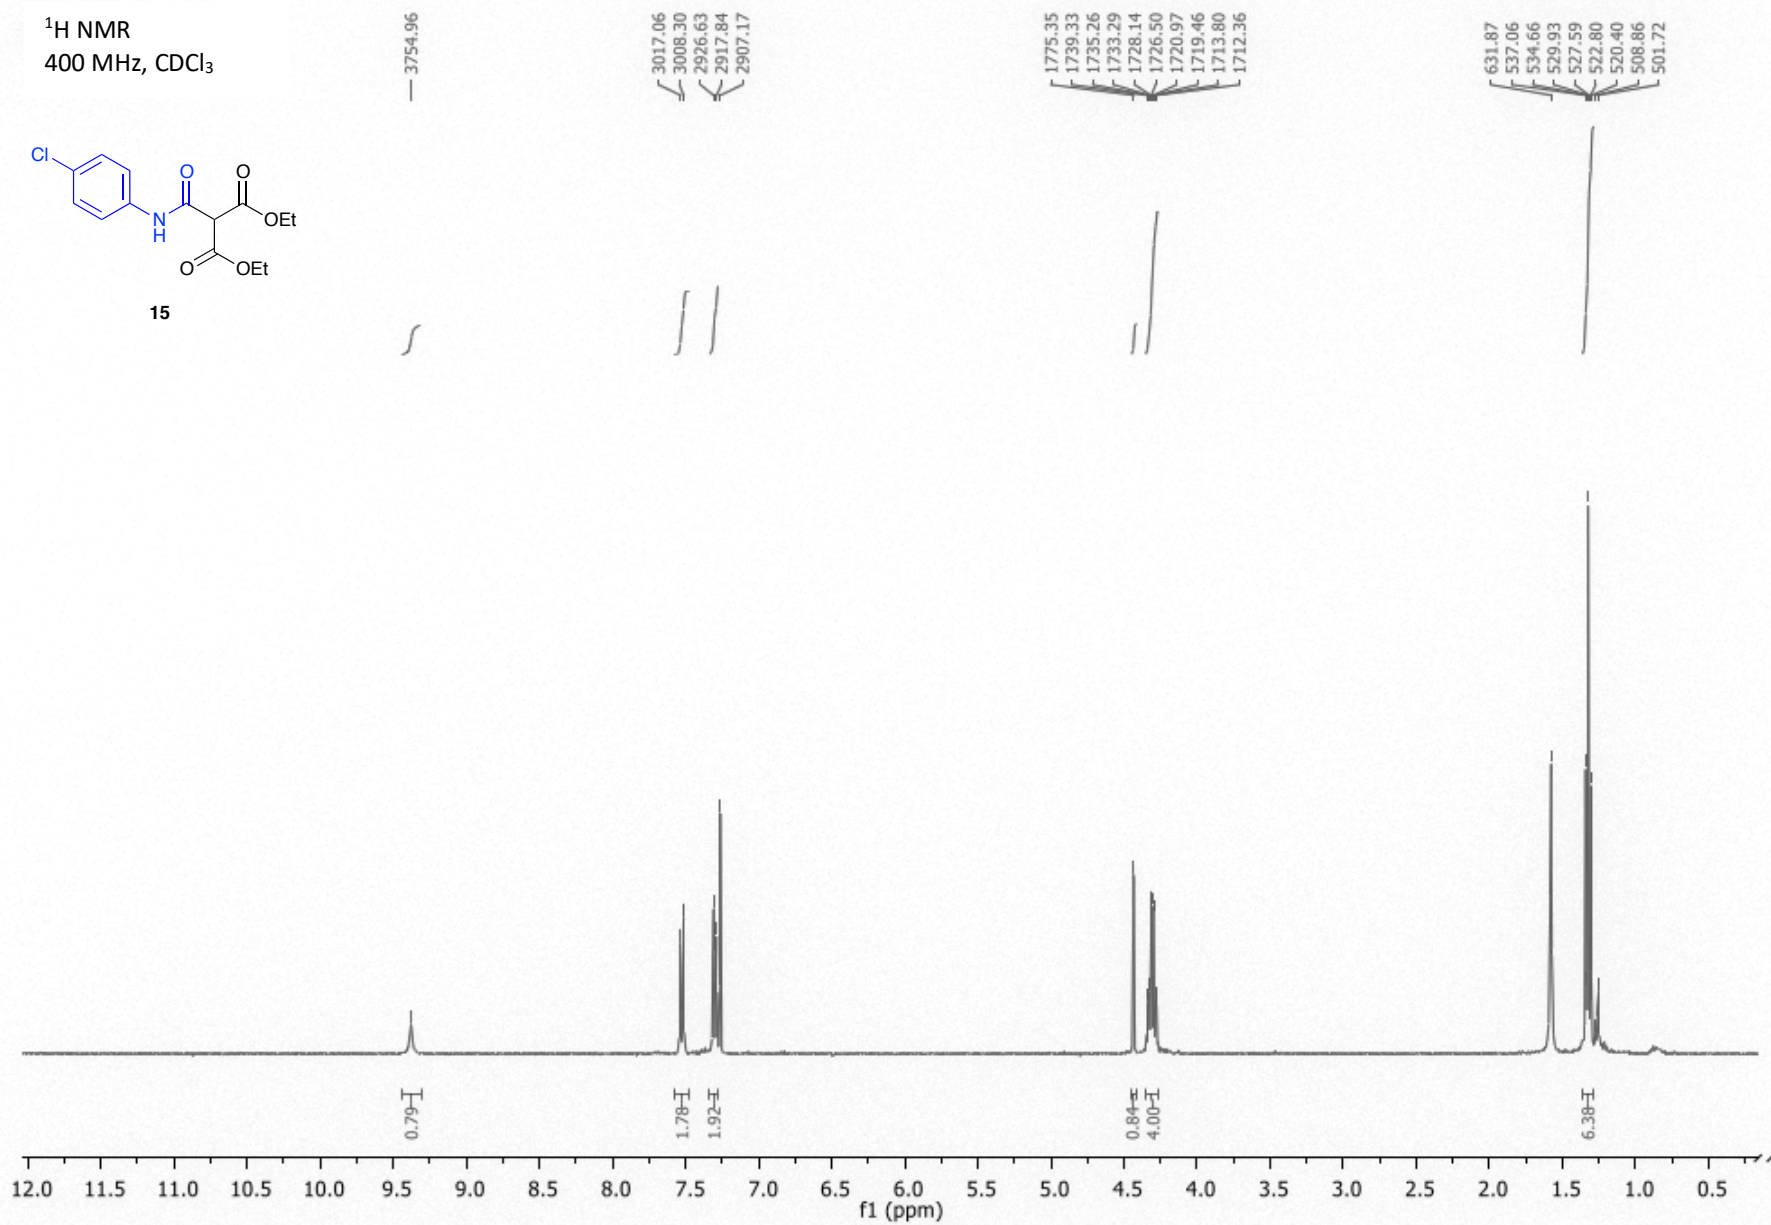

<sup>13</sup>C NMR  
100 MHz, CDCl<sub>3</sub>

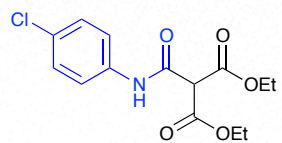

15

— 165.73

— 159.94

— 135.77

— 129.88

— 129.06

— 121.40

— 63.06

— 59.45

— 13.93

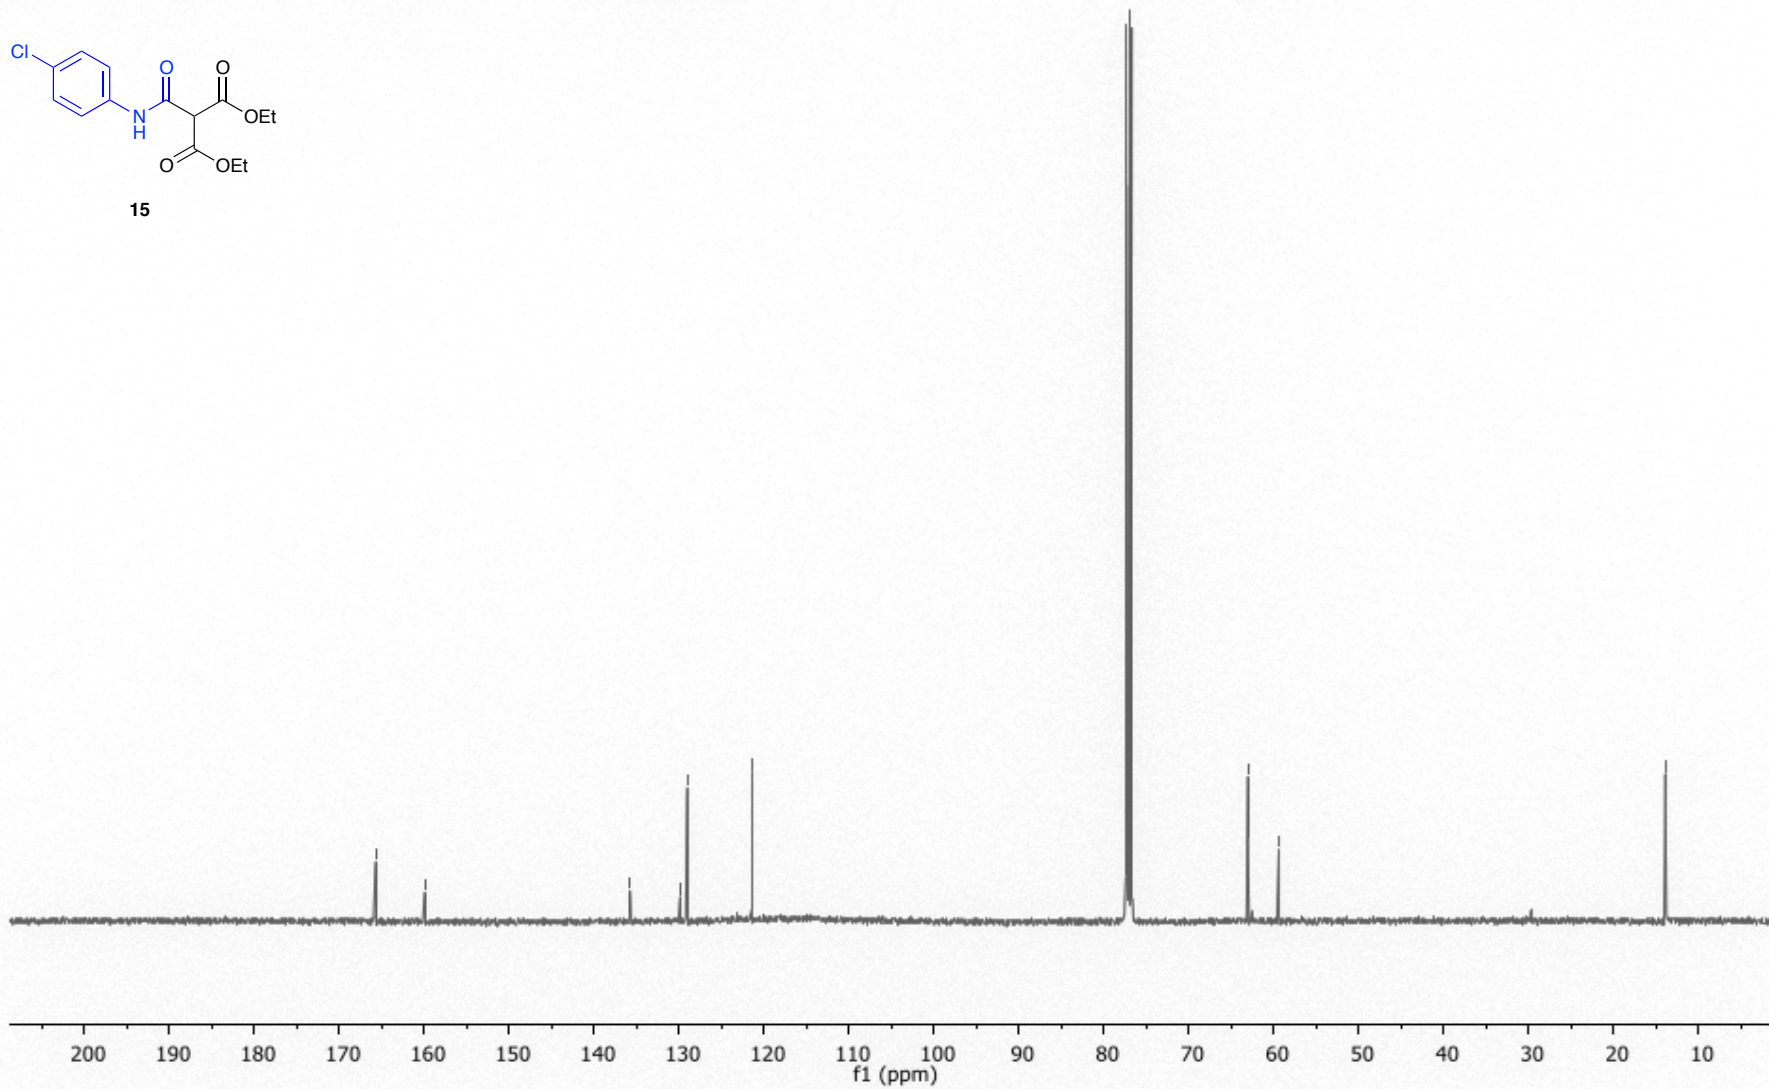

<sup>1</sup>H NMR  
400 MHz, CDCl<sub>3</sub>

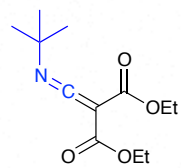

16

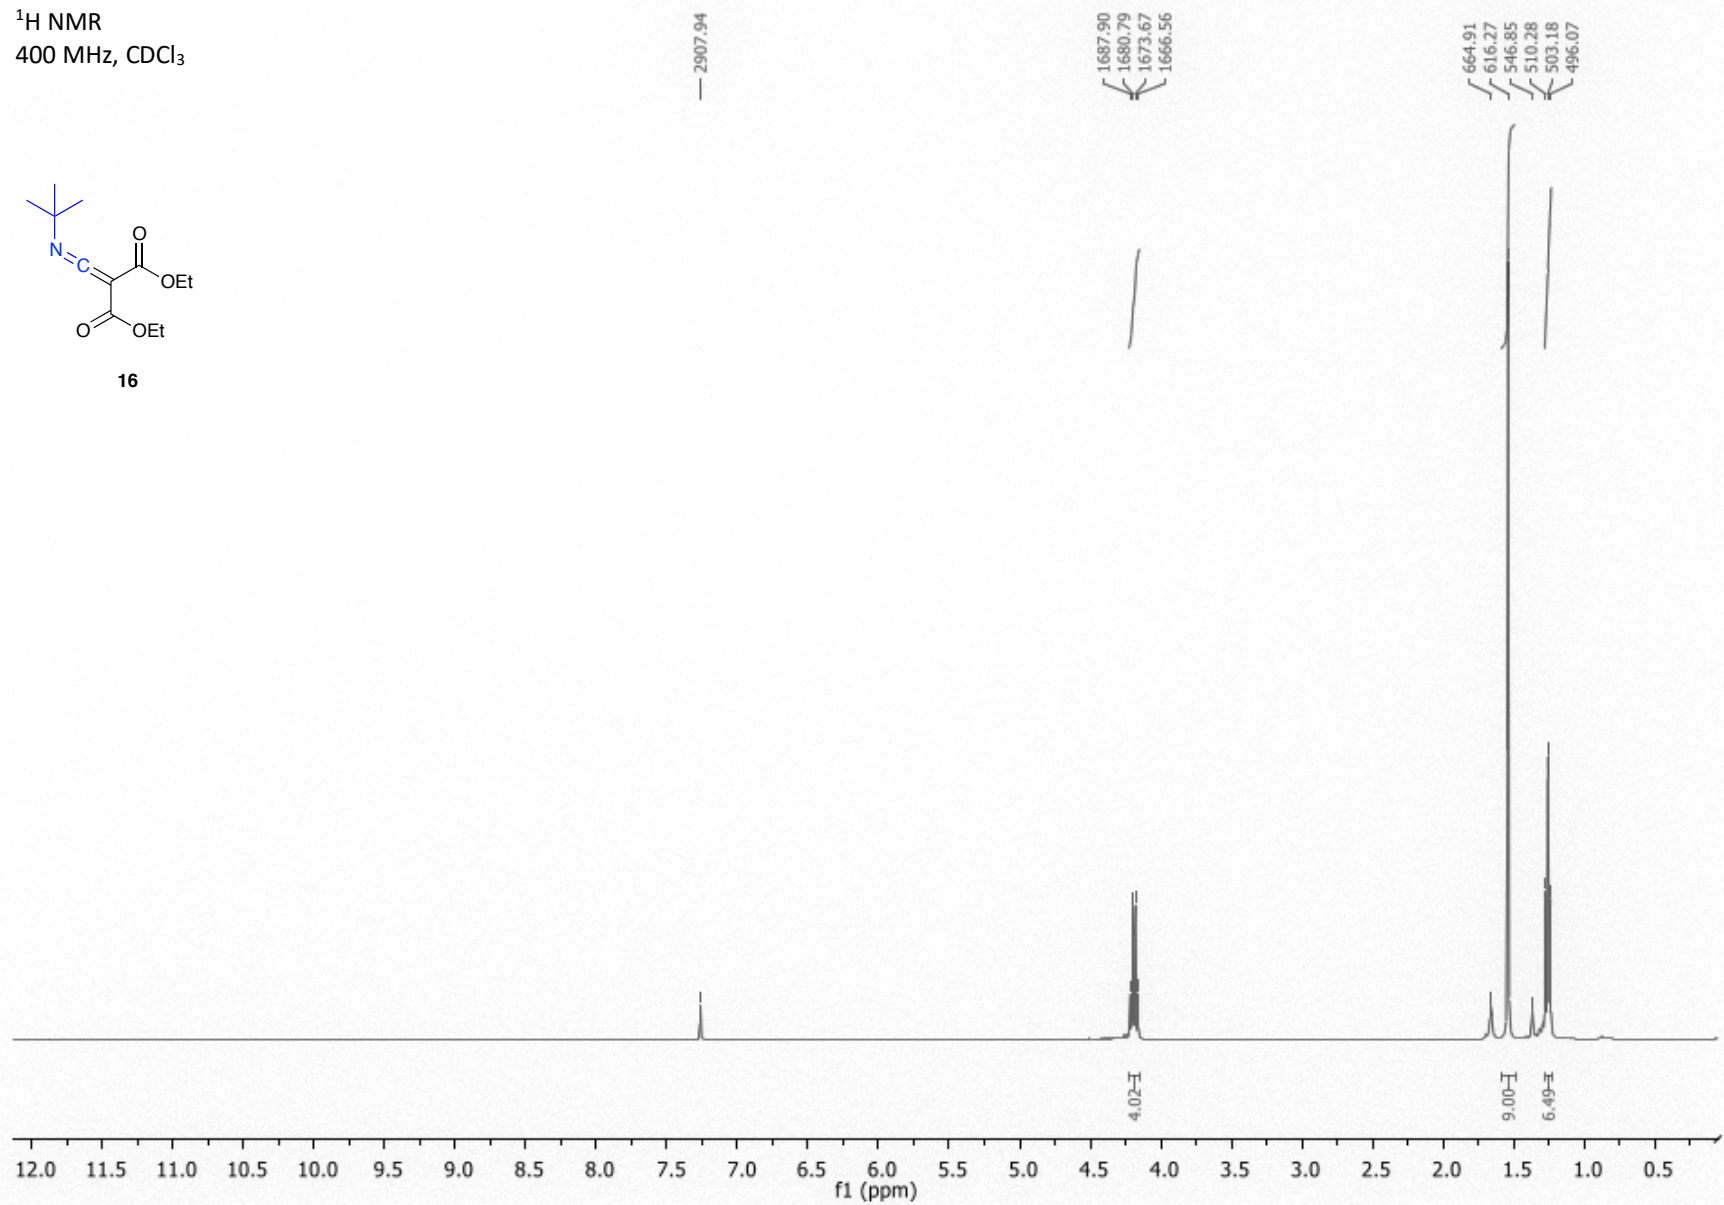



<sup>13</sup>C NMR  
100 MHz, CDCl<sub>3</sub>

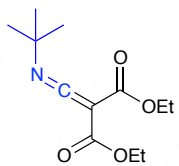

16

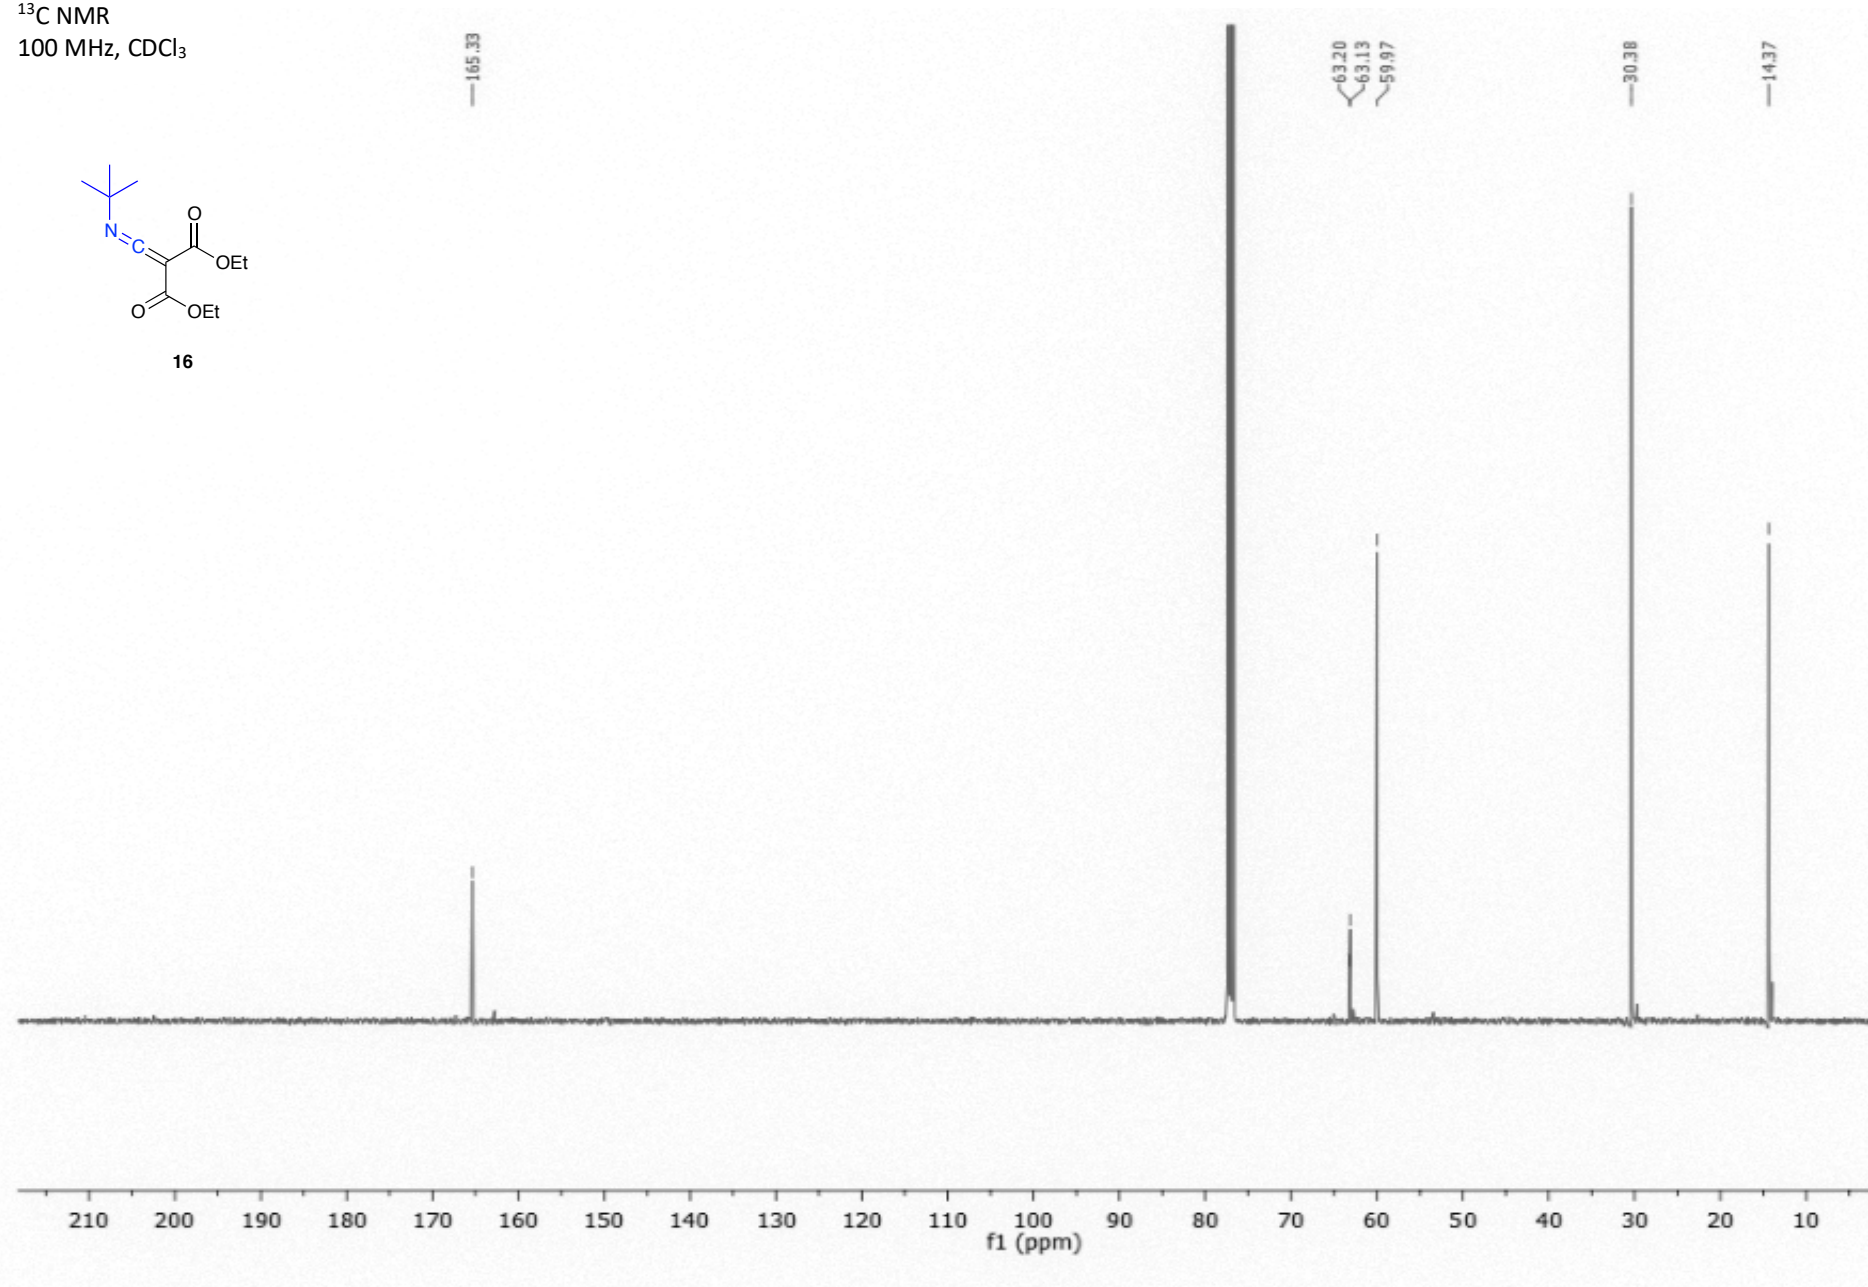

<sup>1</sup>H NMR  
400 MHz, CDCl<sub>3</sub>

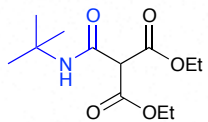

17

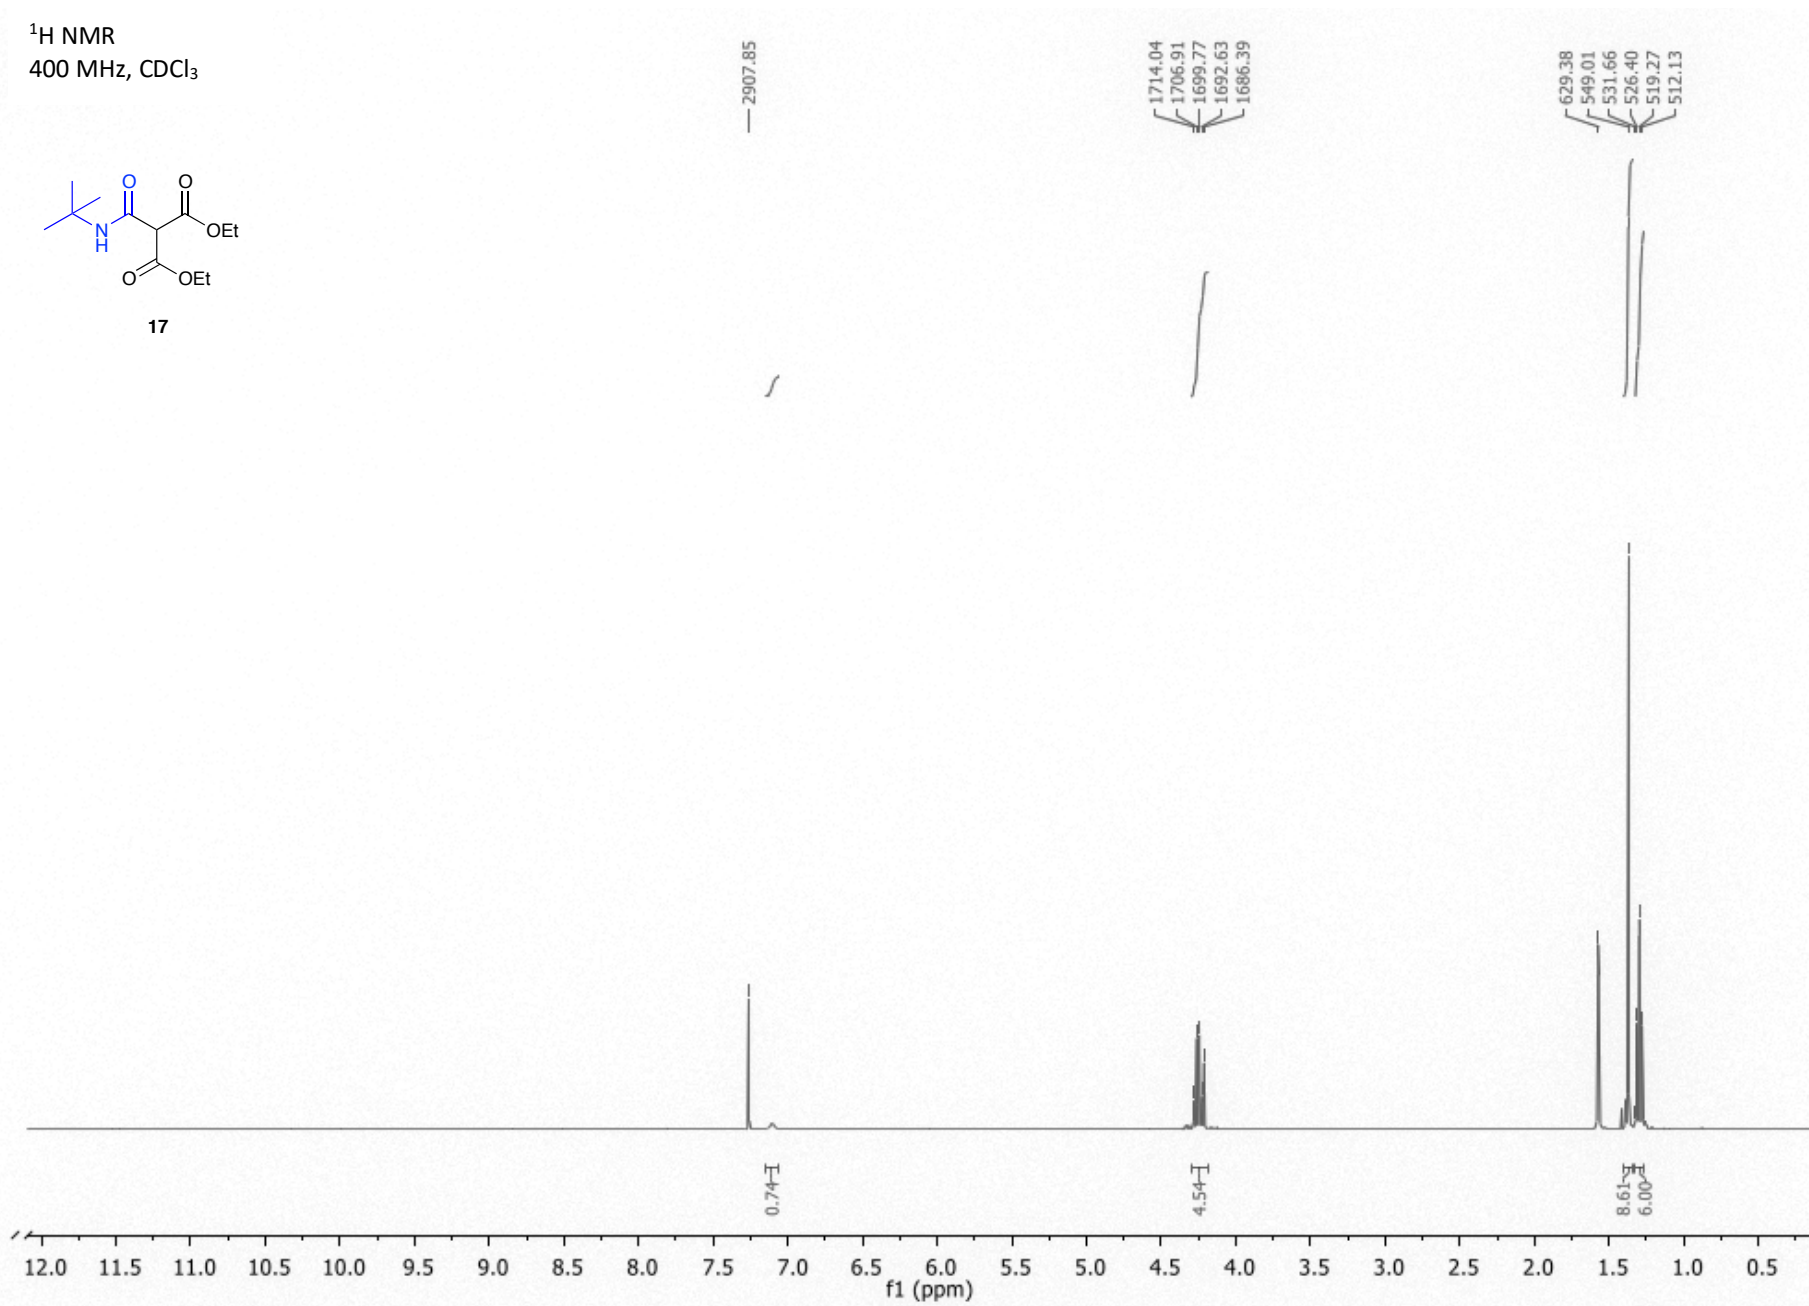

<sup>13</sup>C NMR  
100 MHz, CDCl<sub>3</sub>

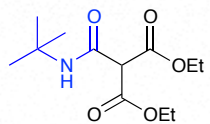

17

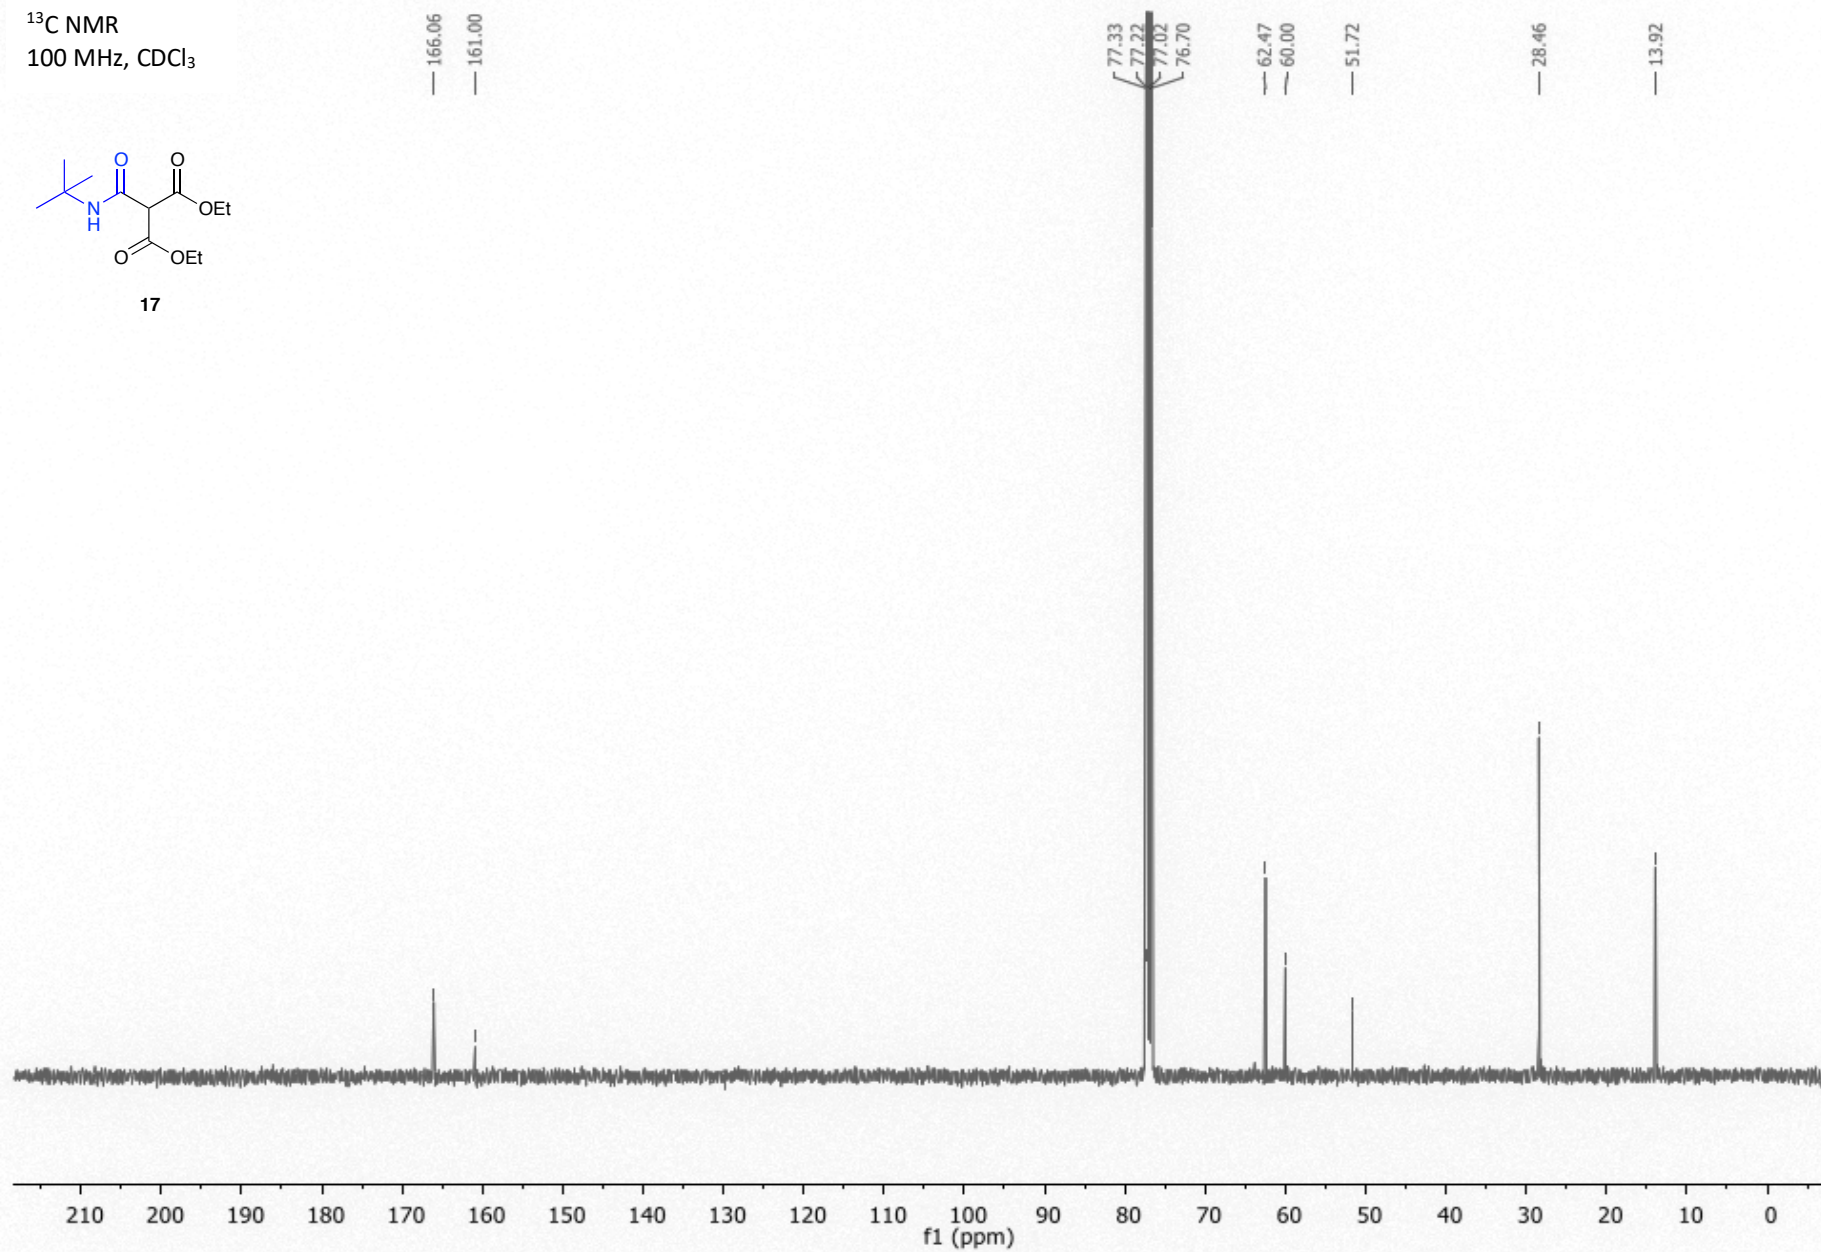



<sup>1</sup>H NMR  
400 MHz, CDCl<sub>3</sub>

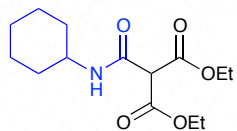

18

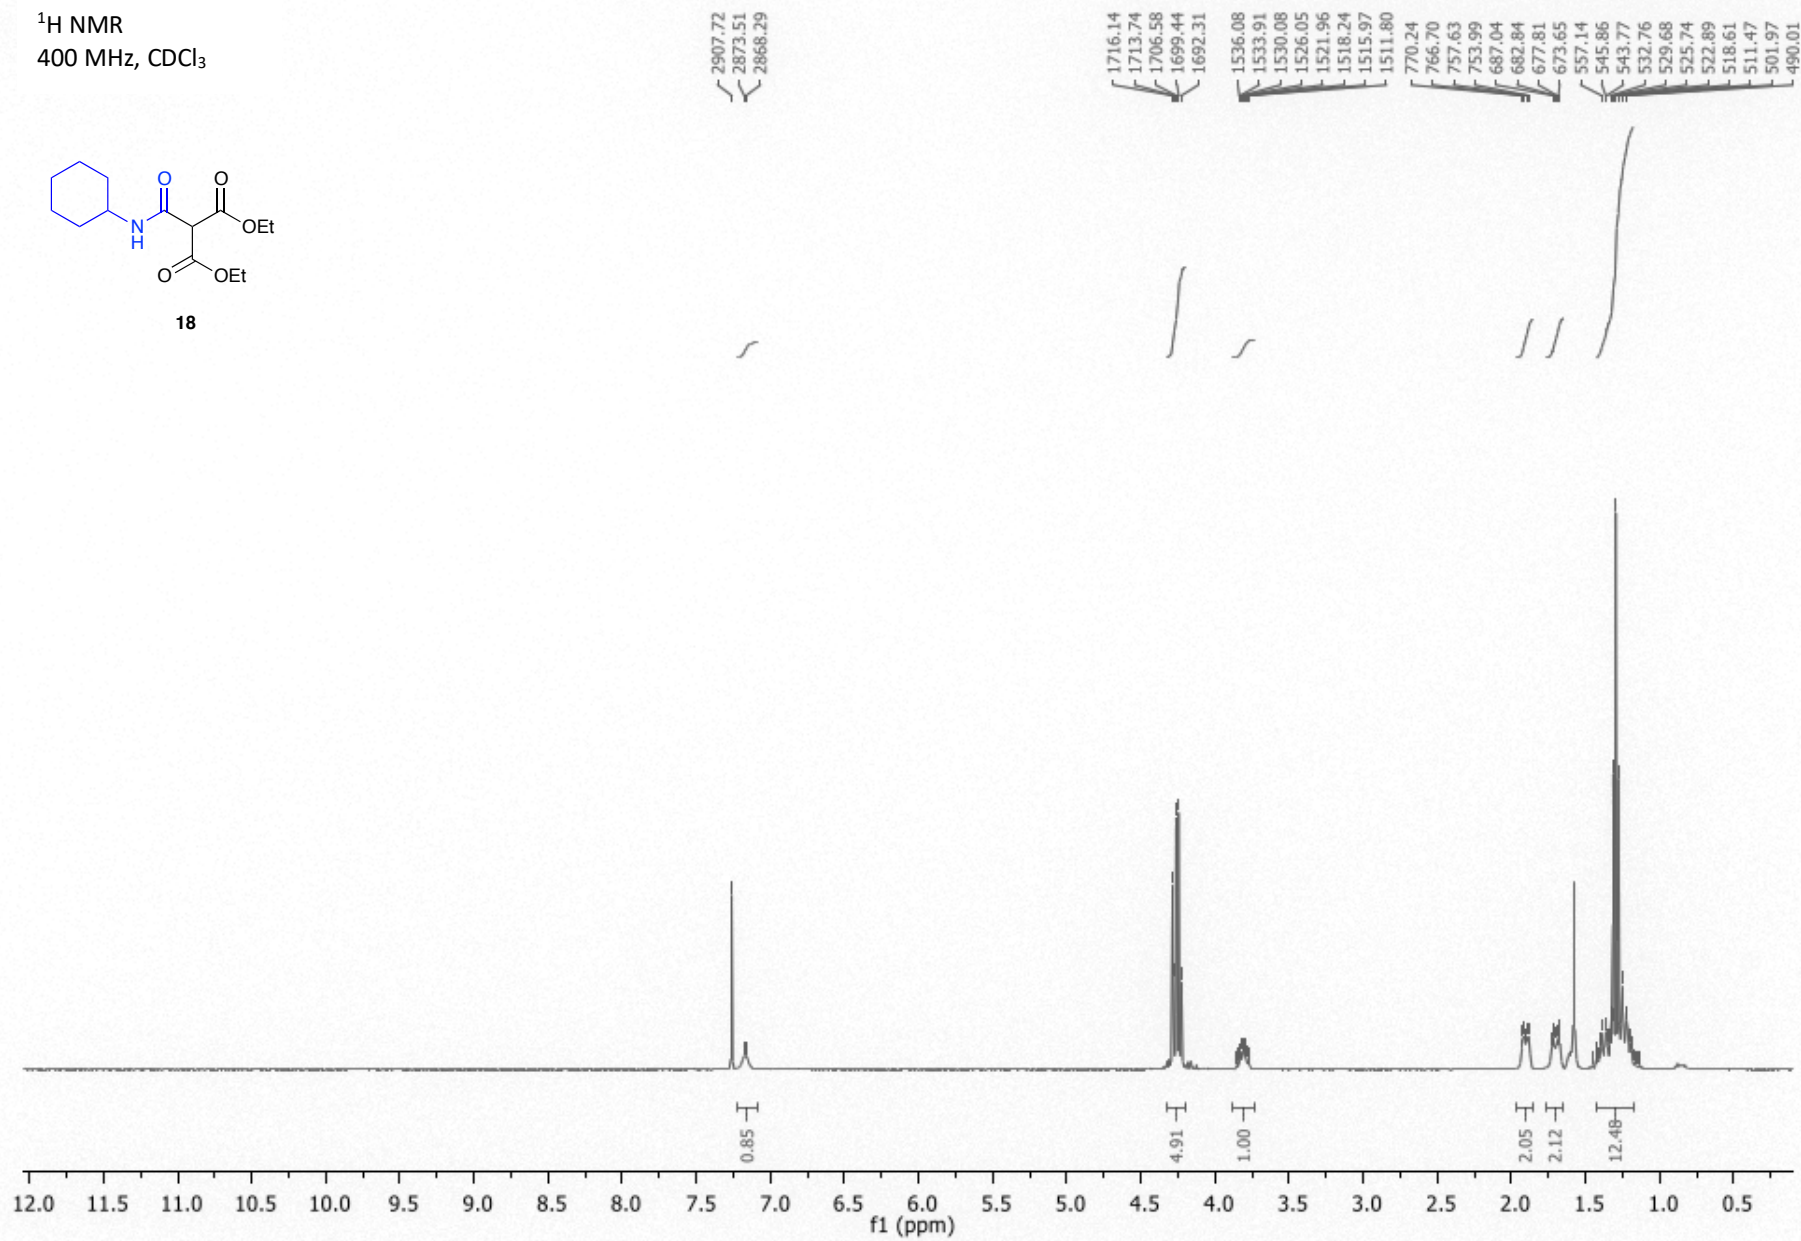

<sup>13</sup>C NMR  
100 MHz, CDCl<sub>3</sub>

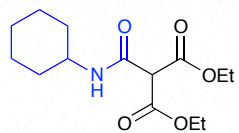

**18**

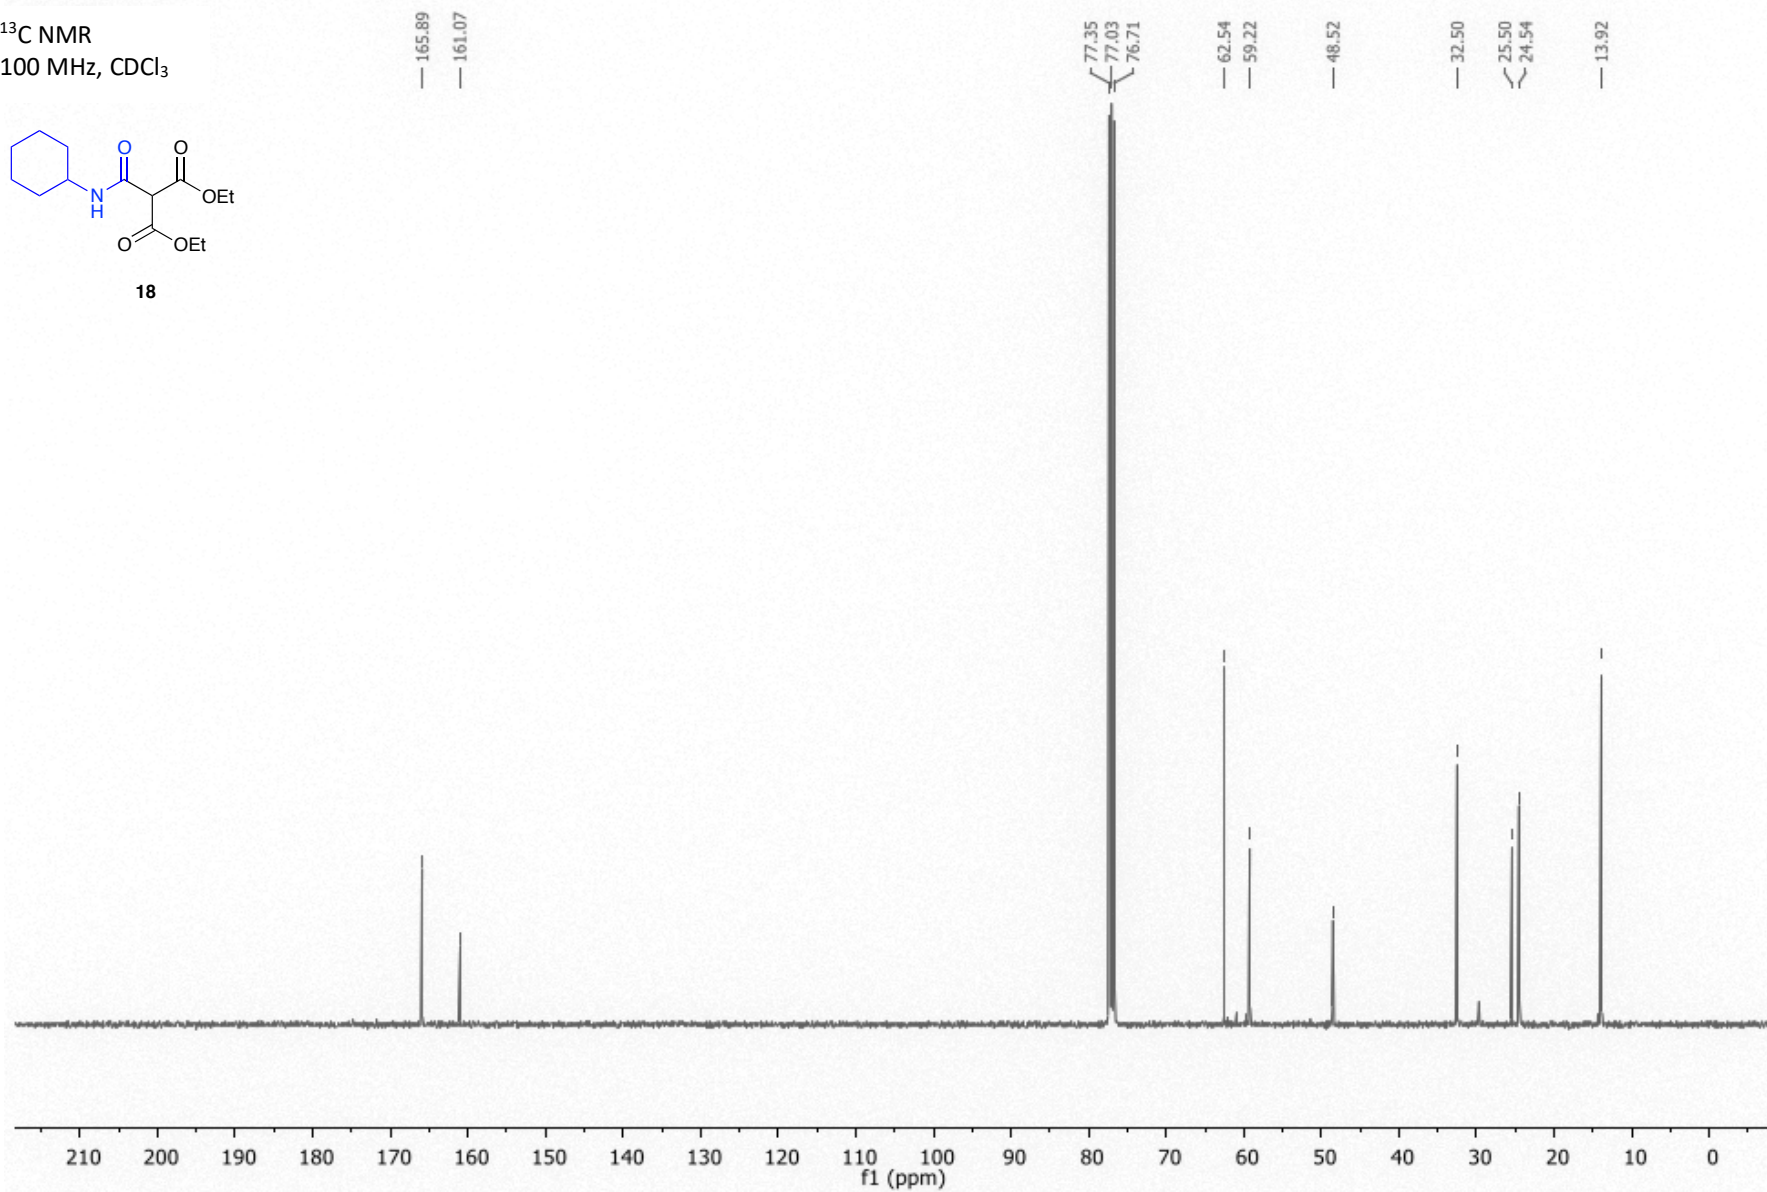



<sup>1</sup>H NMR  
400 MHz, CDCl<sub>3</sub>

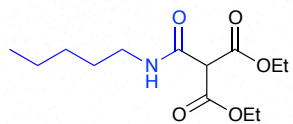

19

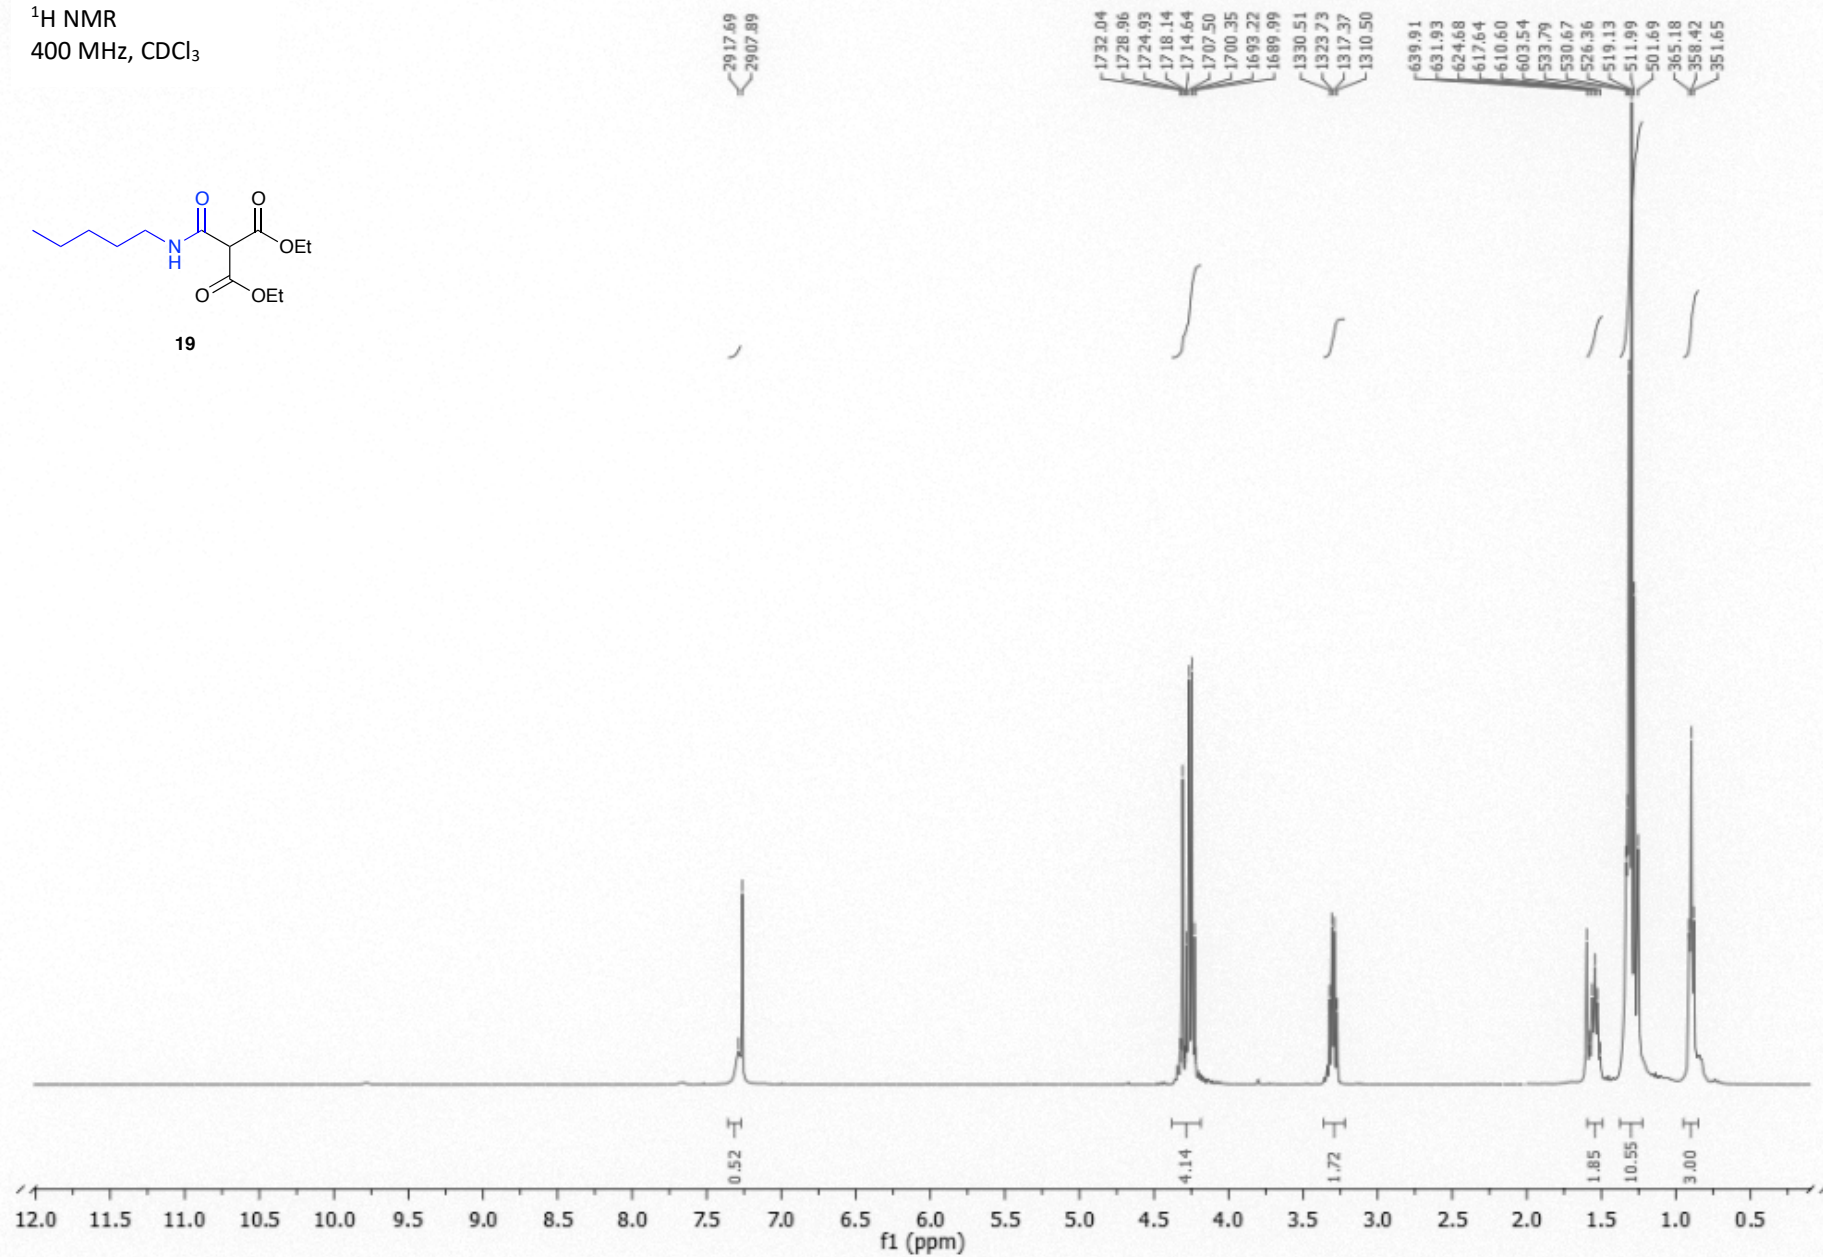

<sup>13</sup>C NMR  
100 MHz, CDCl<sub>3</sub>

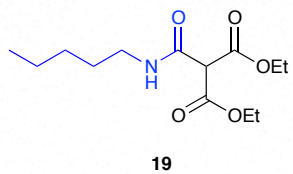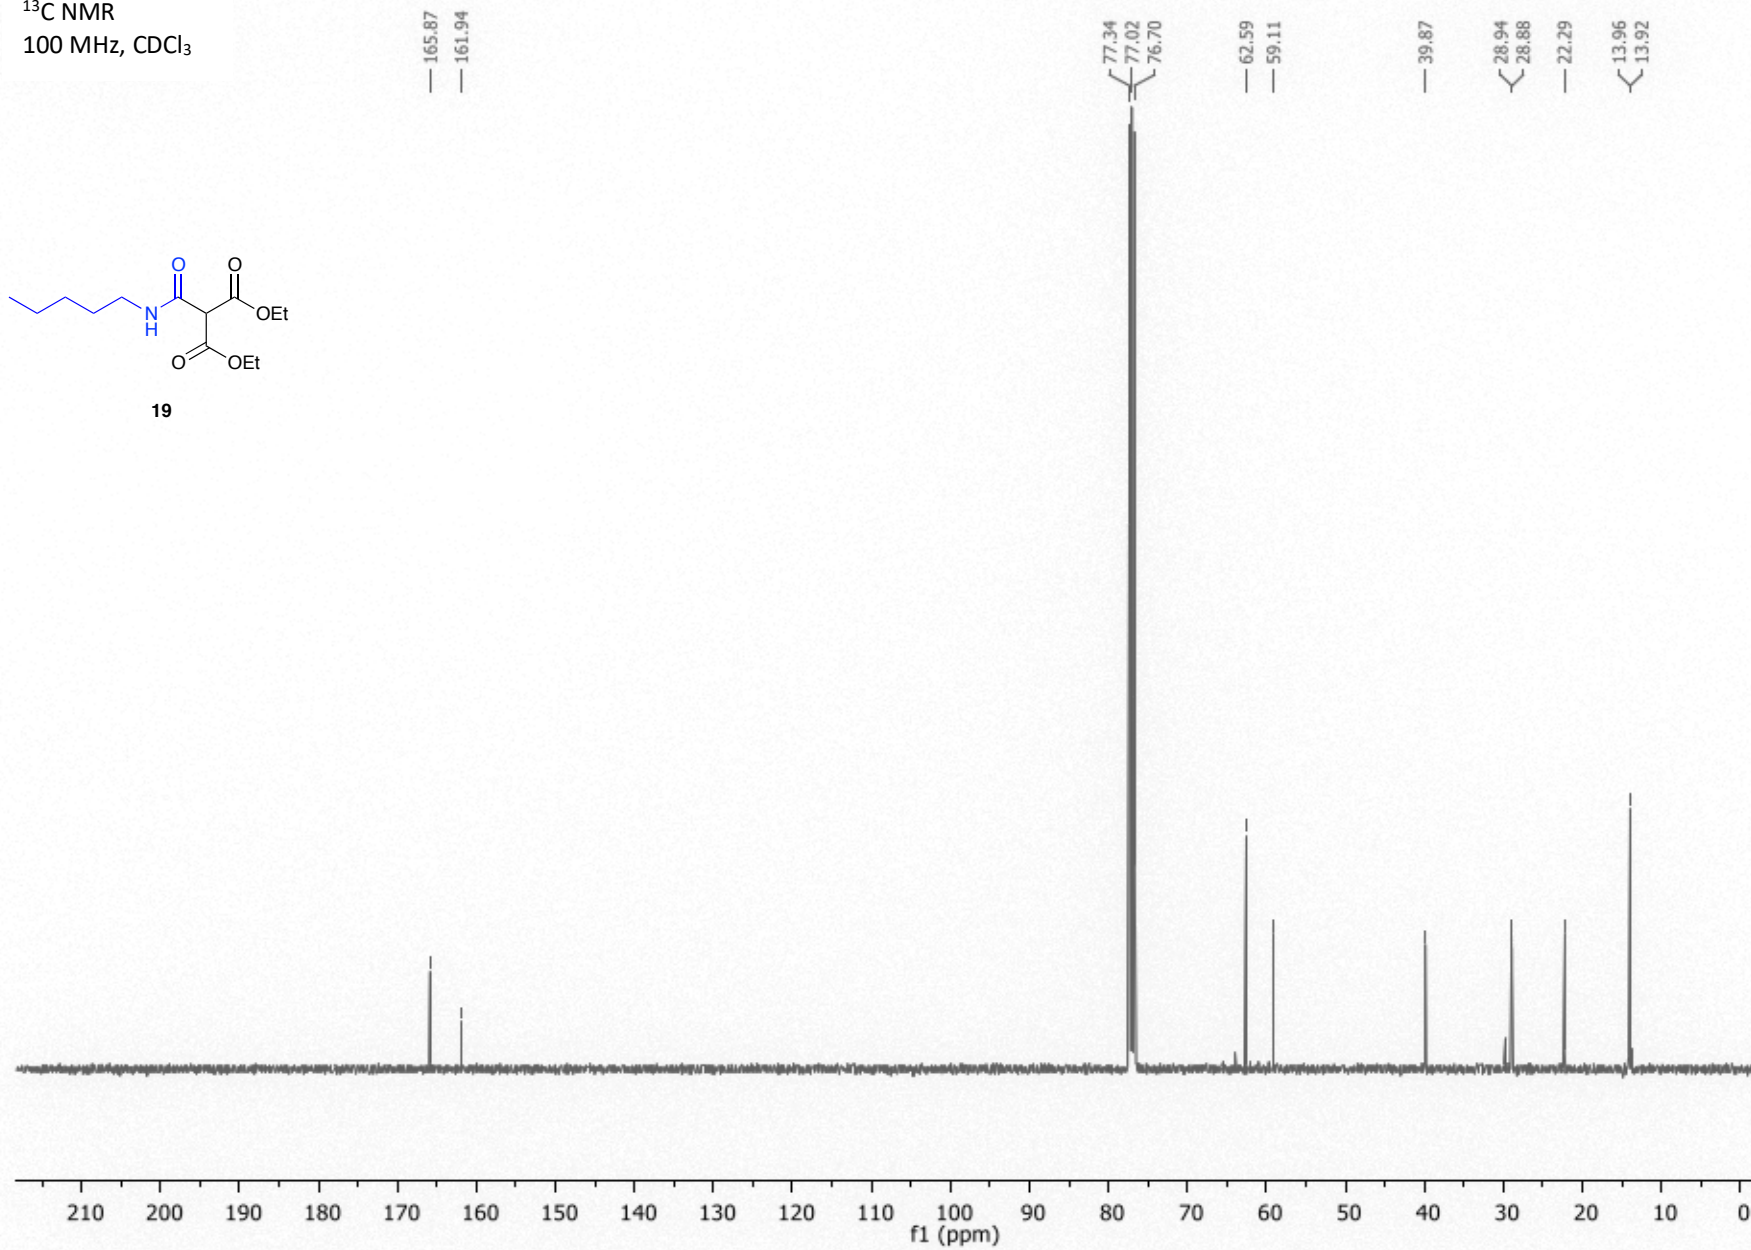





<sup>13</sup>C NMR  
100 MHz, CDCl<sub>3</sub>

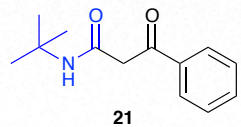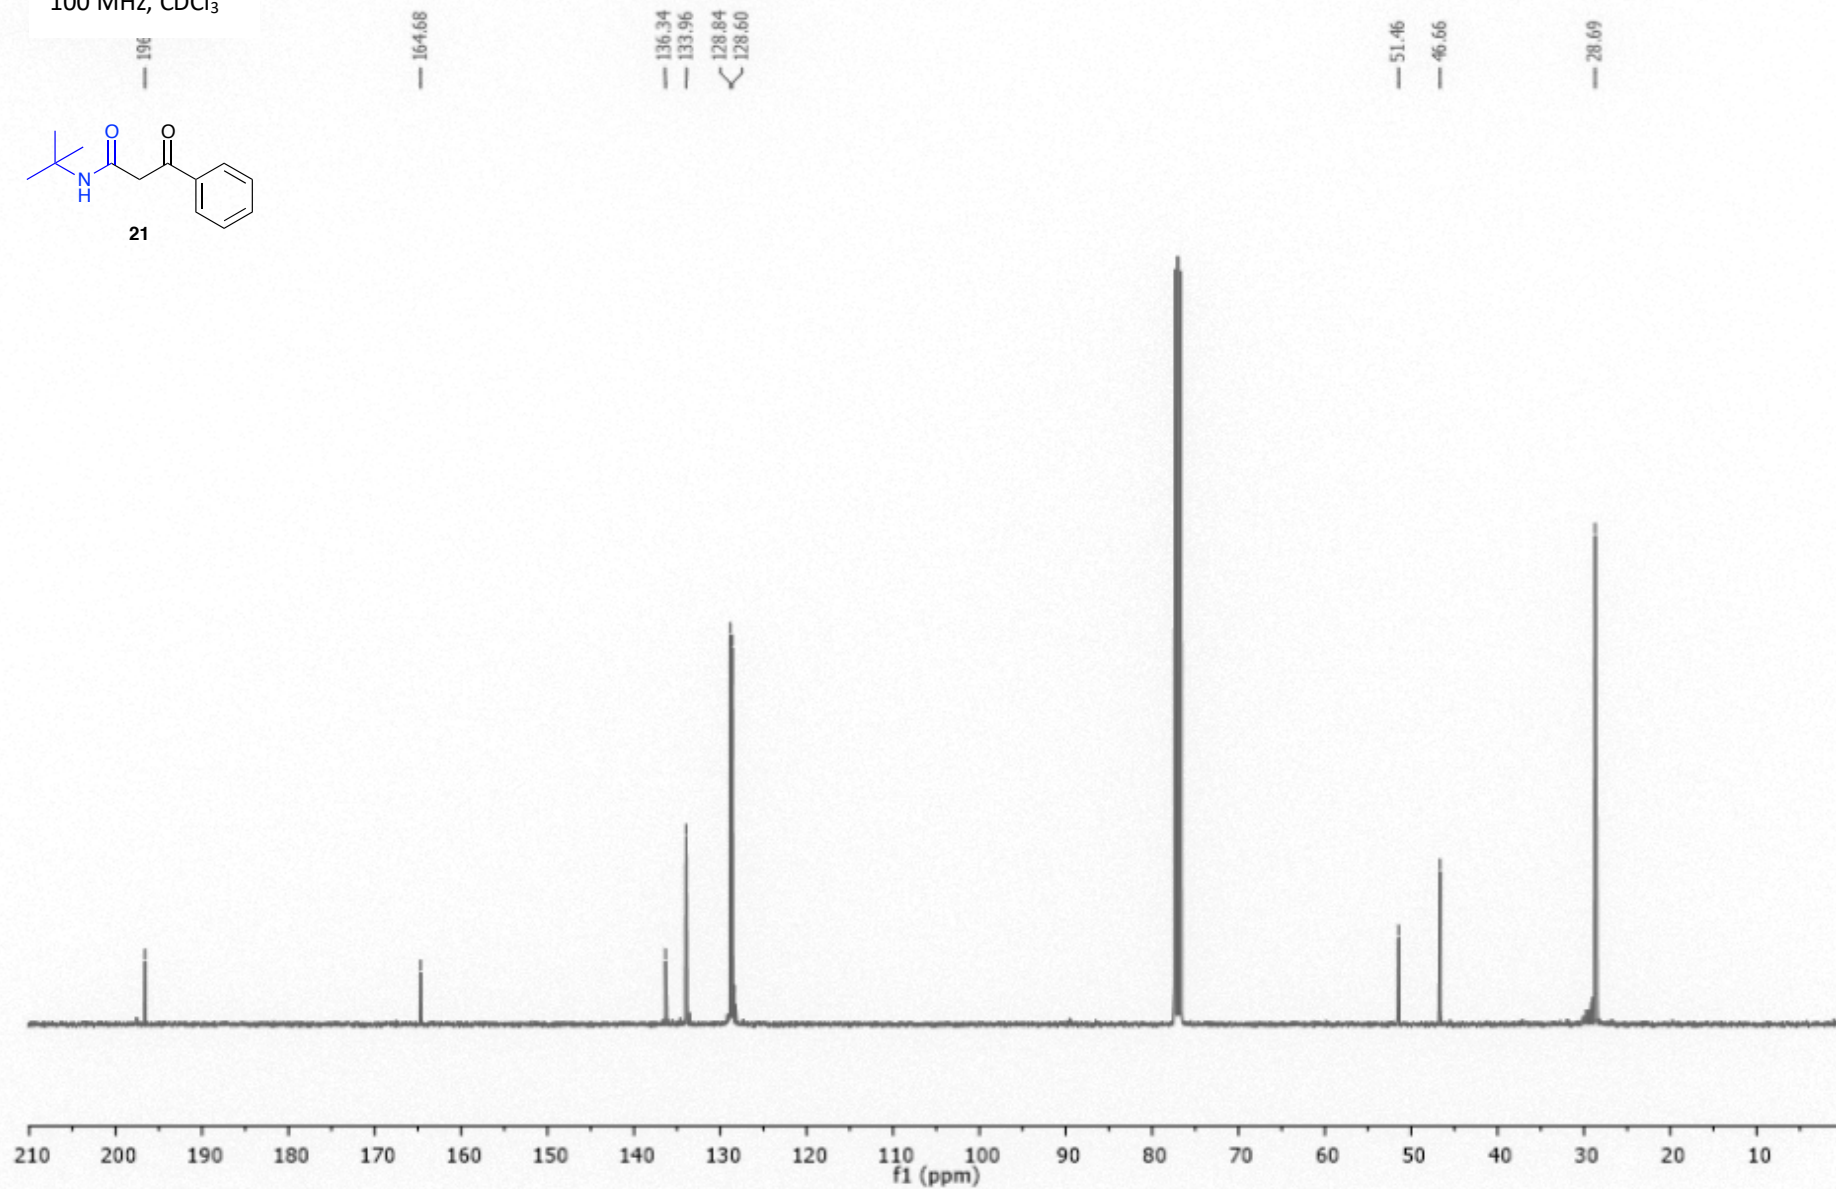



<sup>1</sup>H NMR  
400 MHz, CDCl<sub>3</sub>

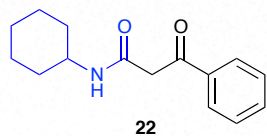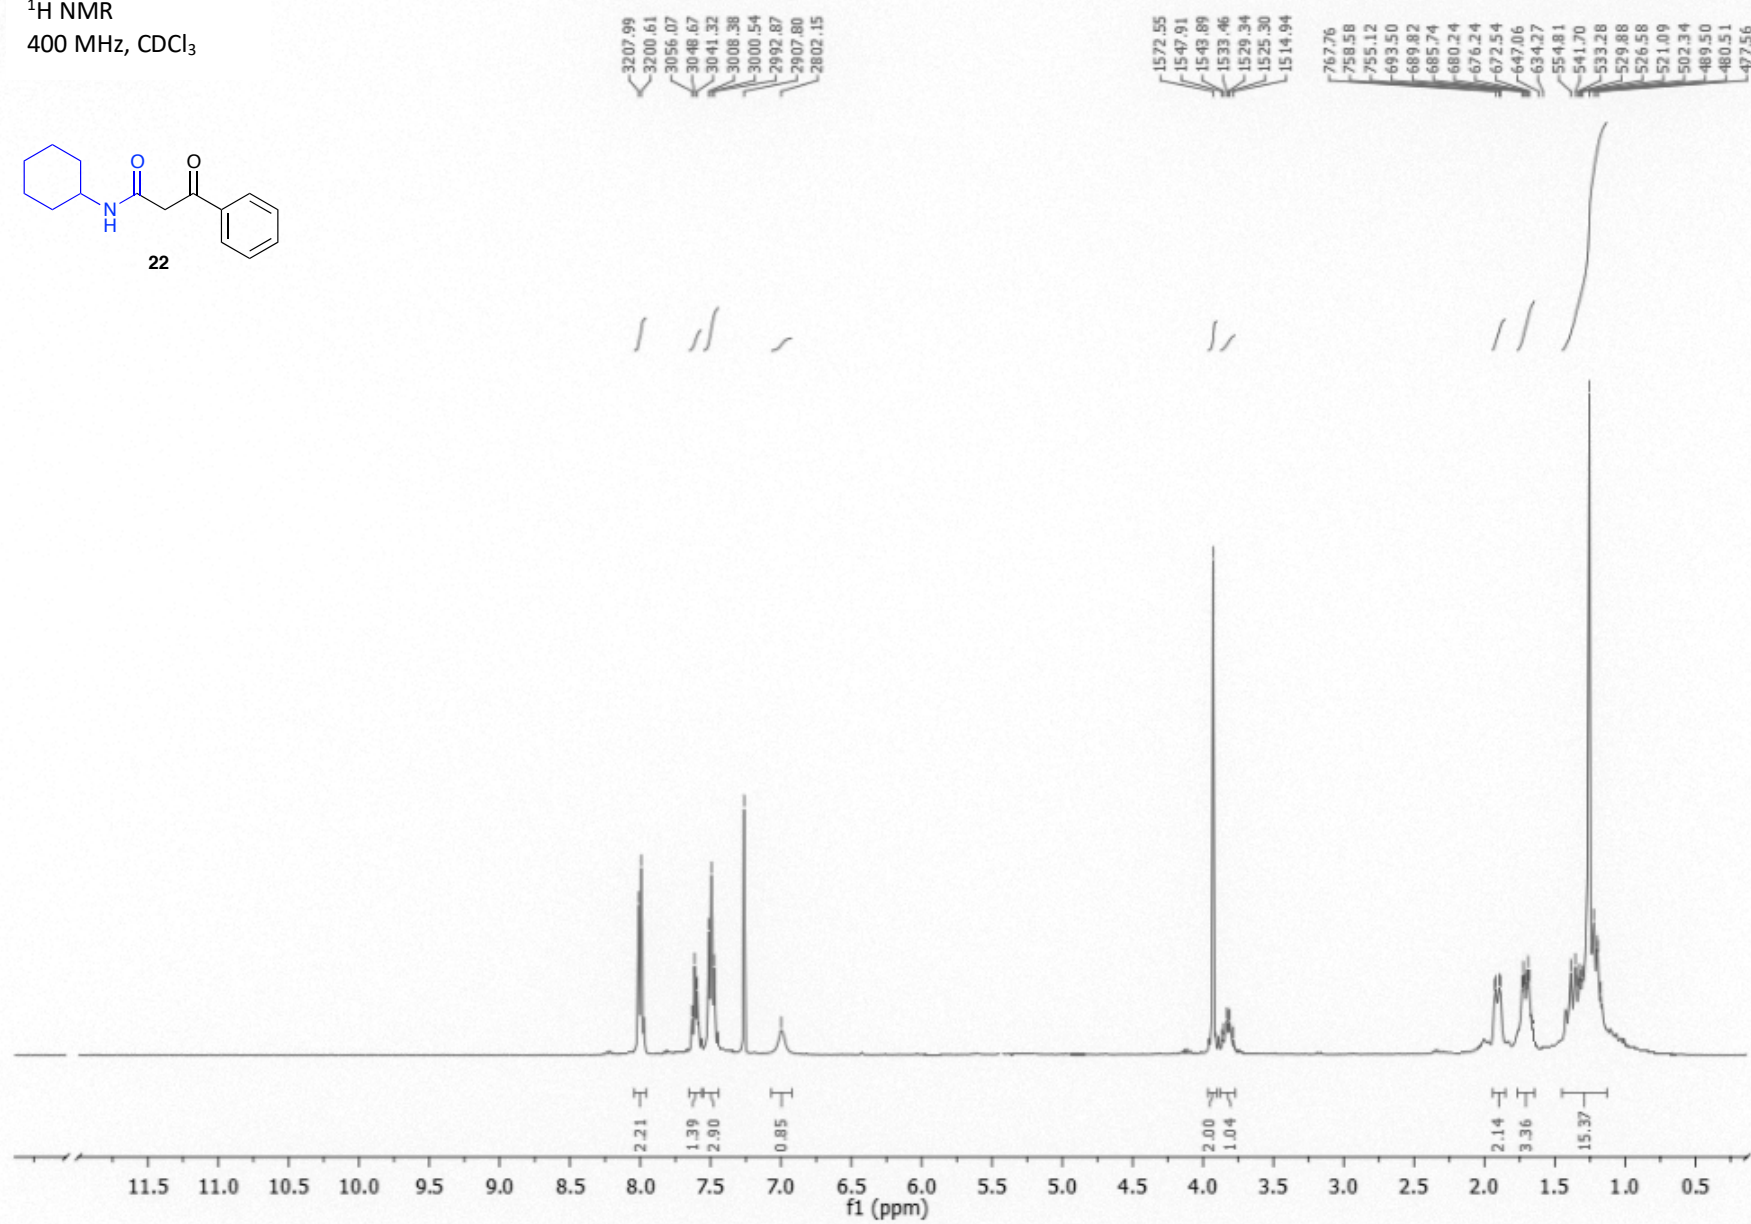

$^{13}\text{C}$  NMR  
100 MHz,  $\text{CDCl}_3$

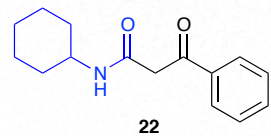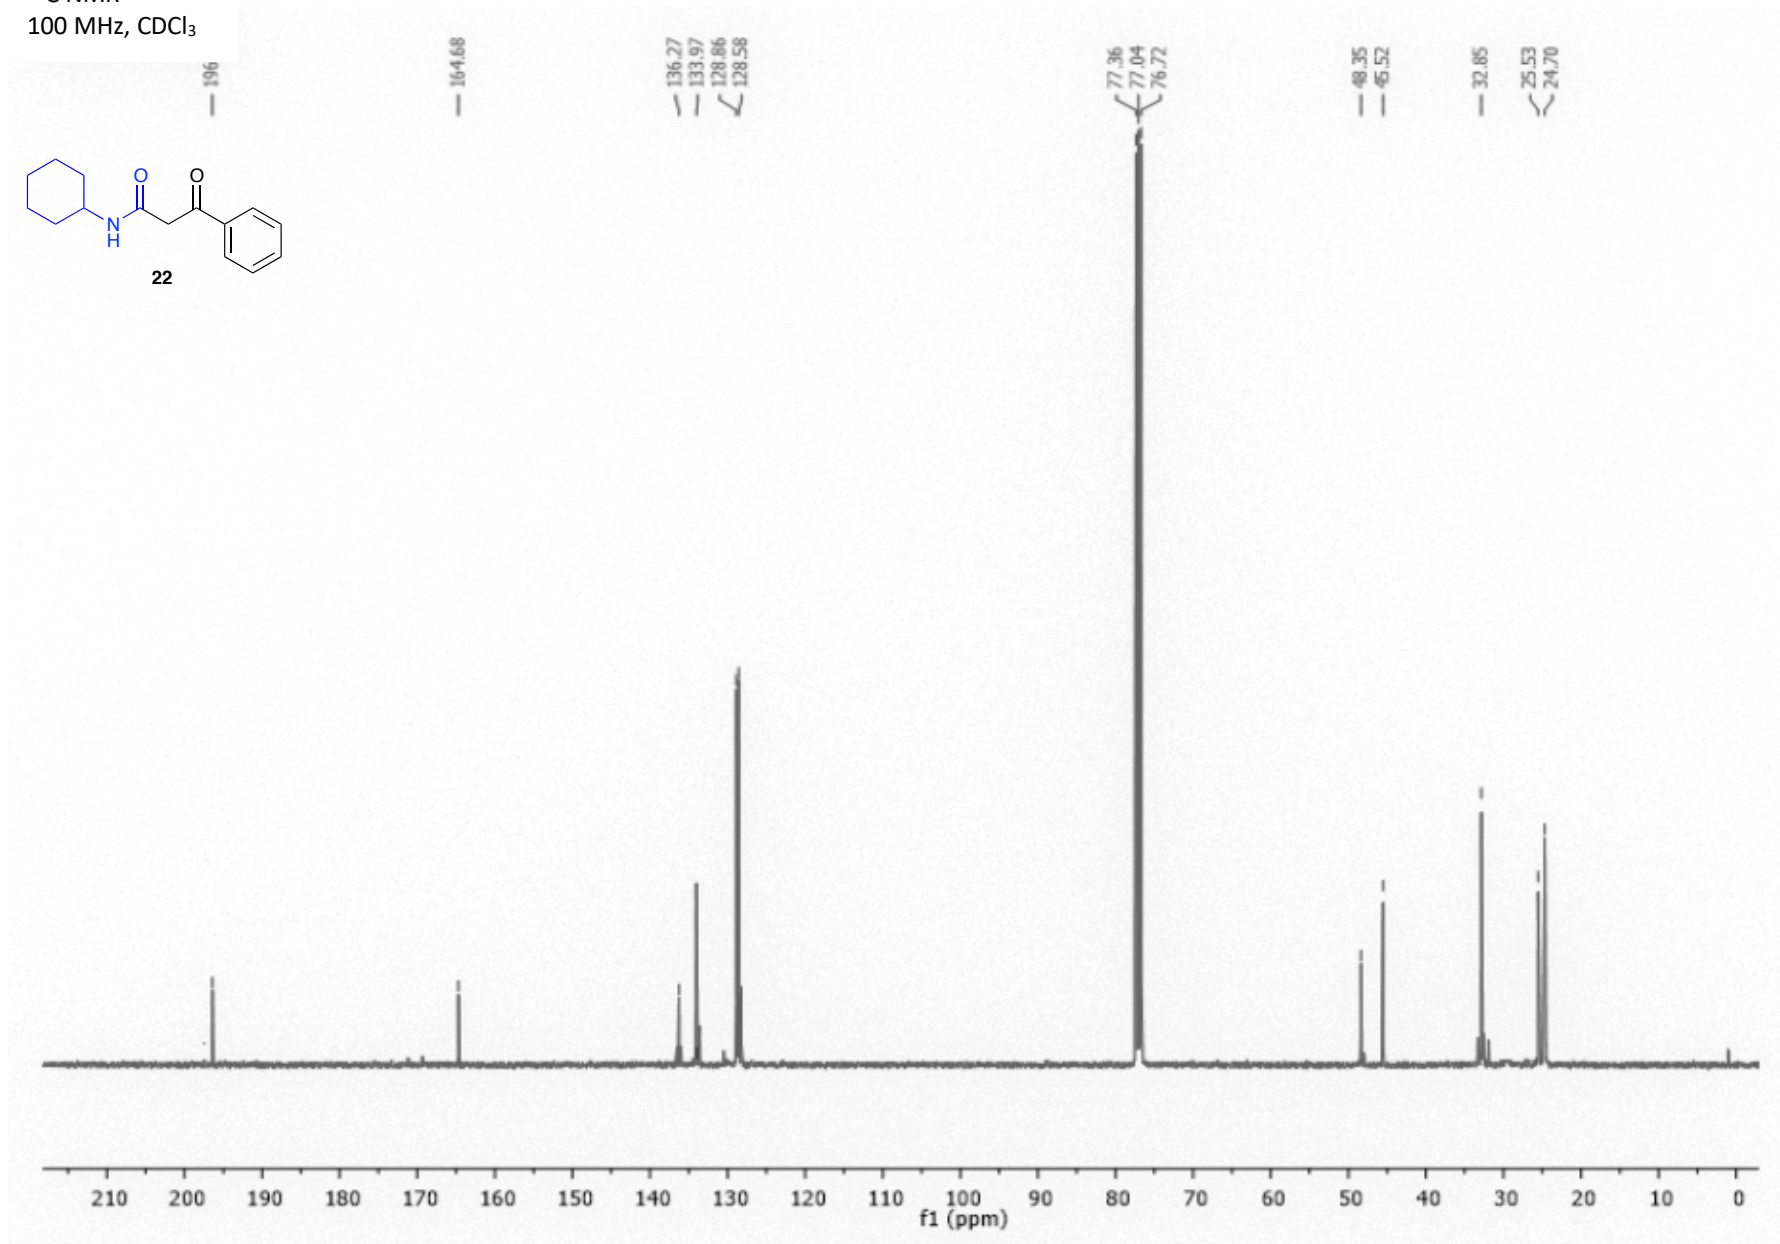

<sup>1</sup>H NMR  
400 MHz, CDCl<sub>3</sub>

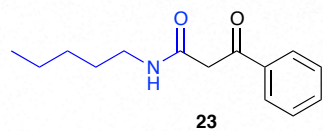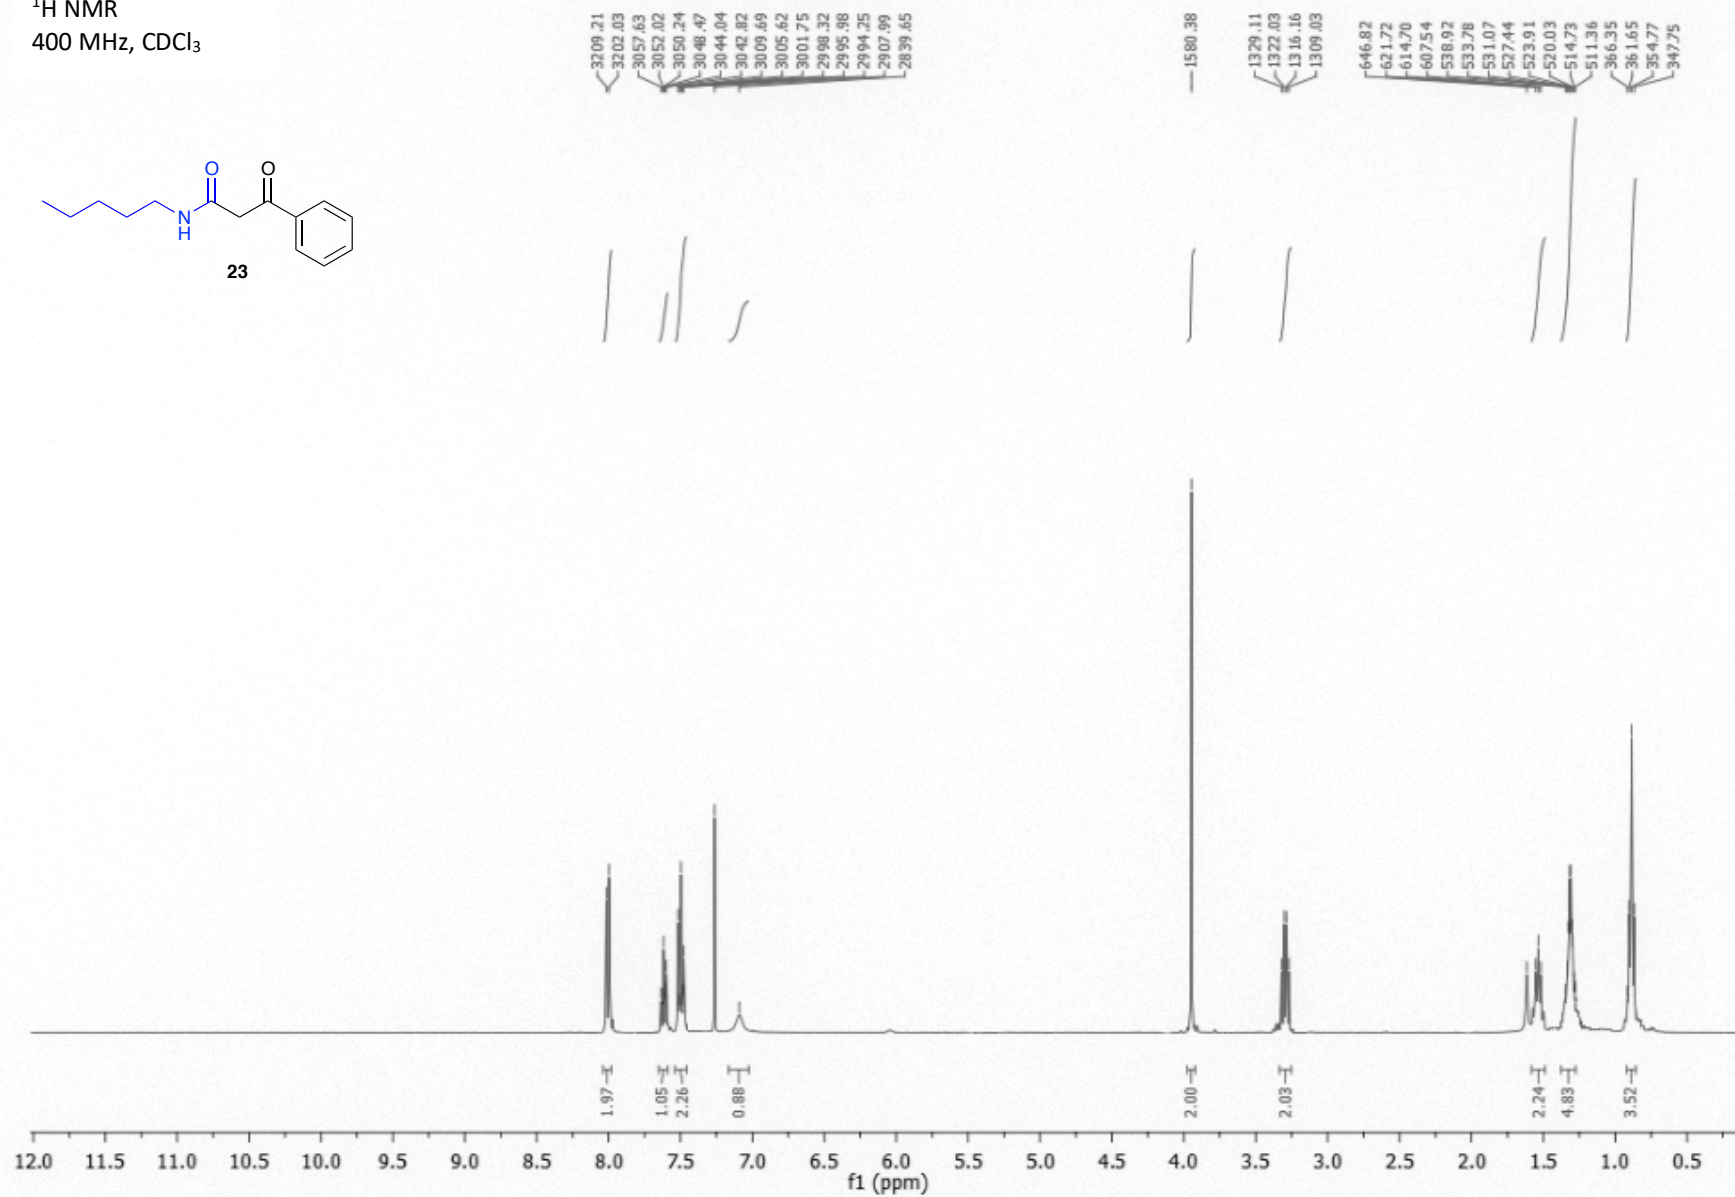



<sup>13</sup>C NMR  
100 MHz, CDCl<sub>3</sub>

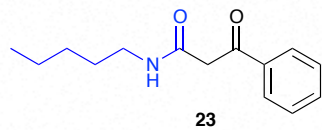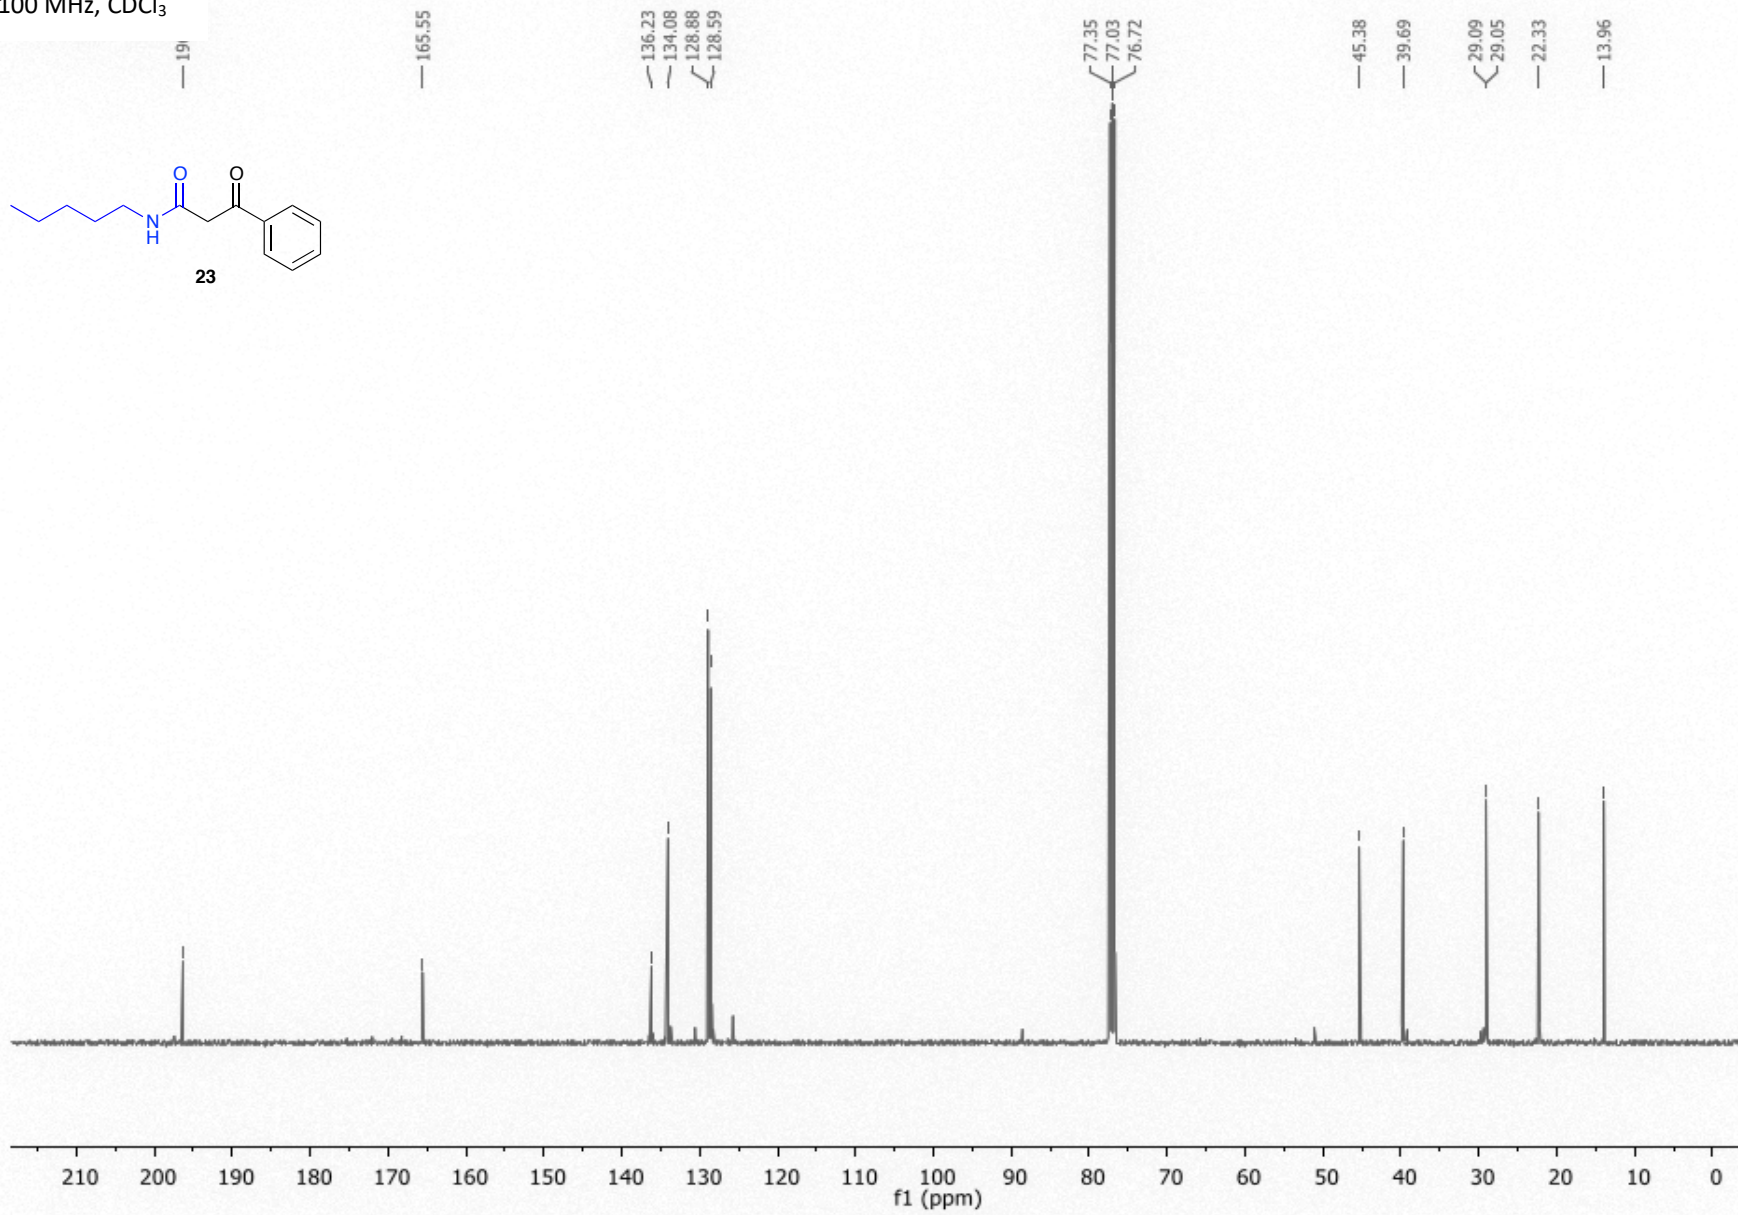



<sup>1</sup>H NMR  
400 MHz, CDCl<sub>3</sub>

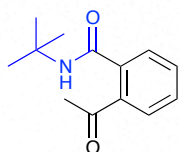

25

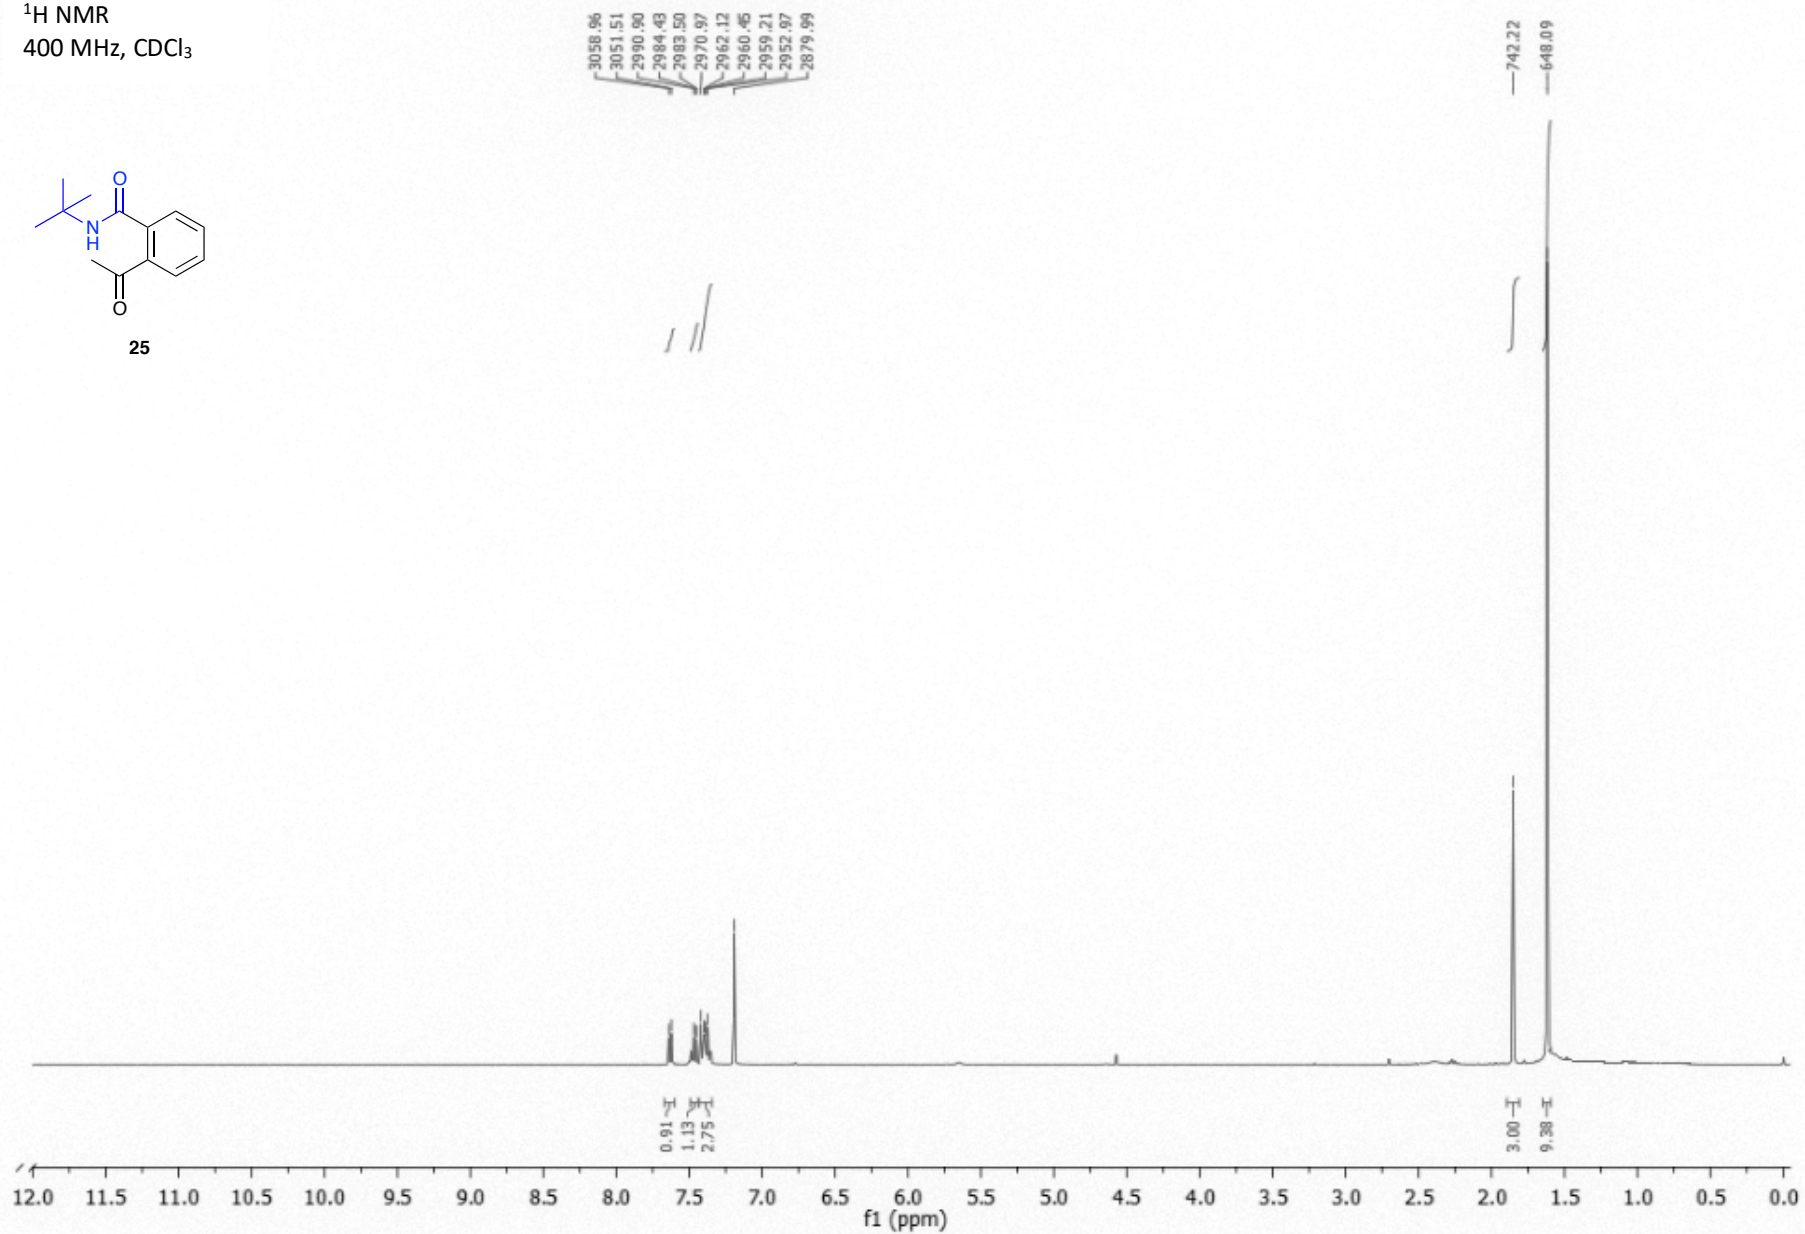

$^{13}\text{C}$  NMR  
100 MHz,  $\text{CDCl}_3$

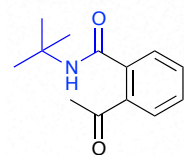

25

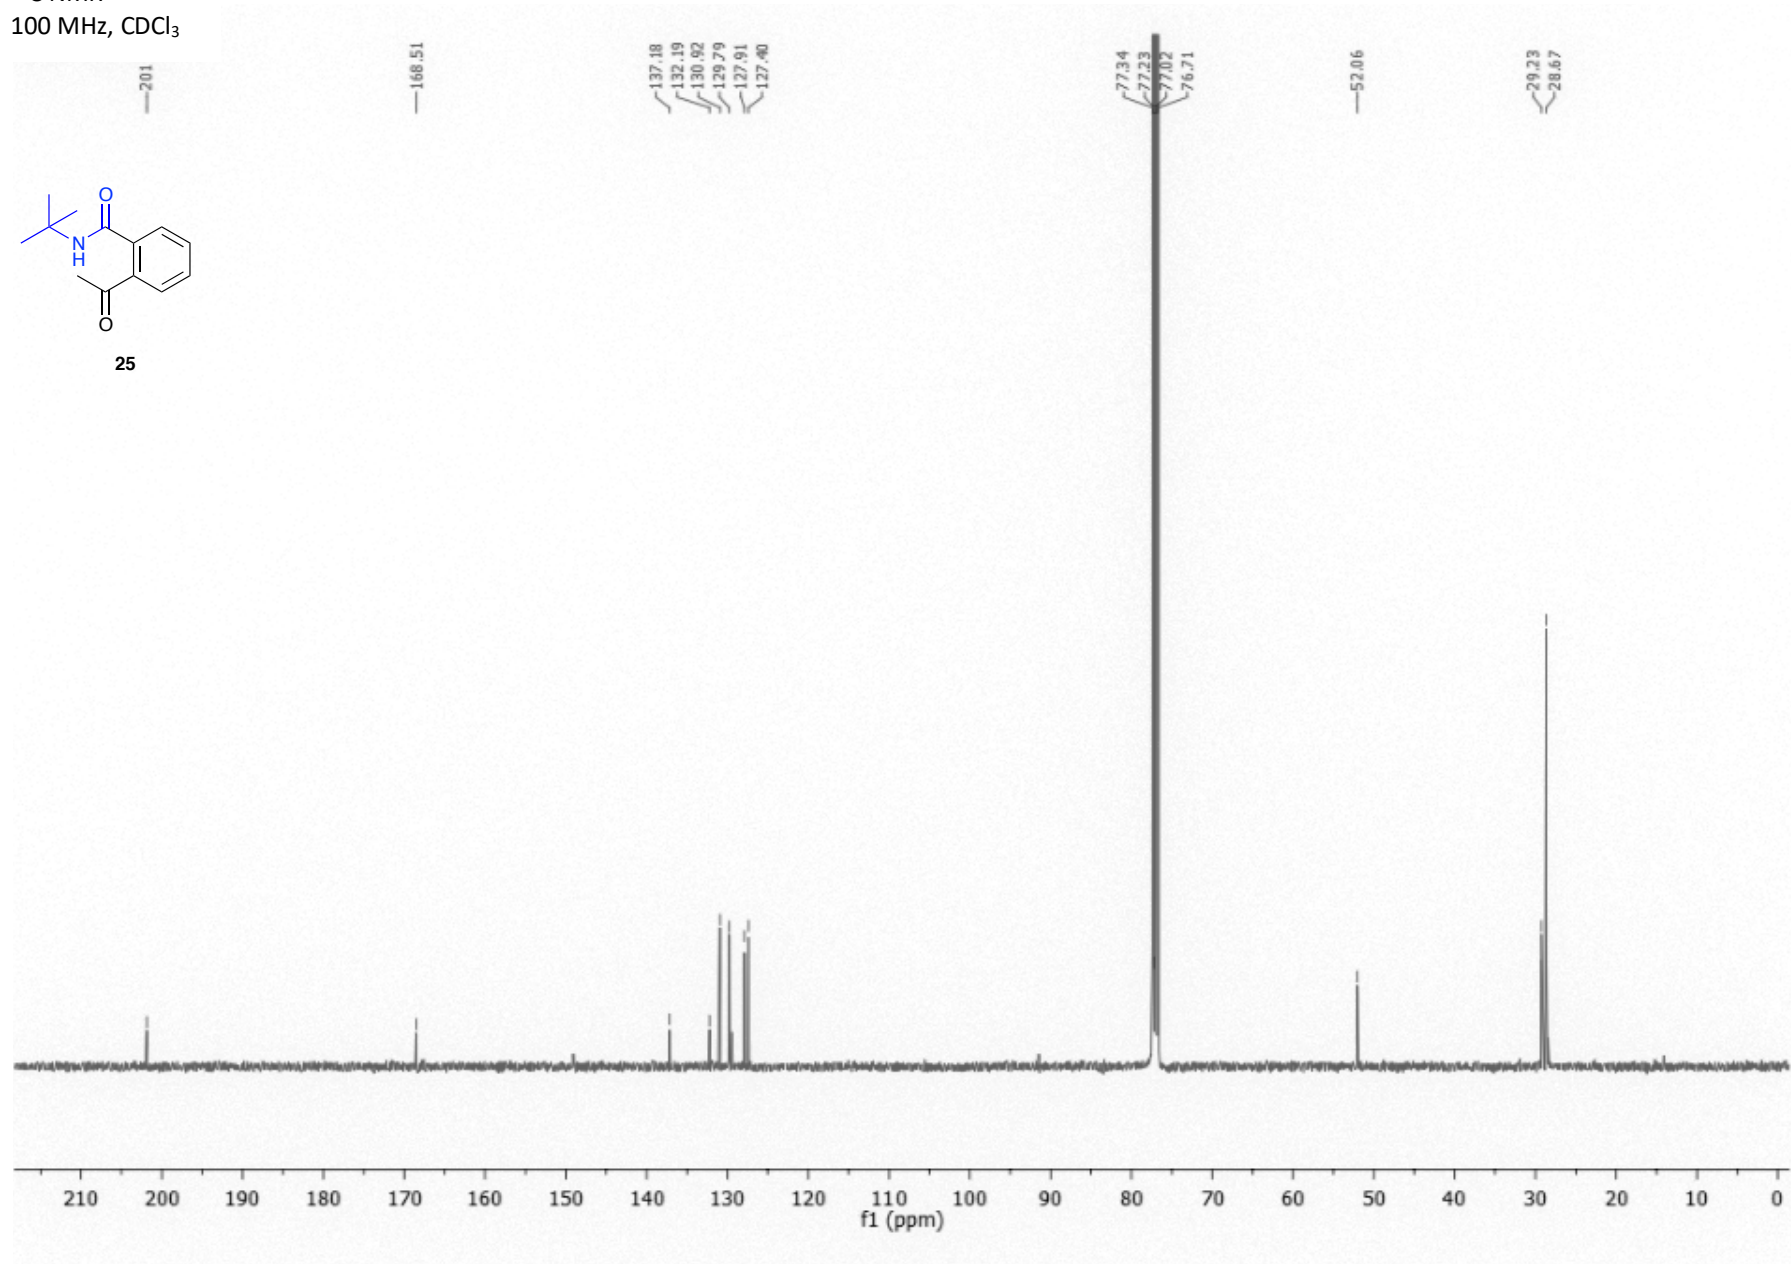

<sup>1</sup>H NMR  
400 MHz, CD<sub>3</sub>OD

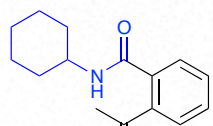

26

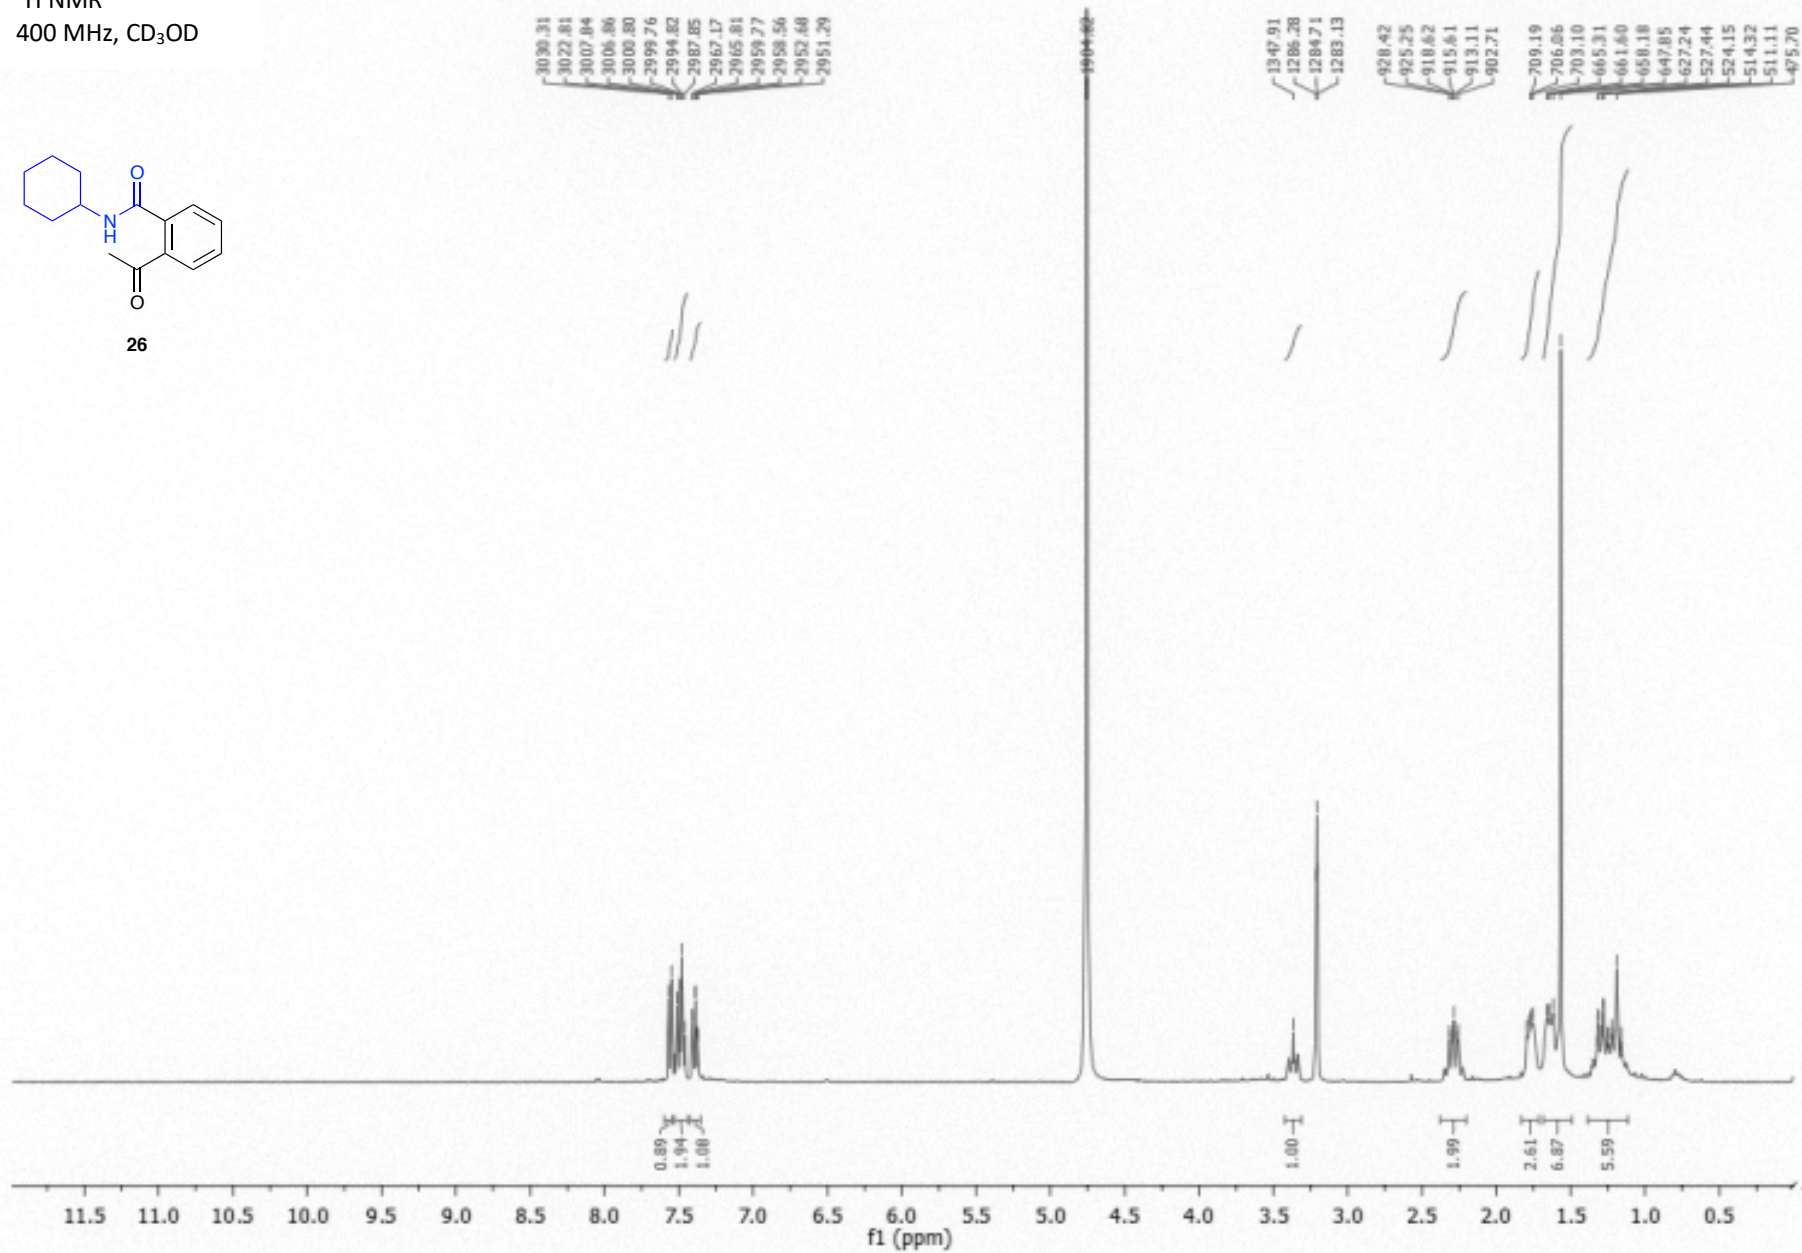



<sup>13</sup>C NMR  
100 MHz, CD<sub>3</sub>OD

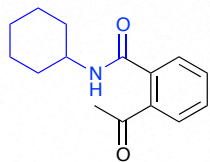

26

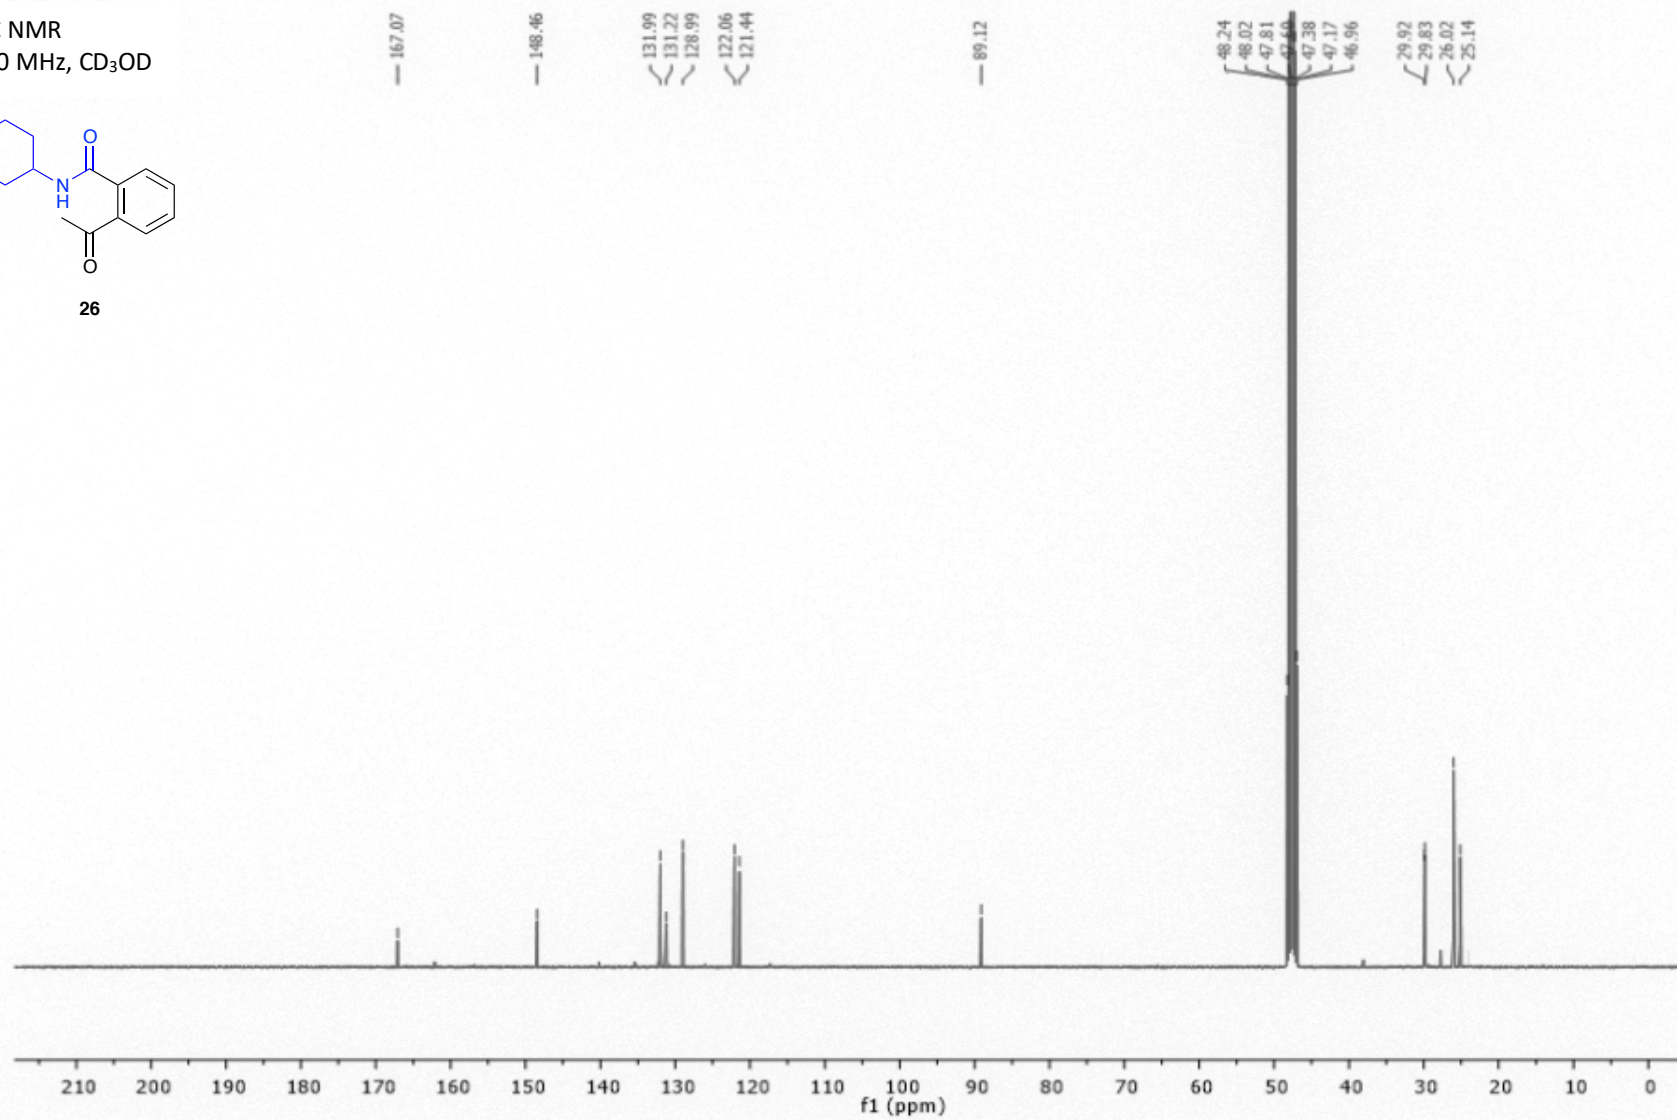



<sup>1</sup>H NMR  
400 MHz, CDCl<sub>3</sub>

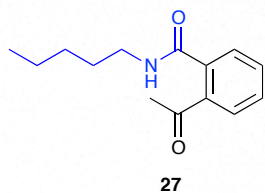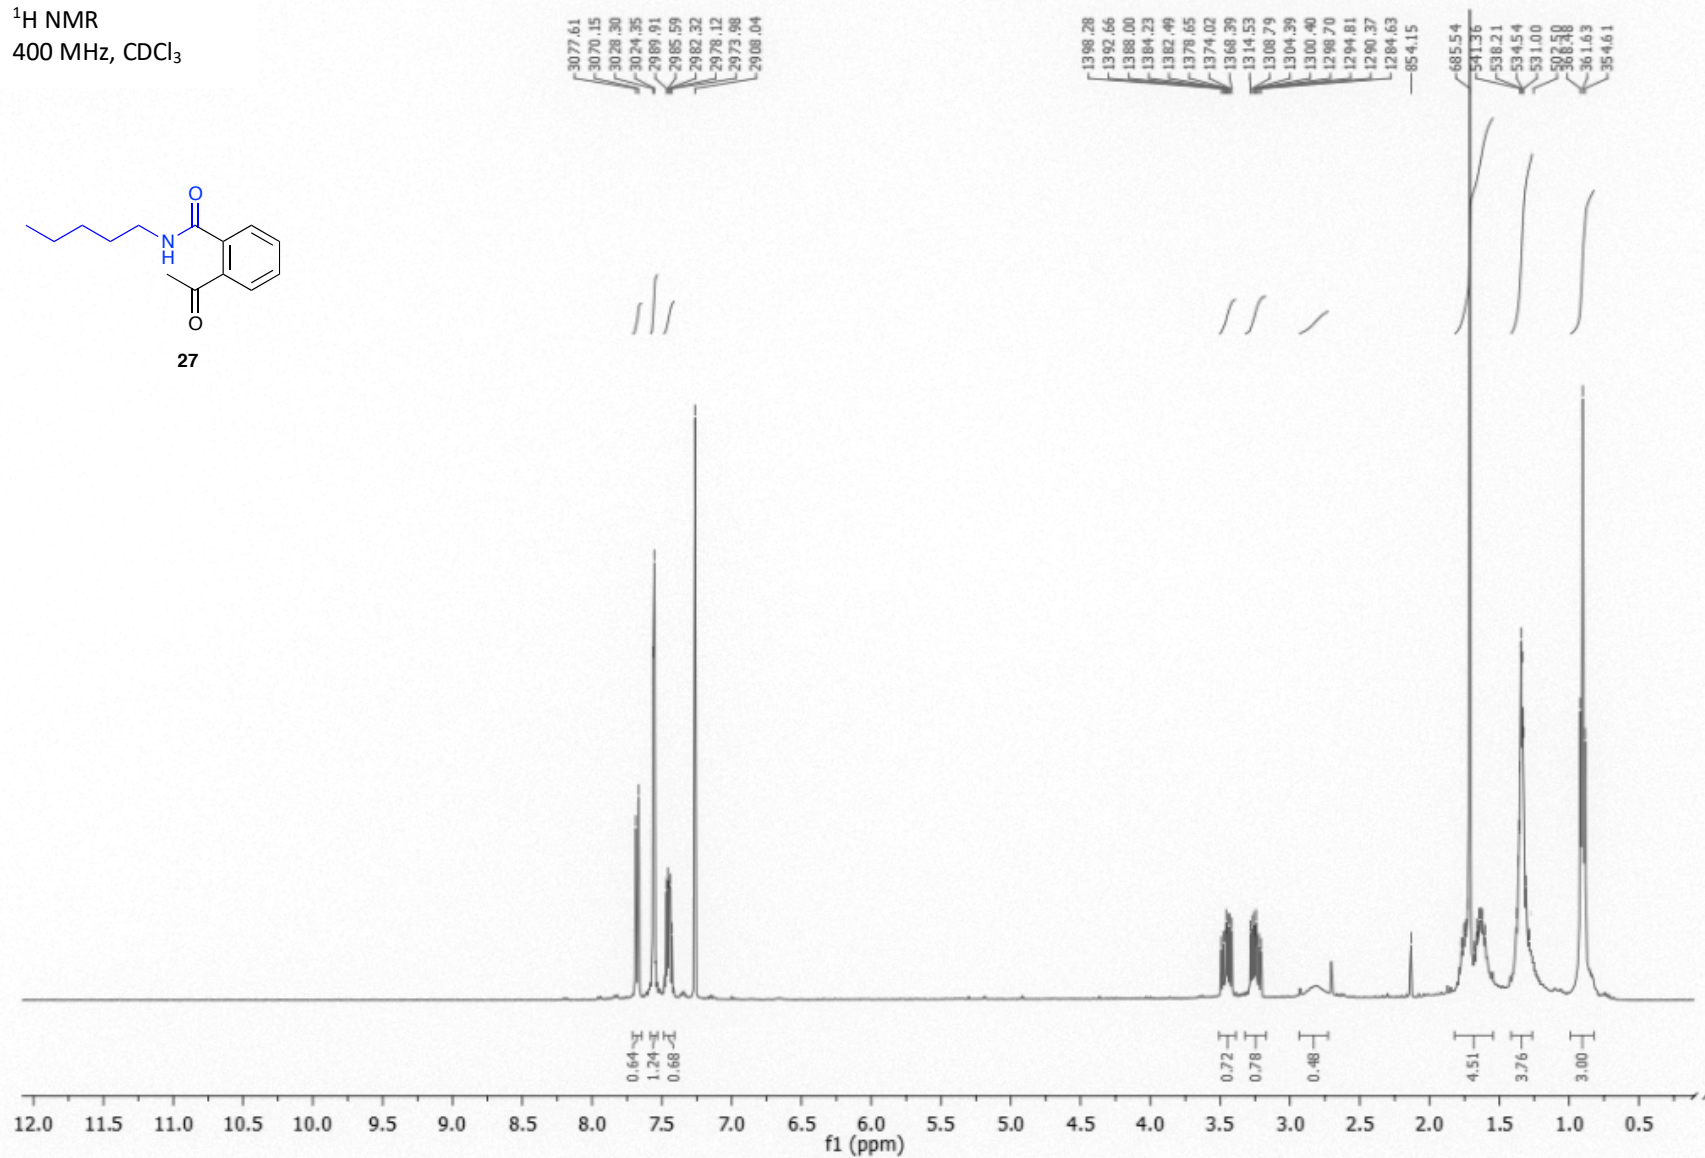

<sup>13</sup>C NMR  
100 MHz, CDCl<sub>3</sub>

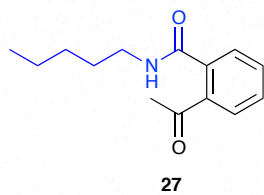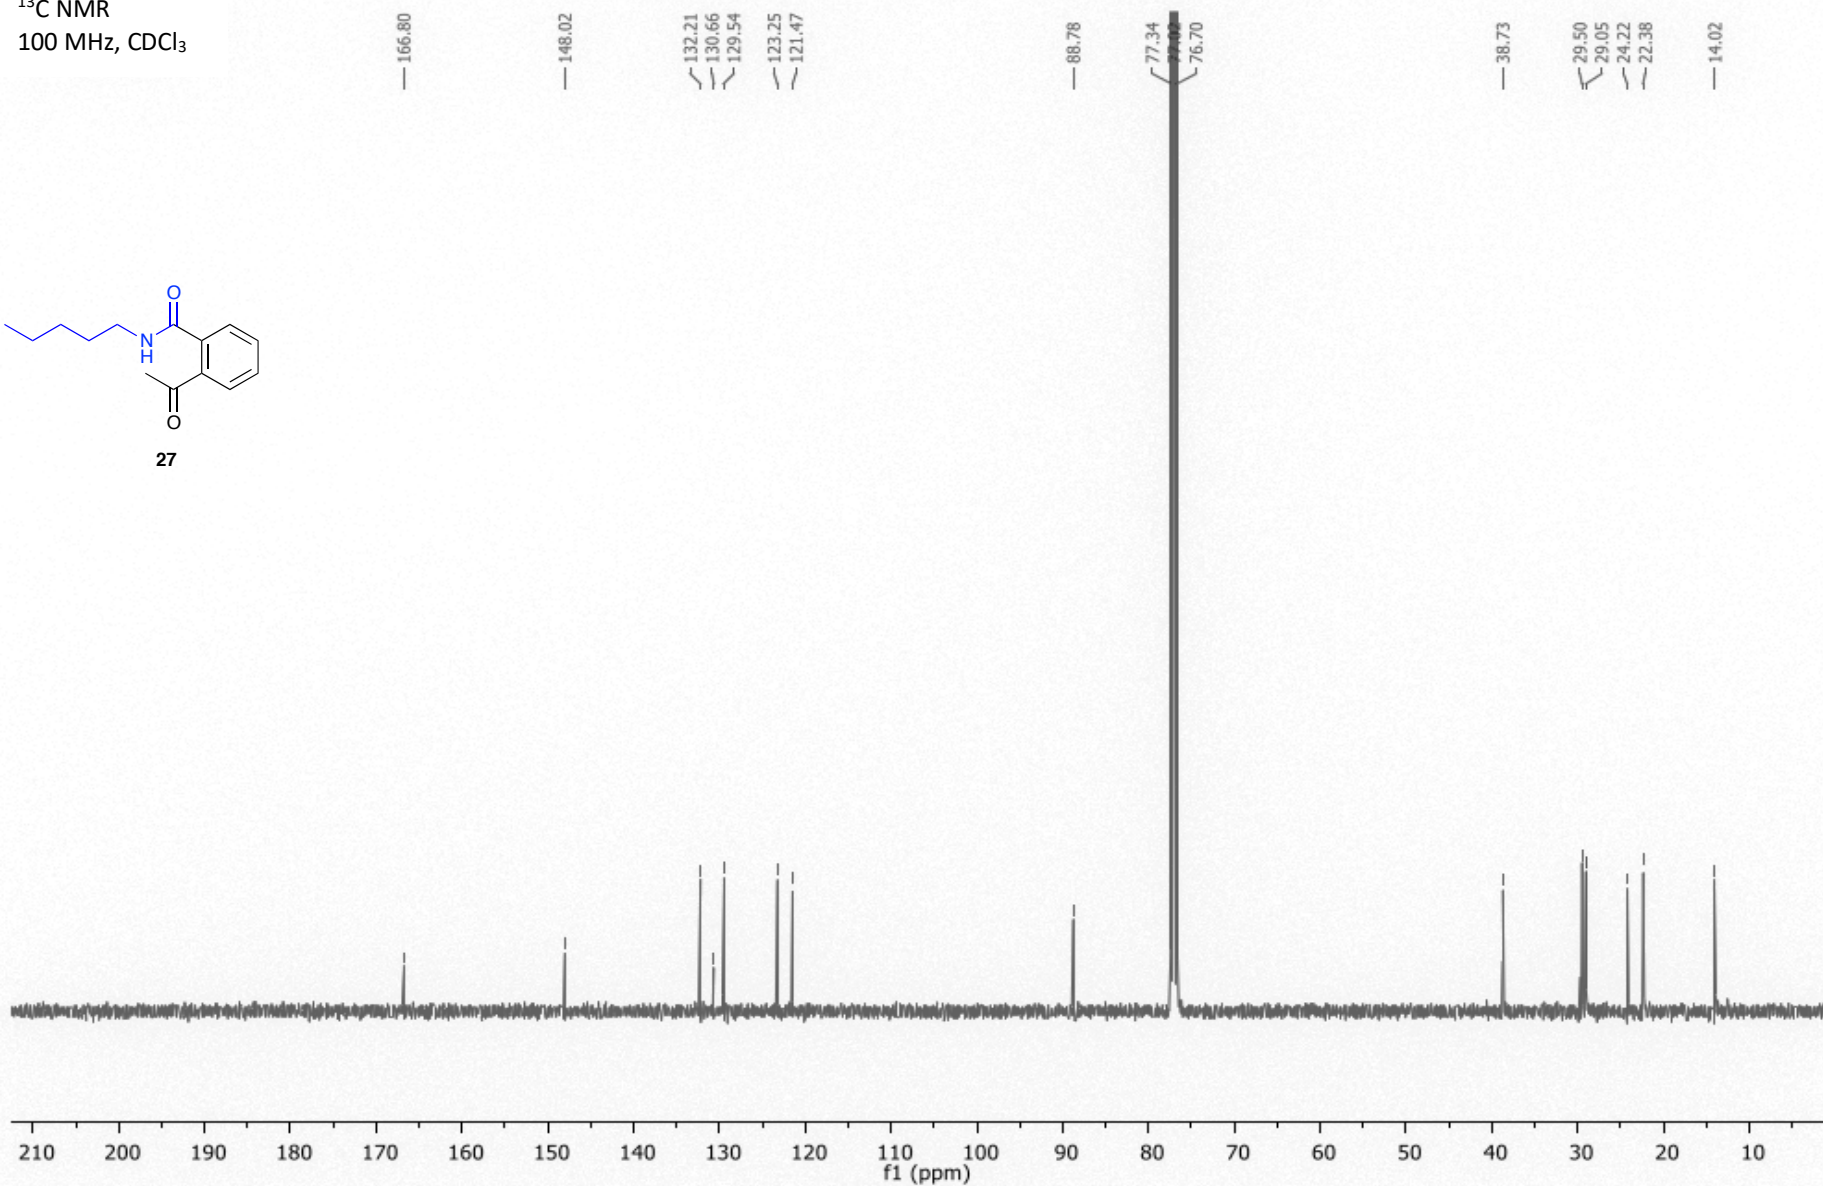

$^1\text{H}$  NMR  
400 MHz,  $\text{CDCl}_3$

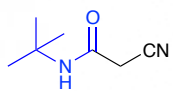

29

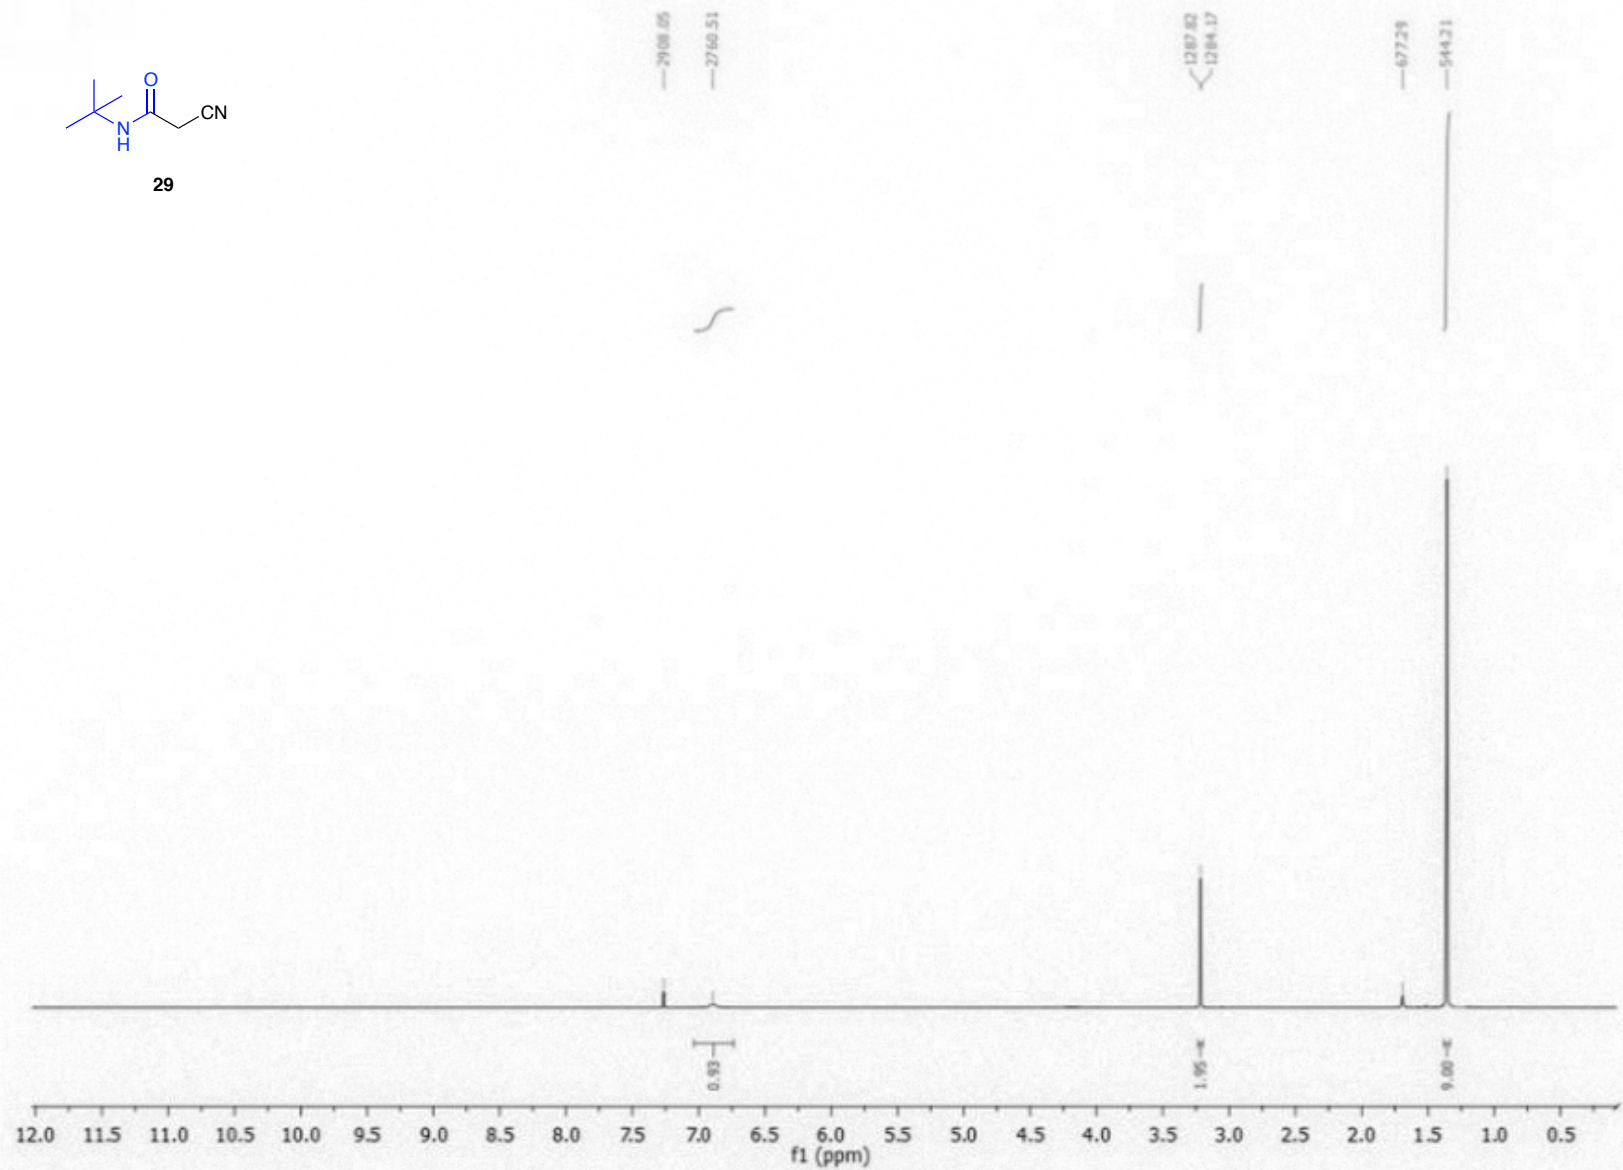

<sup>13</sup>C NMR  
100 MHz, CDCl<sub>3</sub>

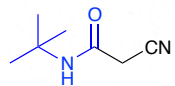

29

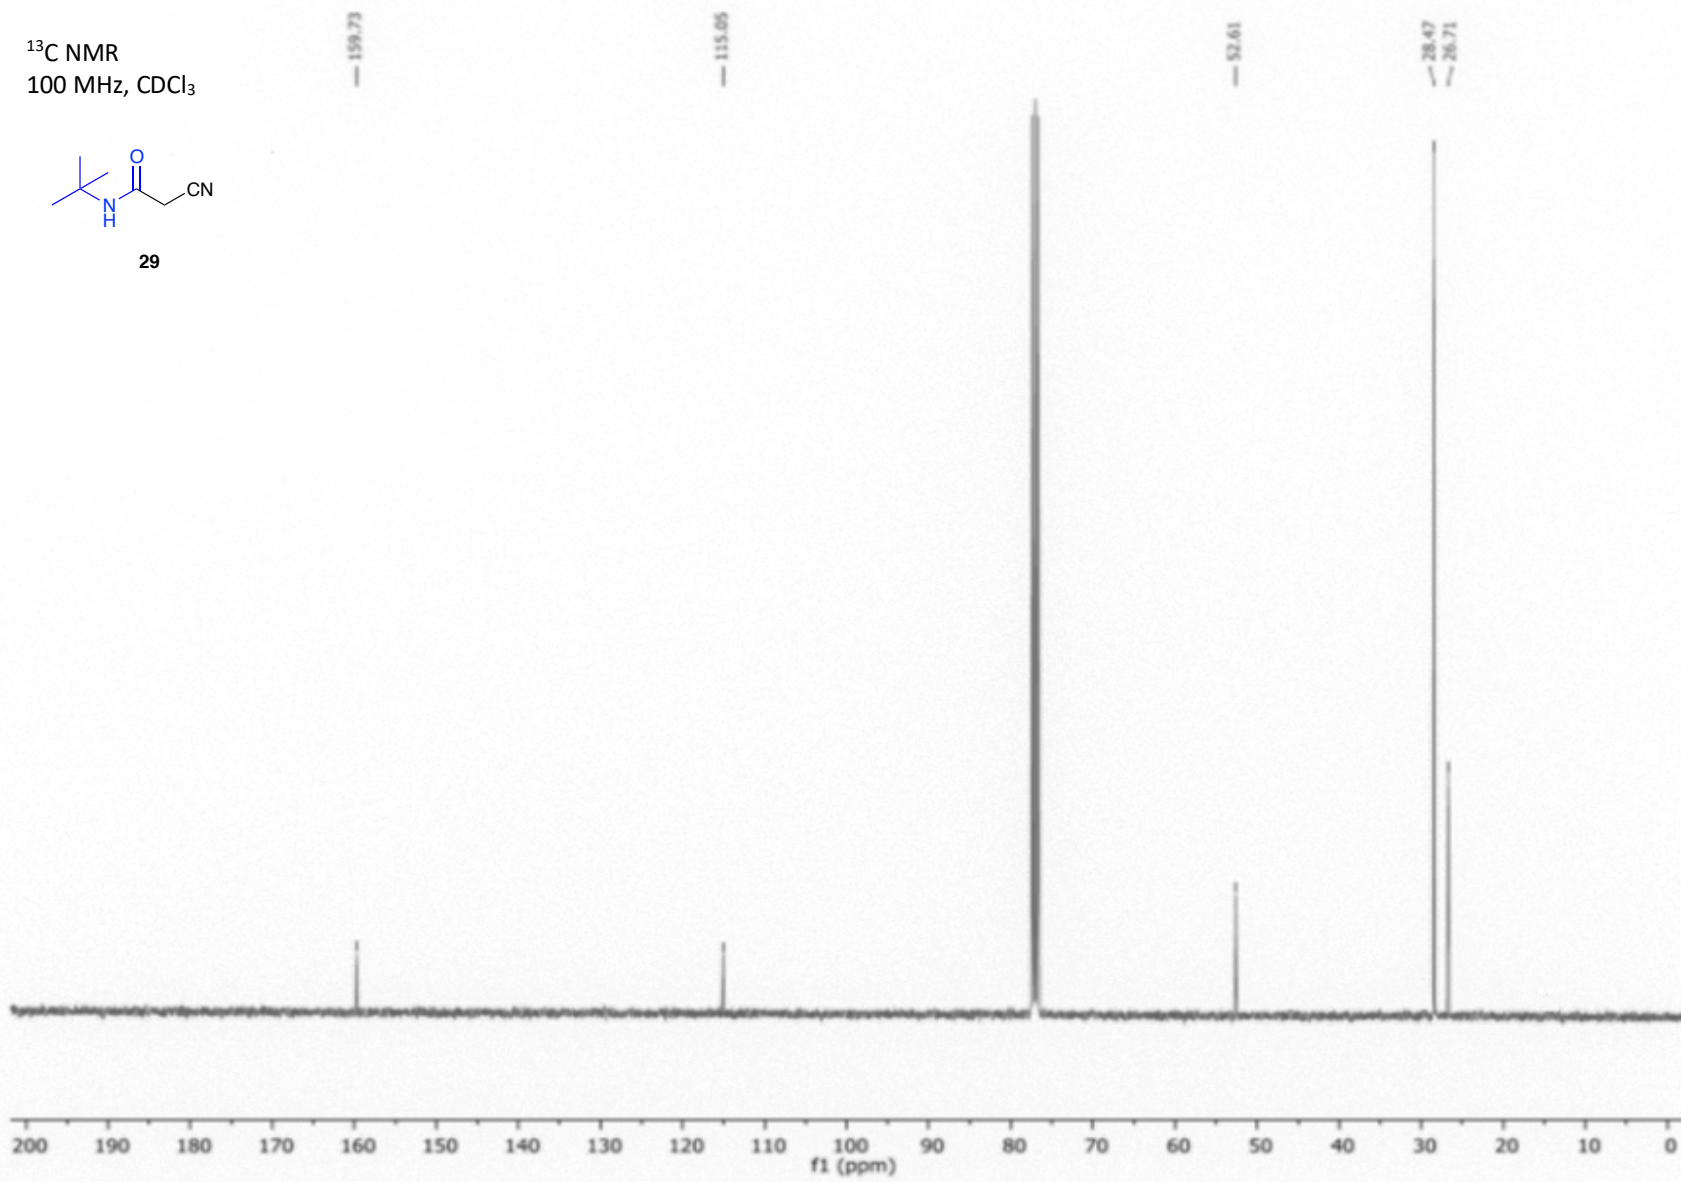



<sup>1</sup>H NMR  
400 MHz, DMSO-d<sub>6</sub>

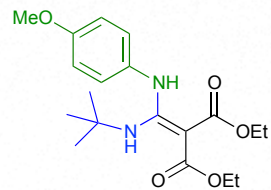

30

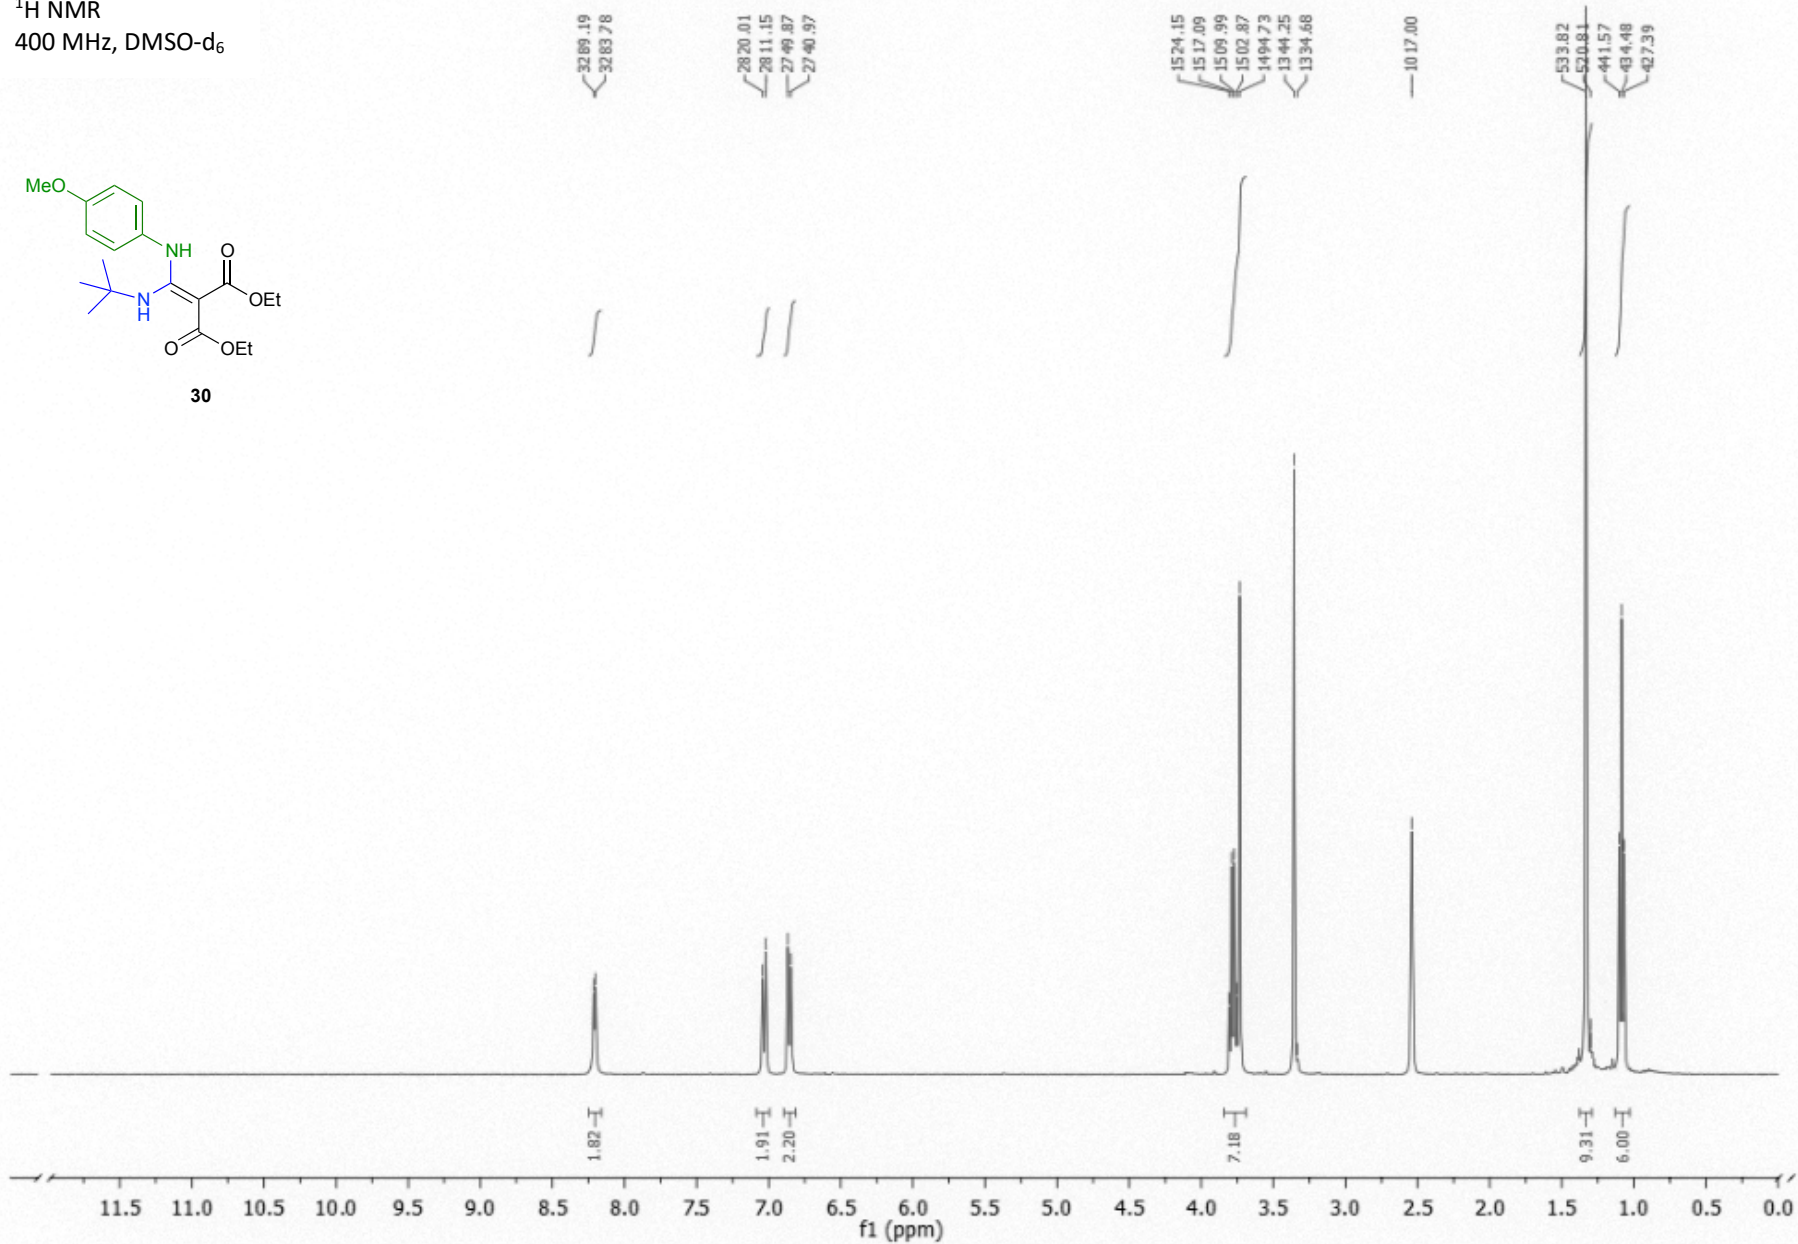

<sup>13</sup>C NMR  
100 MHz, DMSO-d<sub>6</sub>

— 168.32 — 162.82 — 155.99 — 134.18 — 123.86 — 114.22 — 80.88 — 58.64 — 55.69 — 54.29 — 40.62 — 40.41 — 40.20 — 39.99 — 39.79 — 39.58 — 39.37 — 30.41 — 14.80

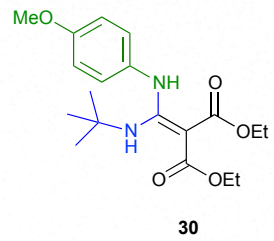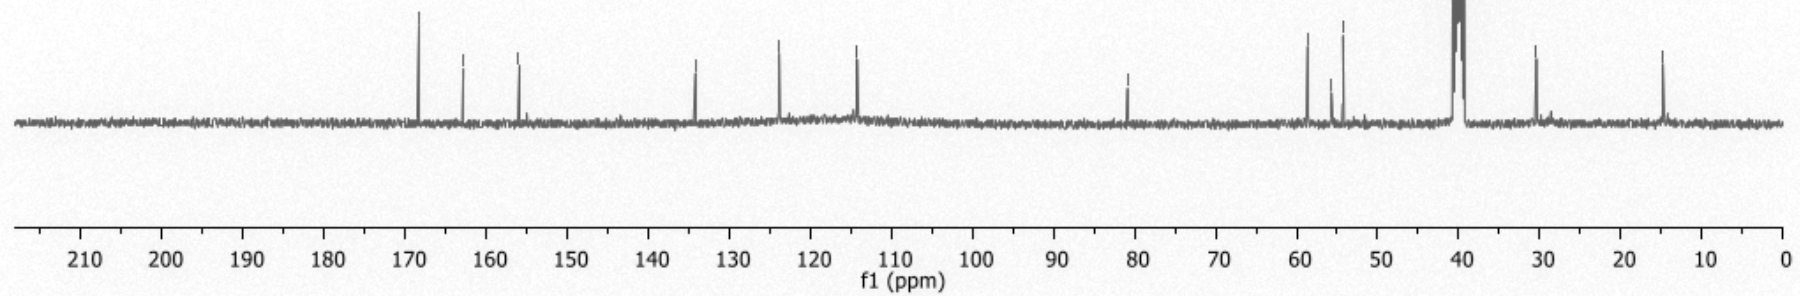

<sup>1</sup>H NMR  
400 MHz, DMSO-d<sub>6</sub>

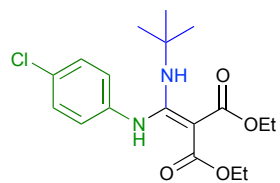

31

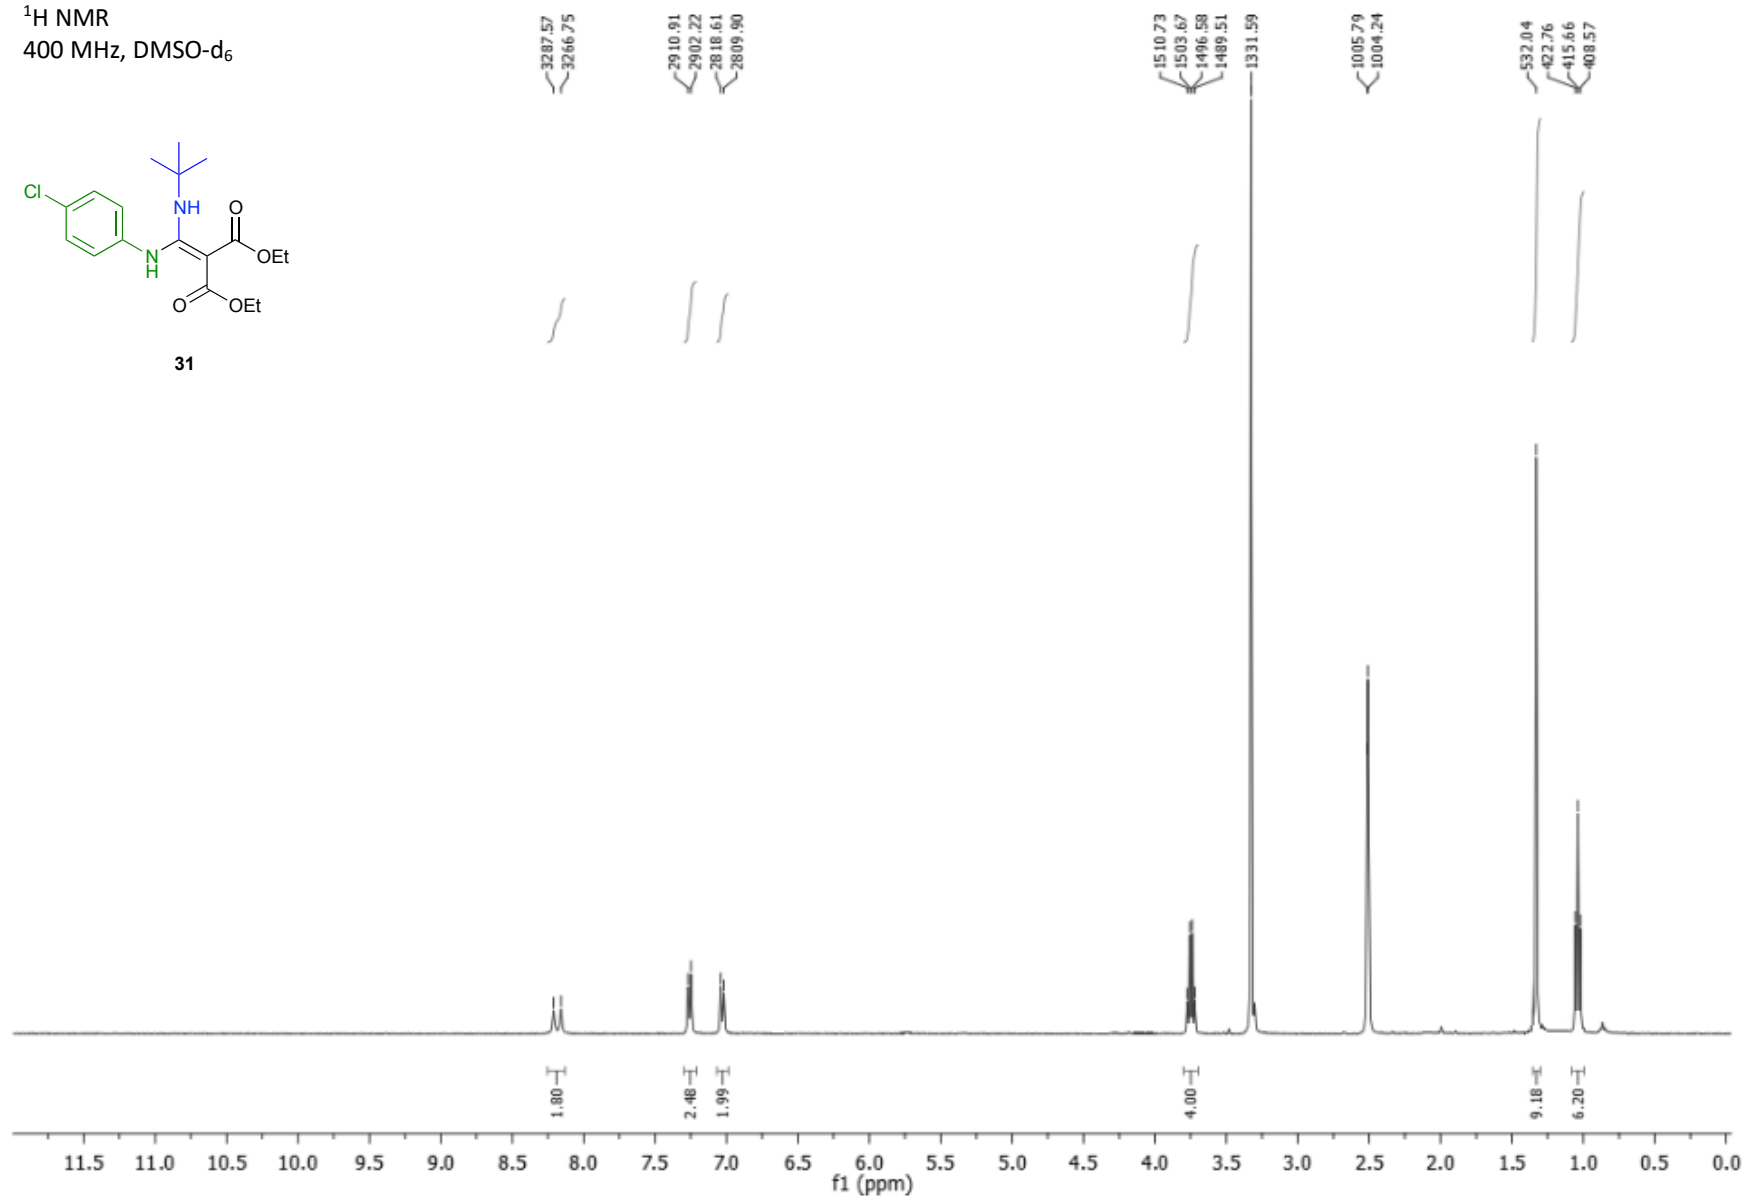

<sup>13</sup>C NMR  
100 MHz, DMSO-d<sub>6</sub>

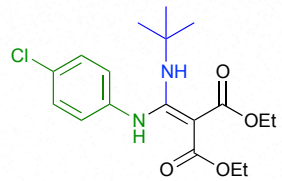

31

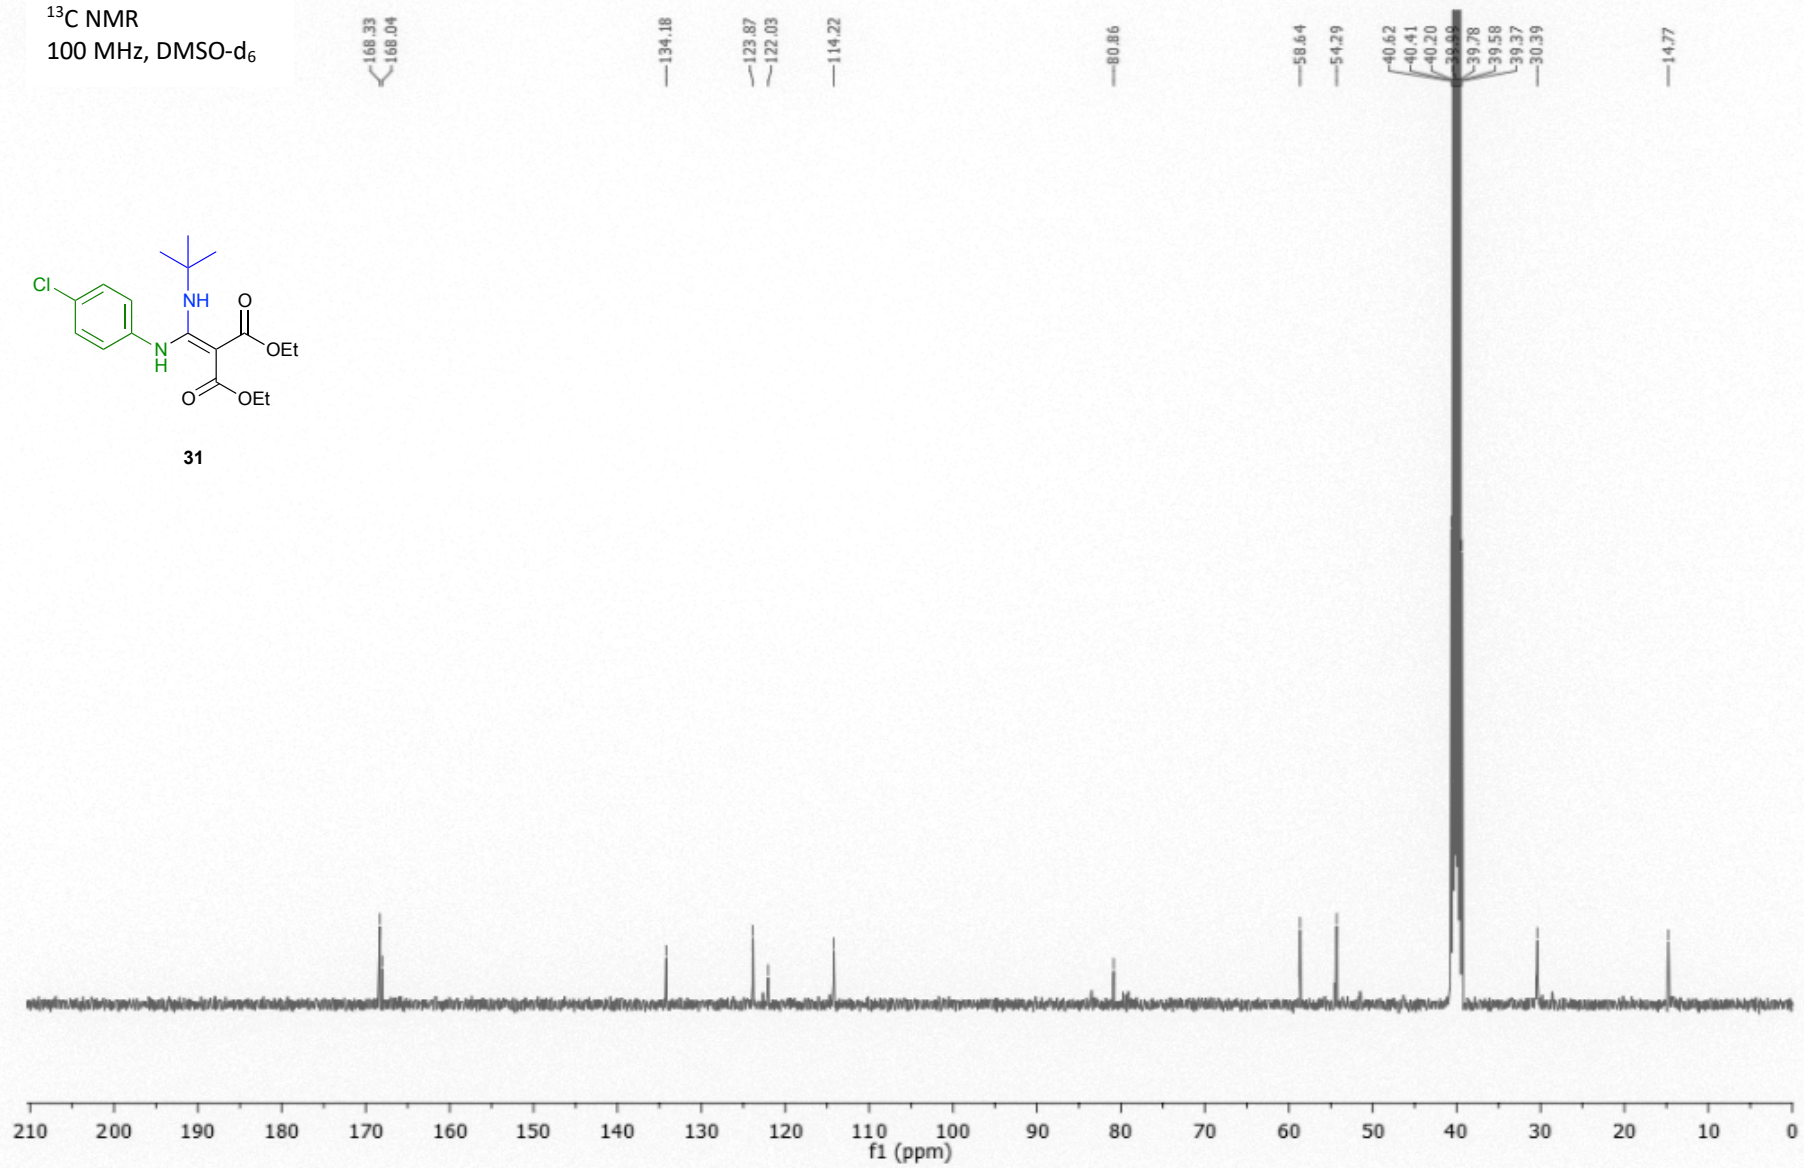



<sup>1</sup>H NMR  
400 MHz, CDCl<sub>3</sub>

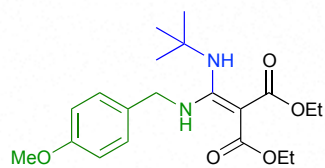

32

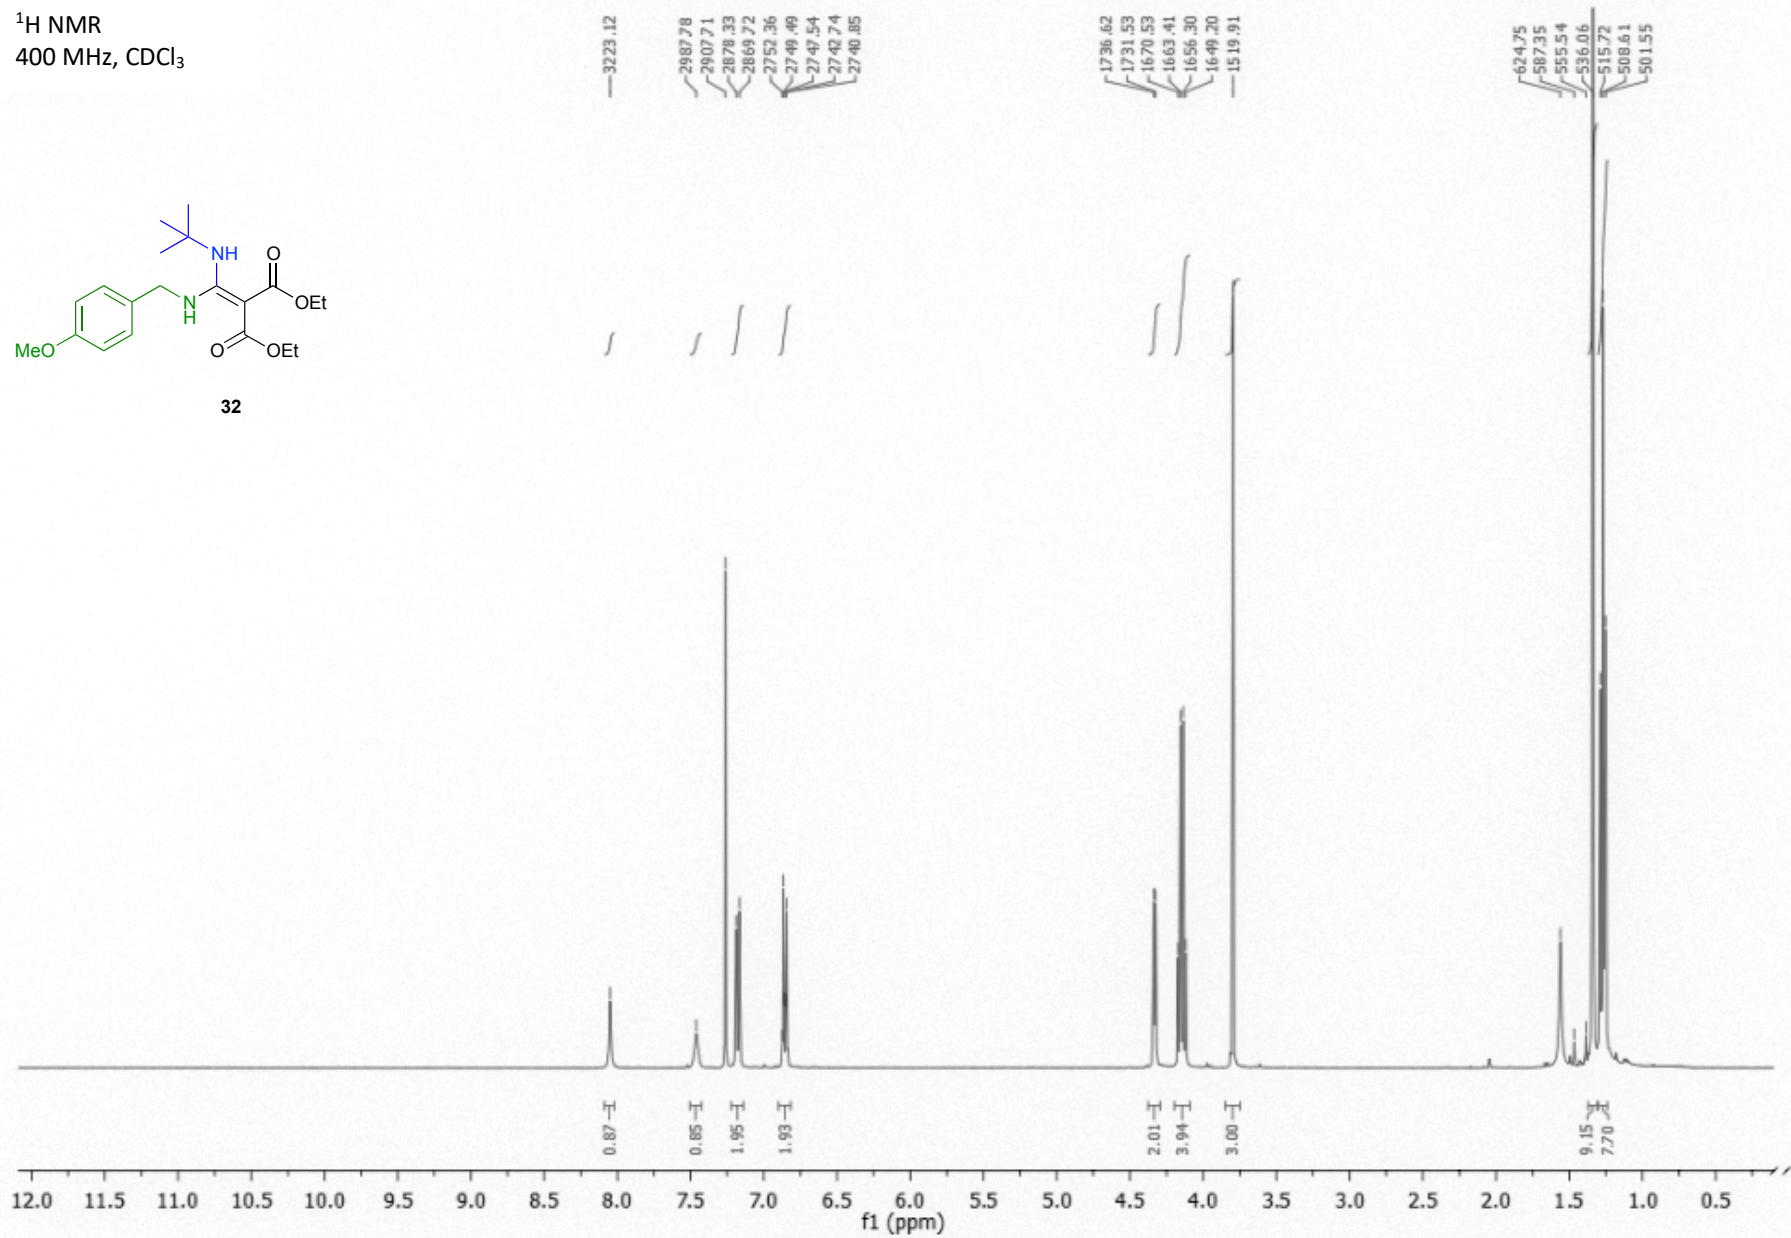

<sup>13</sup>C NMR  
100 MHz, CDCl<sub>3</sub>

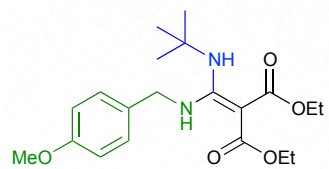

32

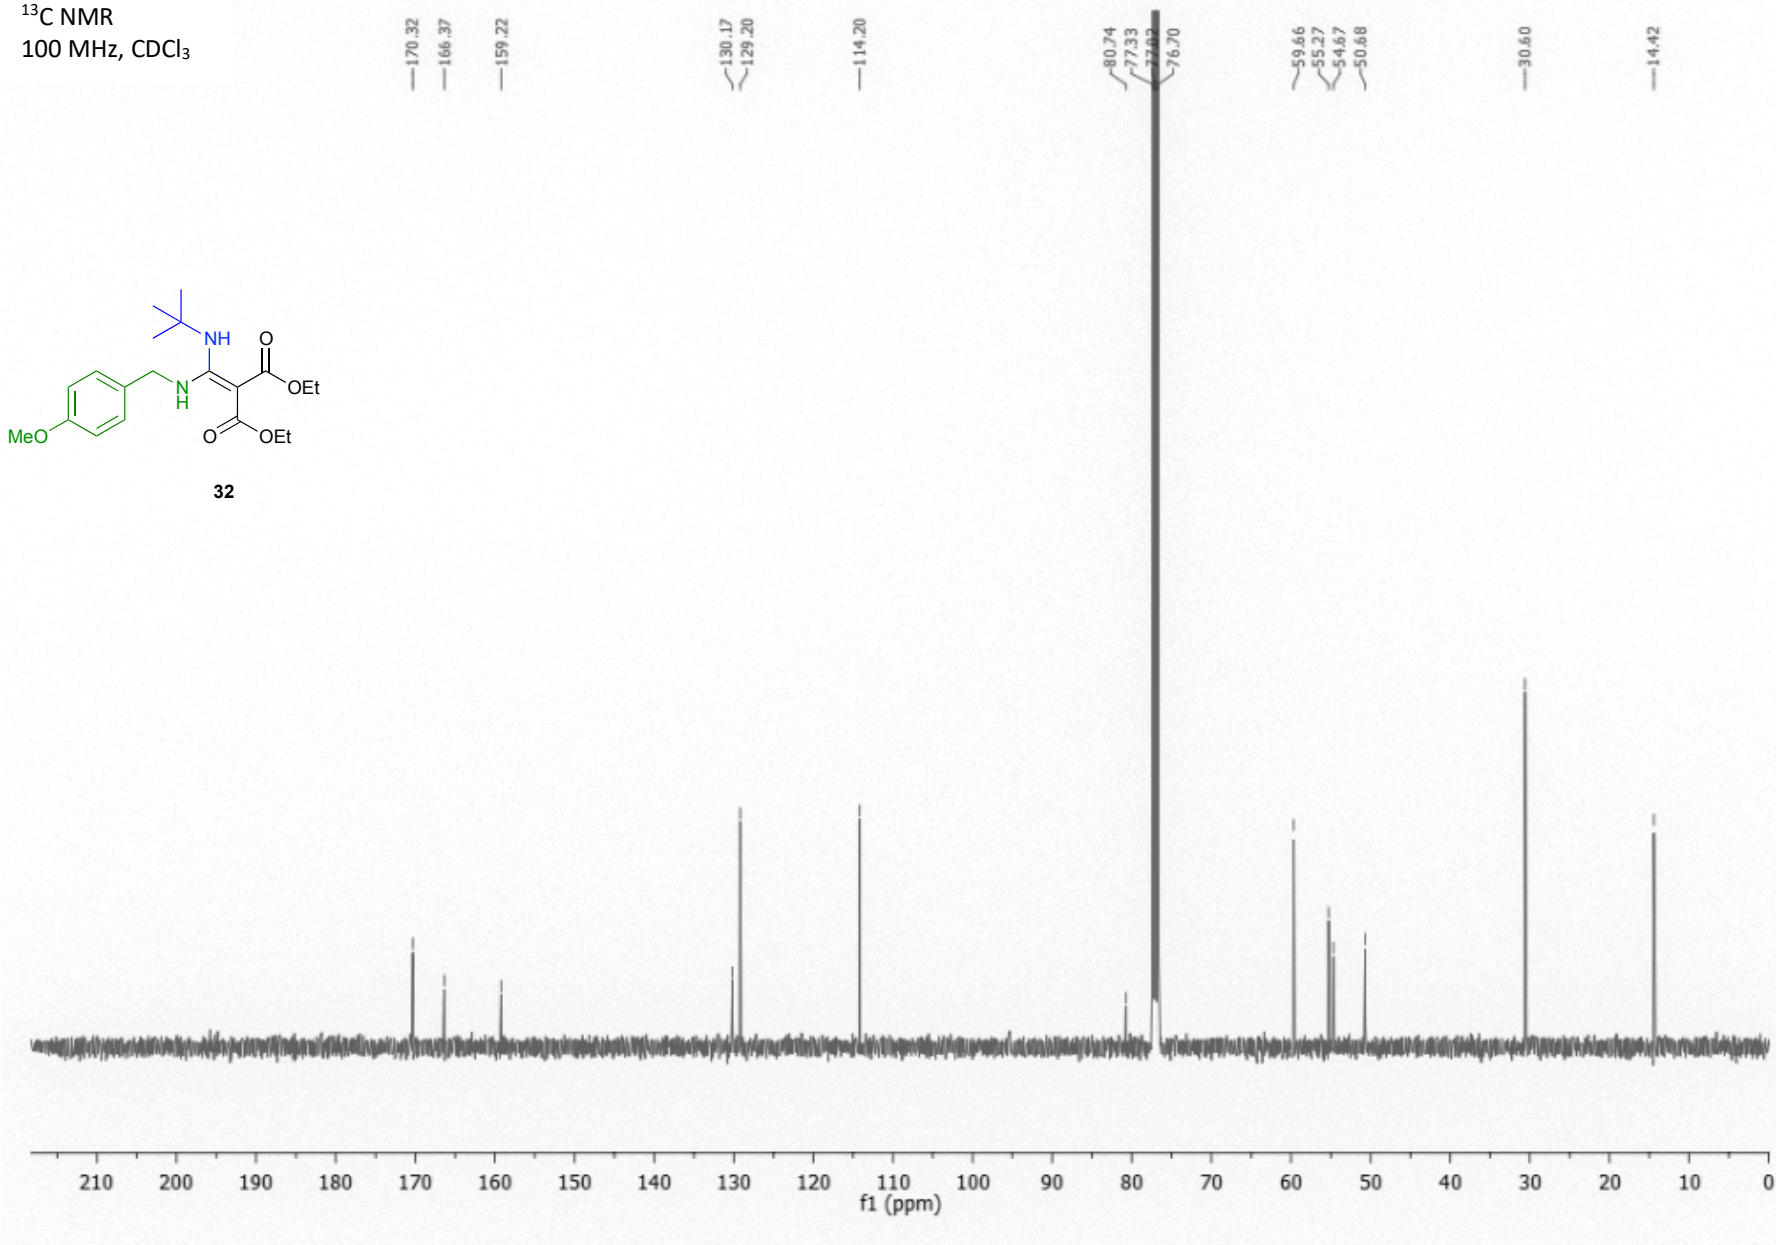

<sup>1</sup>H NMR  
400 MHz, CDCl<sub>3</sub>

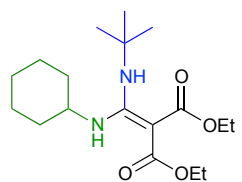

33

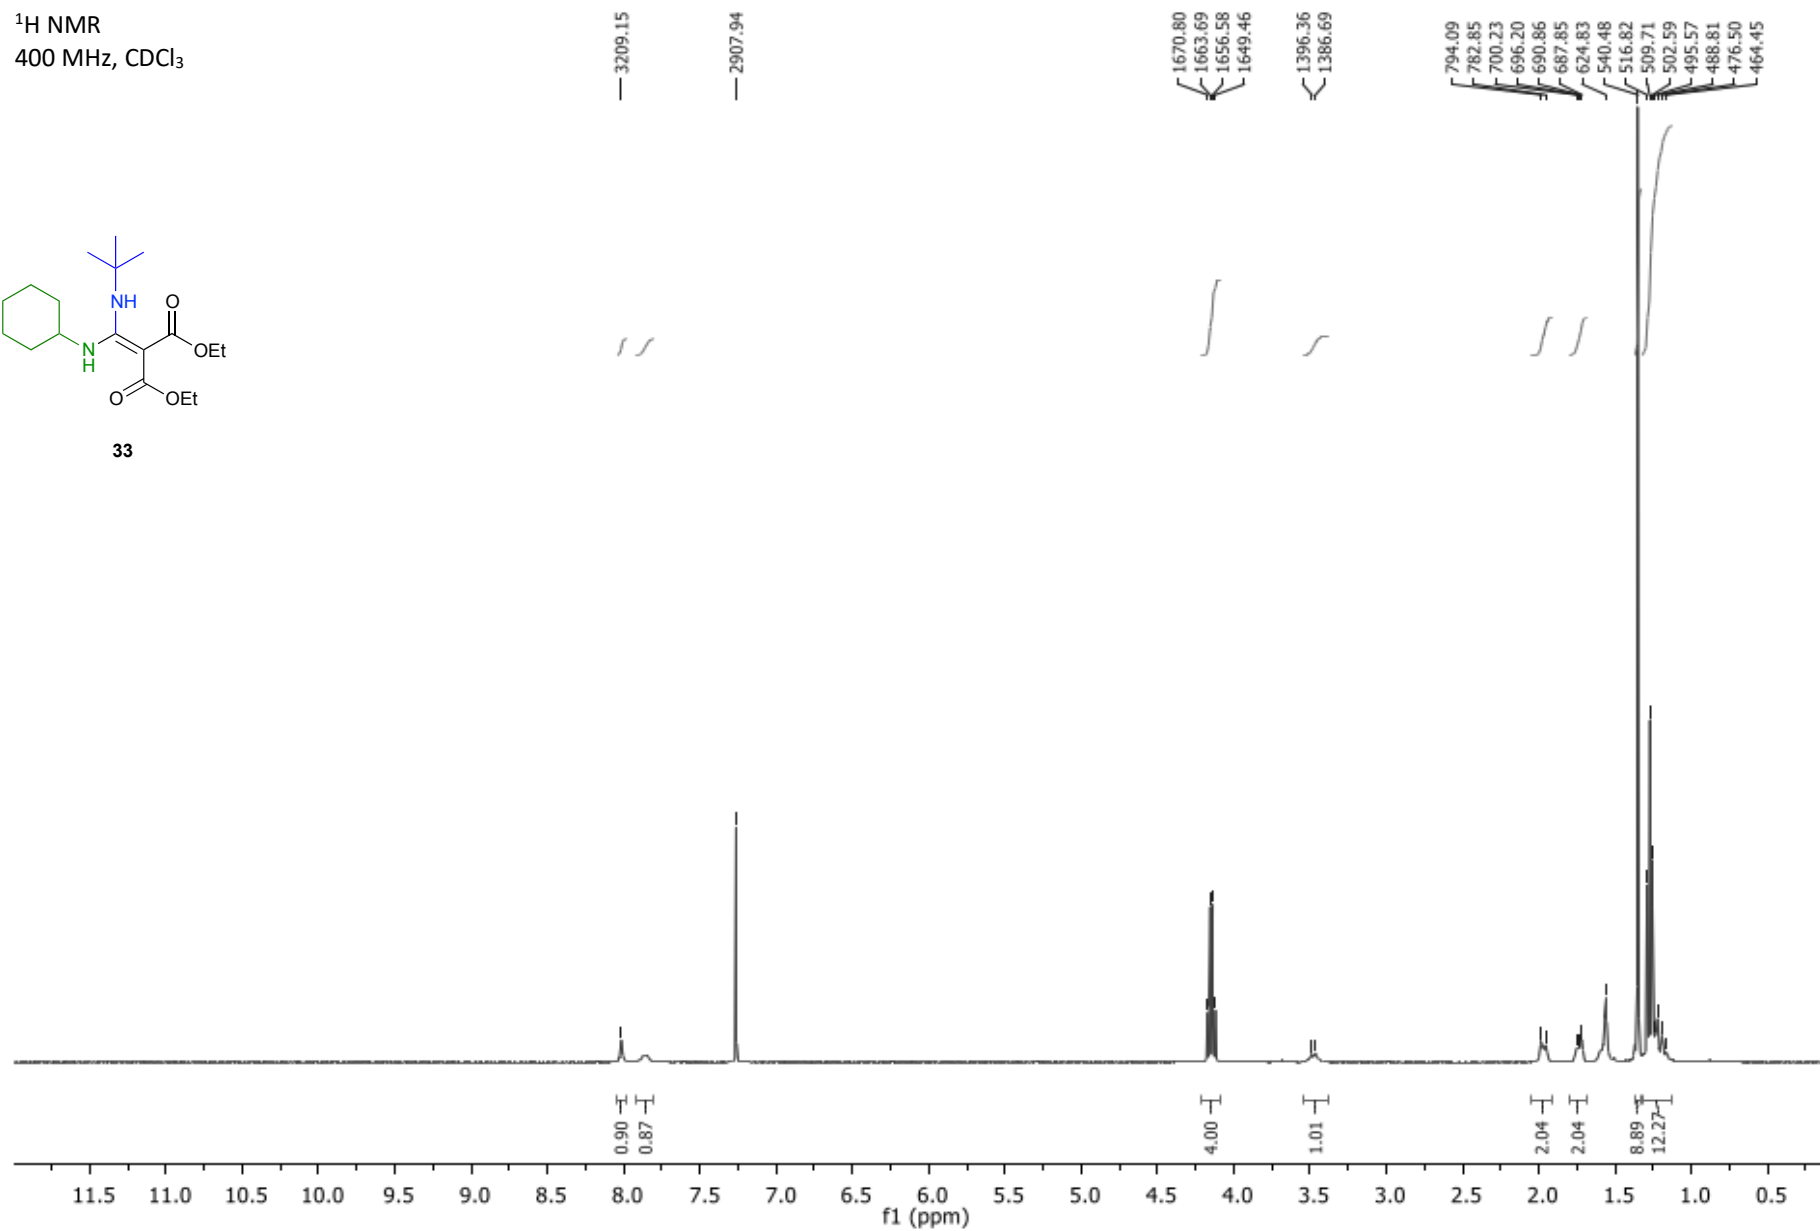

<sup>13</sup>C NMR  
100 MHz, CDCl<sub>3</sub>

170.87  
166.04

81.63  
77.33  
77.02  
76.70

59.58  
55.48  
54.80

33.28  
30.44  
25.47  
25.01

14.40

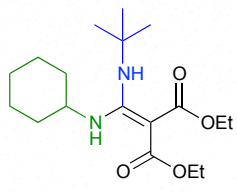

33

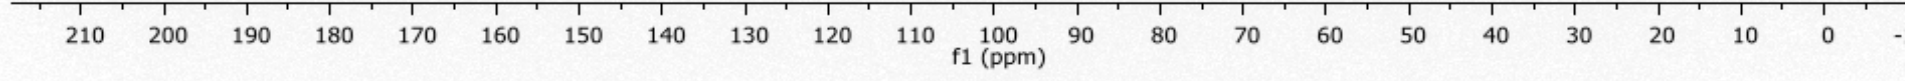



<sup>1</sup>H NMR  
400 MHz, CDCl<sub>3</sub>

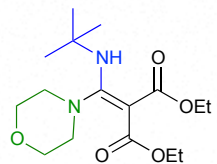

34

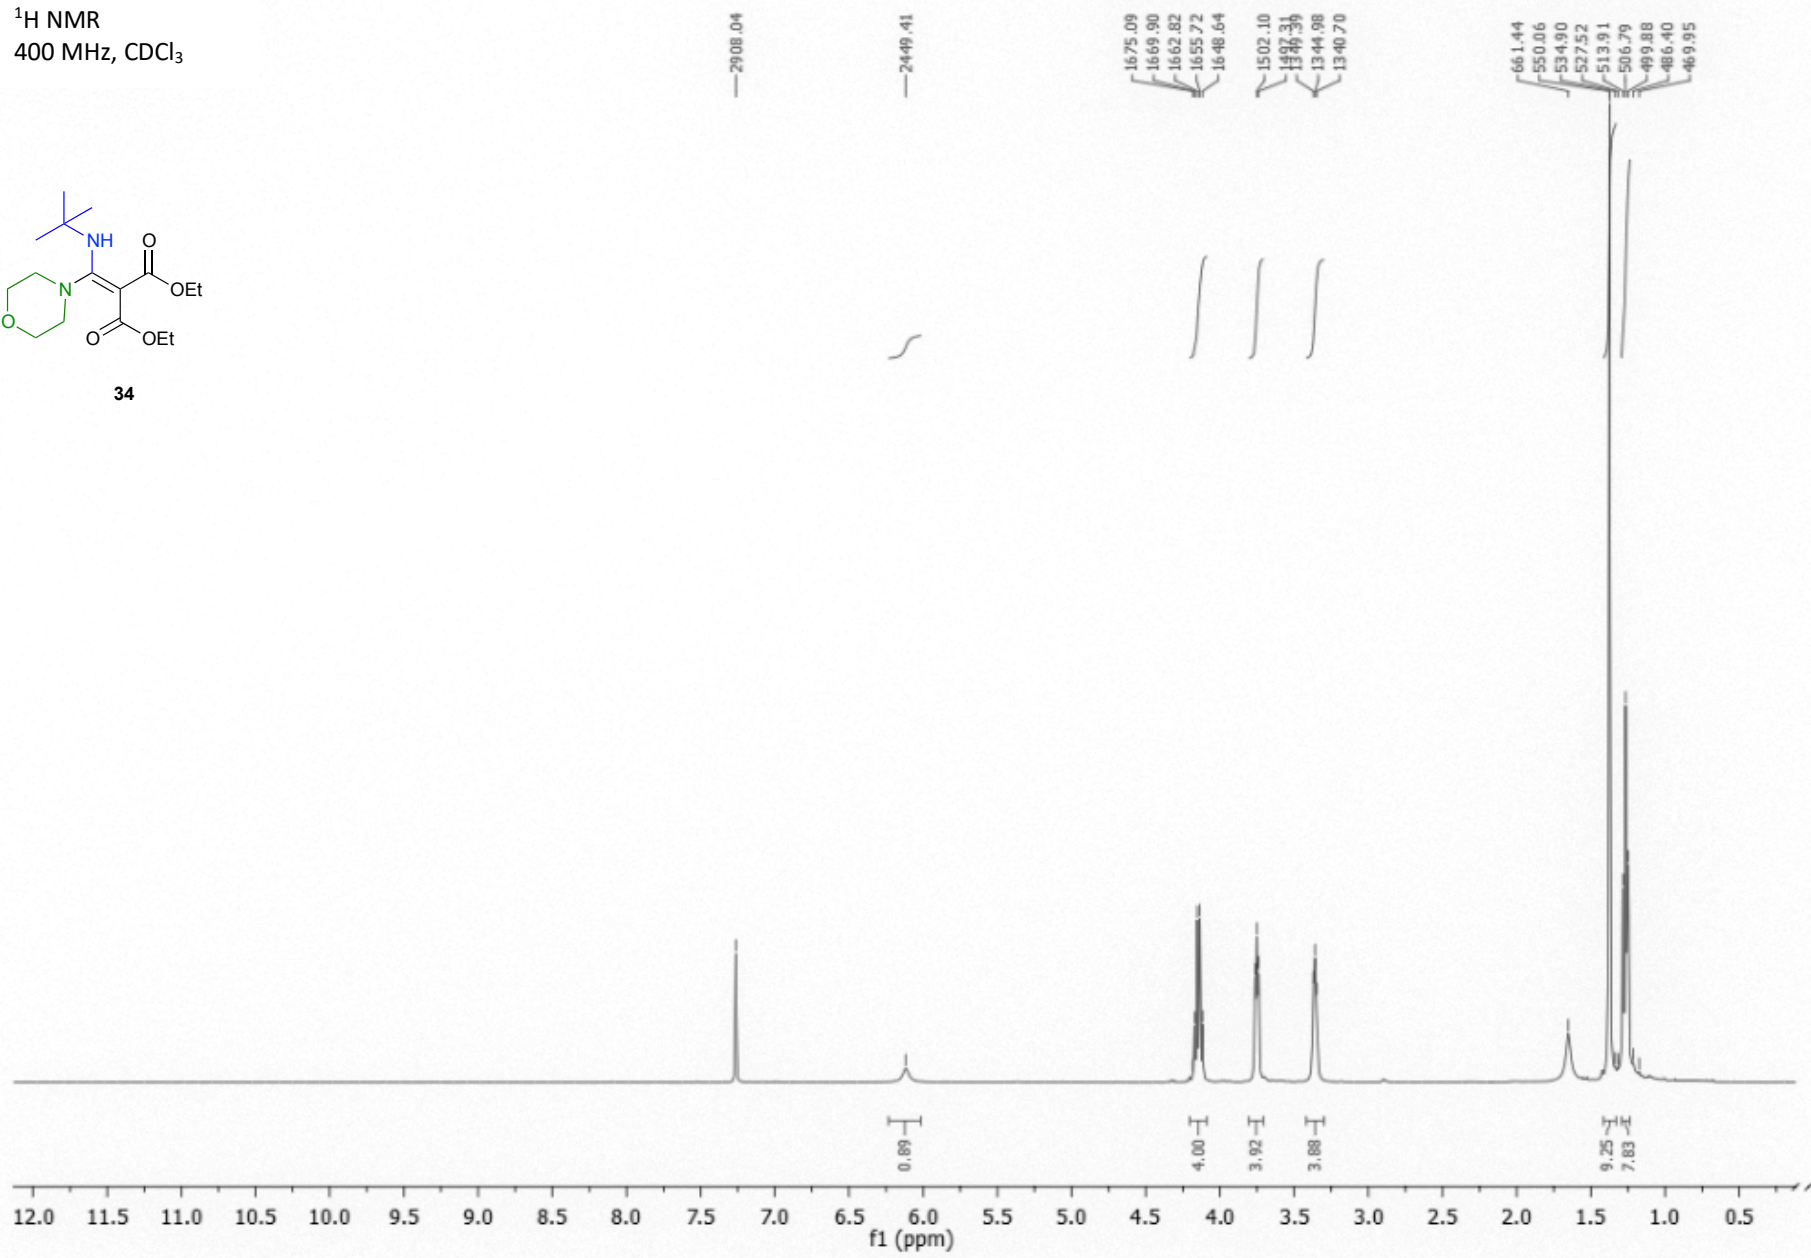

<sup>13</sup>C NMR  
100 MHz, CDCl<sub>3</sub>

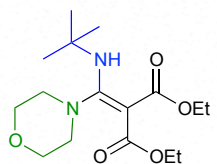

34

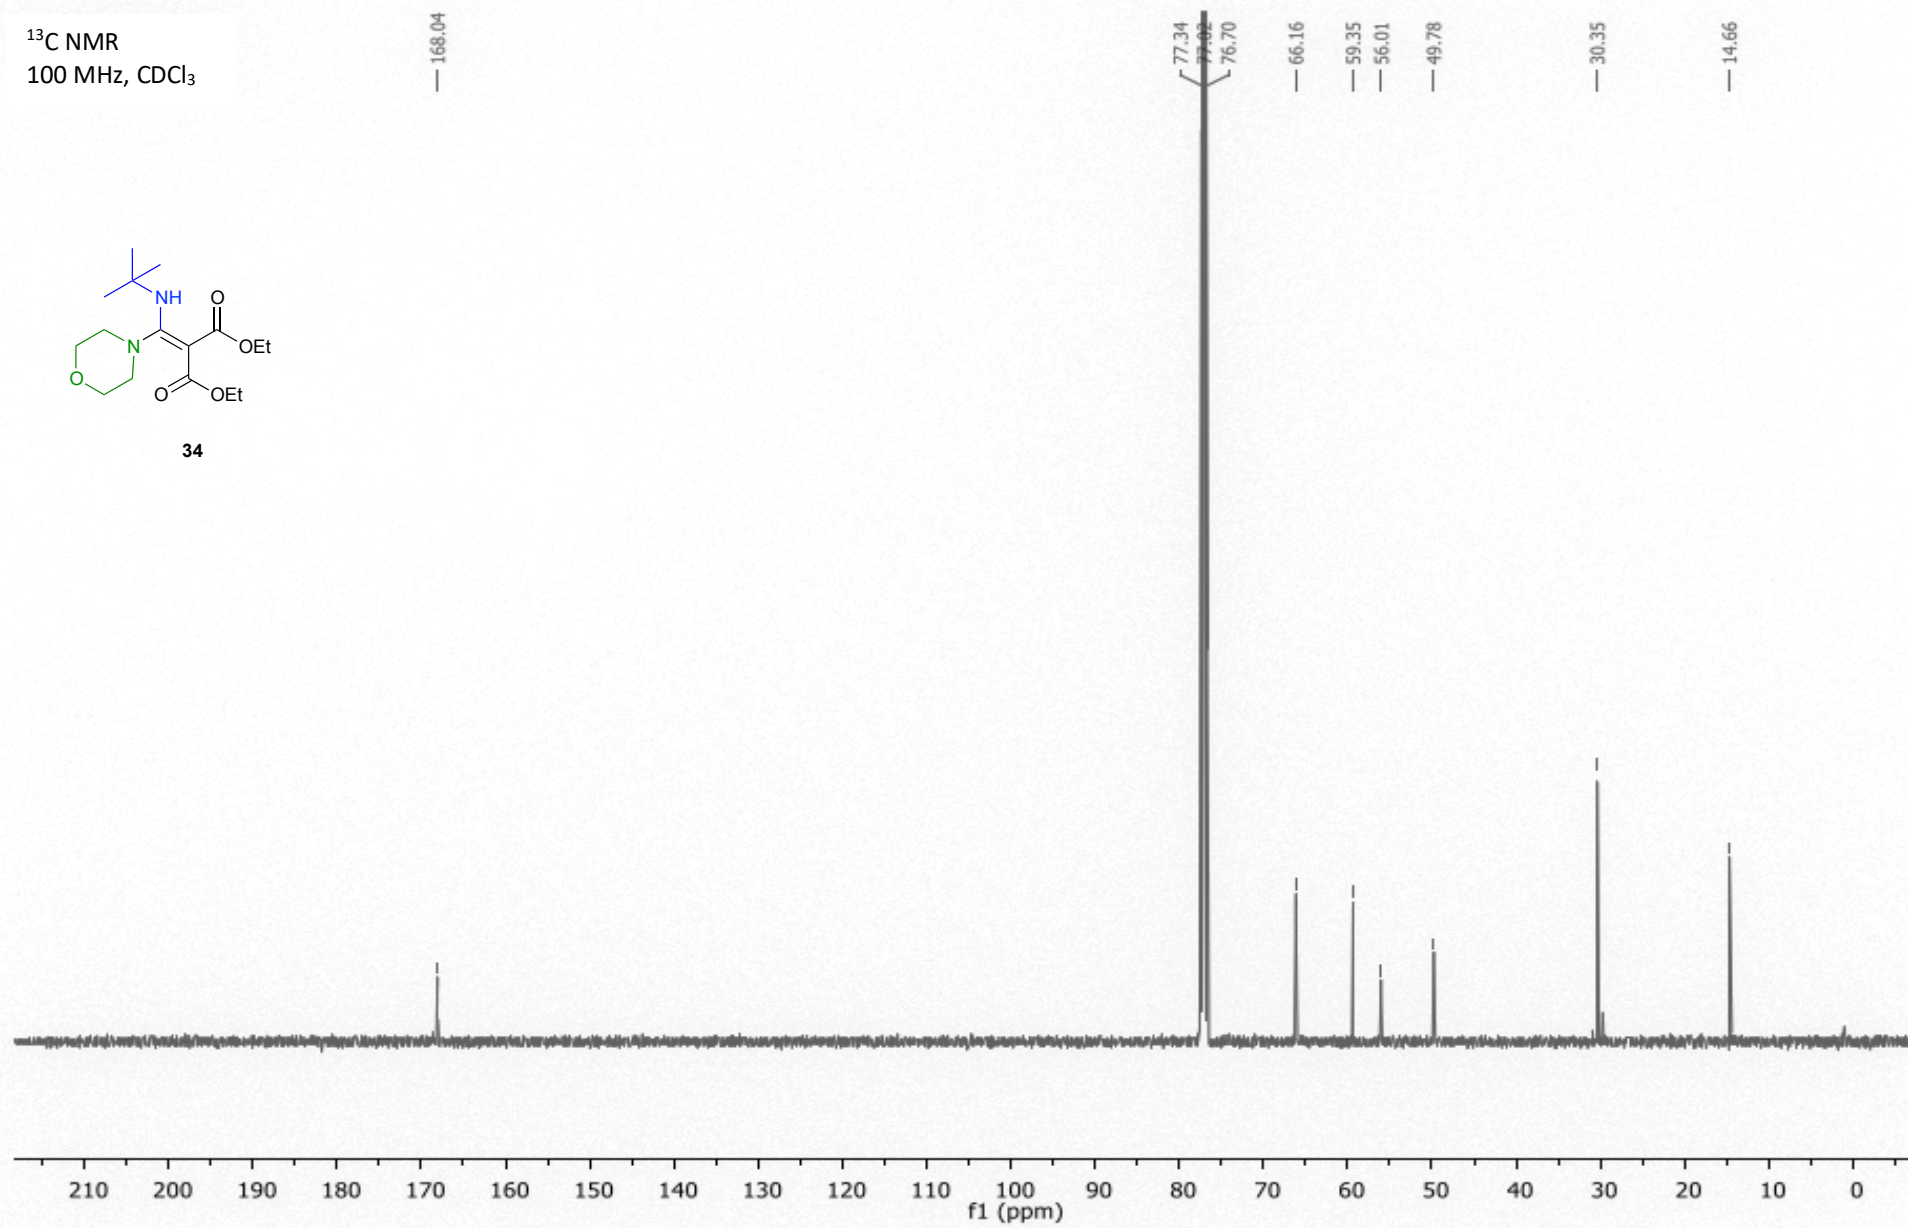

<sup>1</sup>H NMR  
400 MHz, CDCl<sub>3</sub>

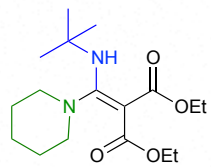

**35**

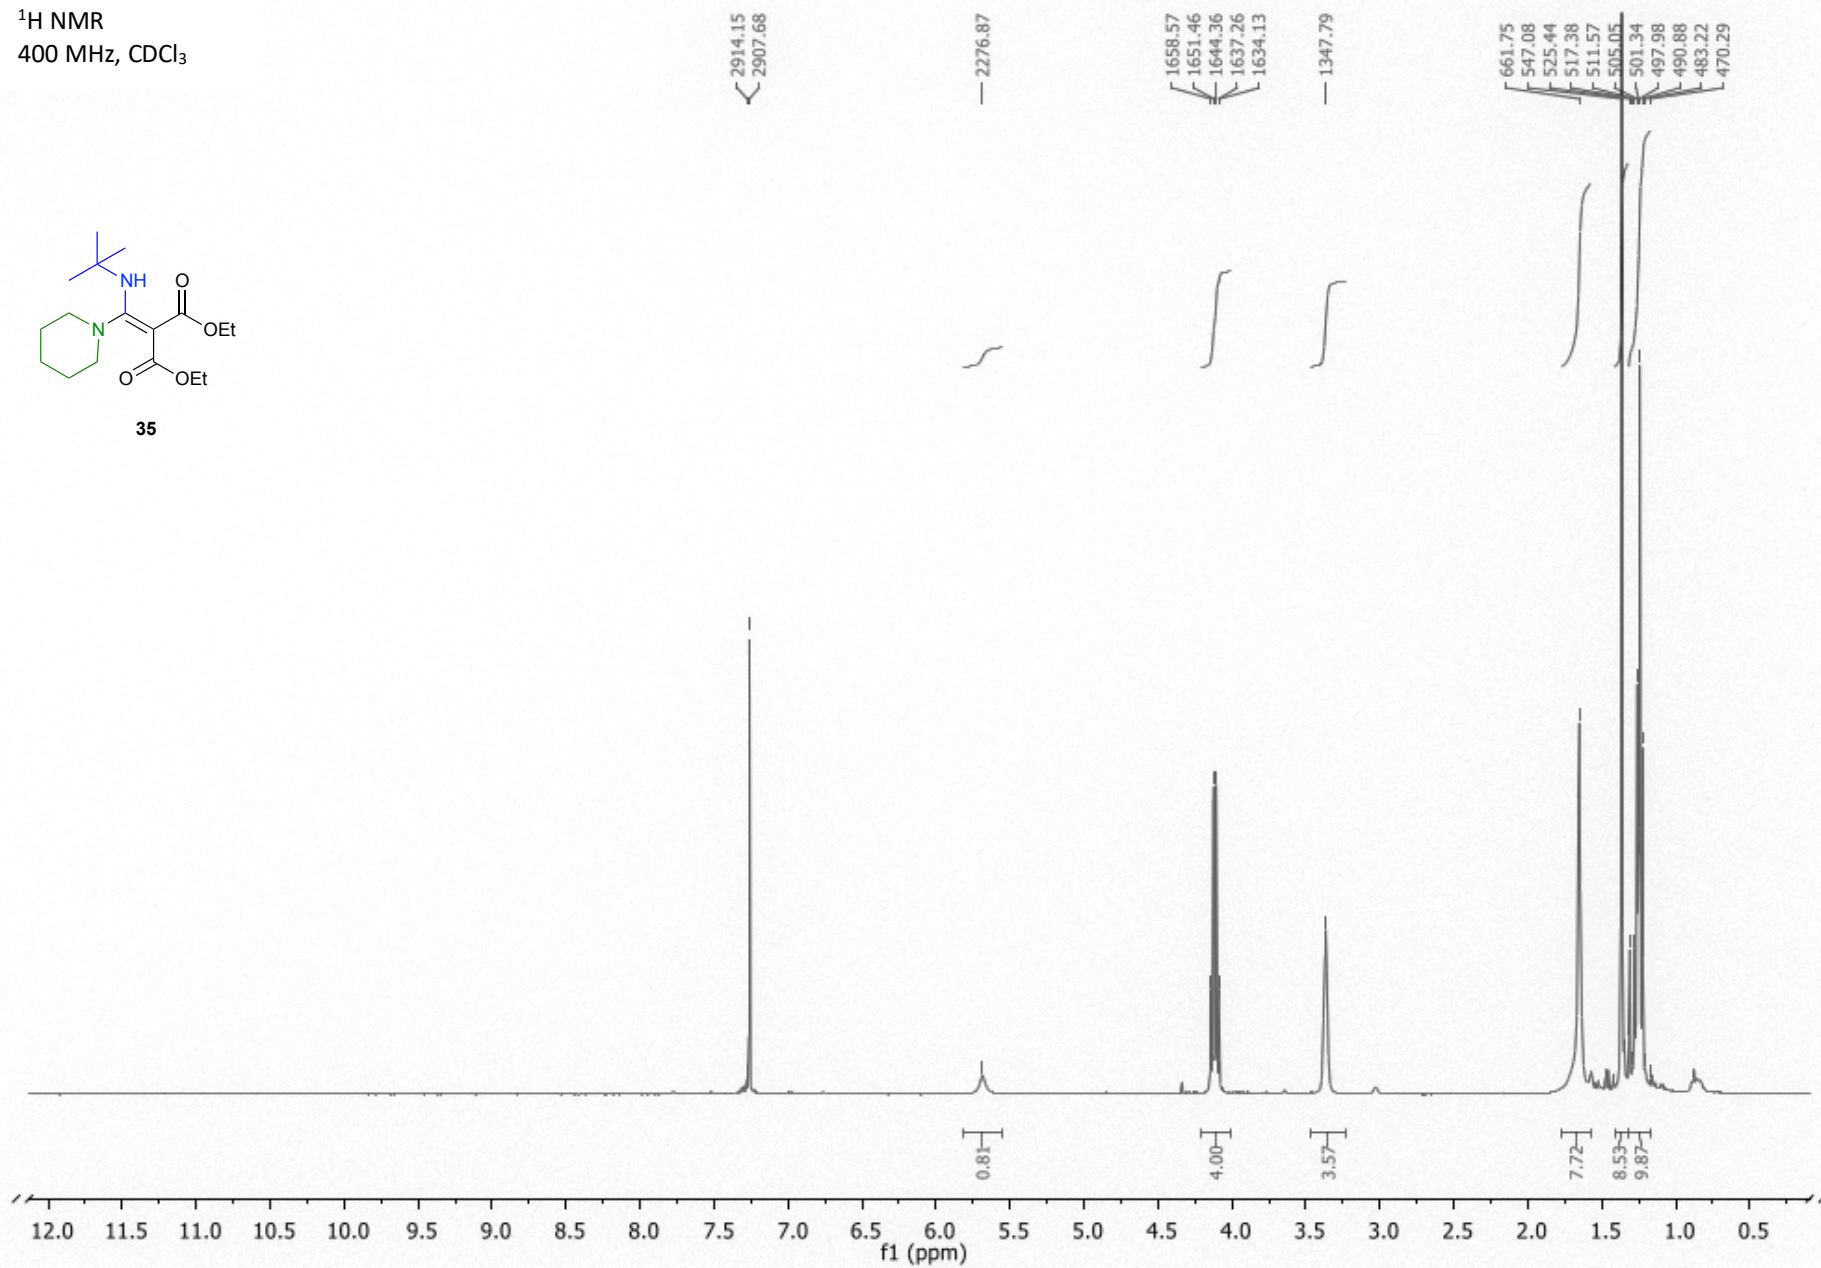



<sup>13</sup>C NMR  
100 MHz, CDCl<sub>3</sub>

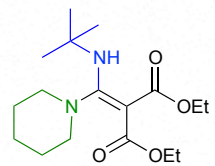

35

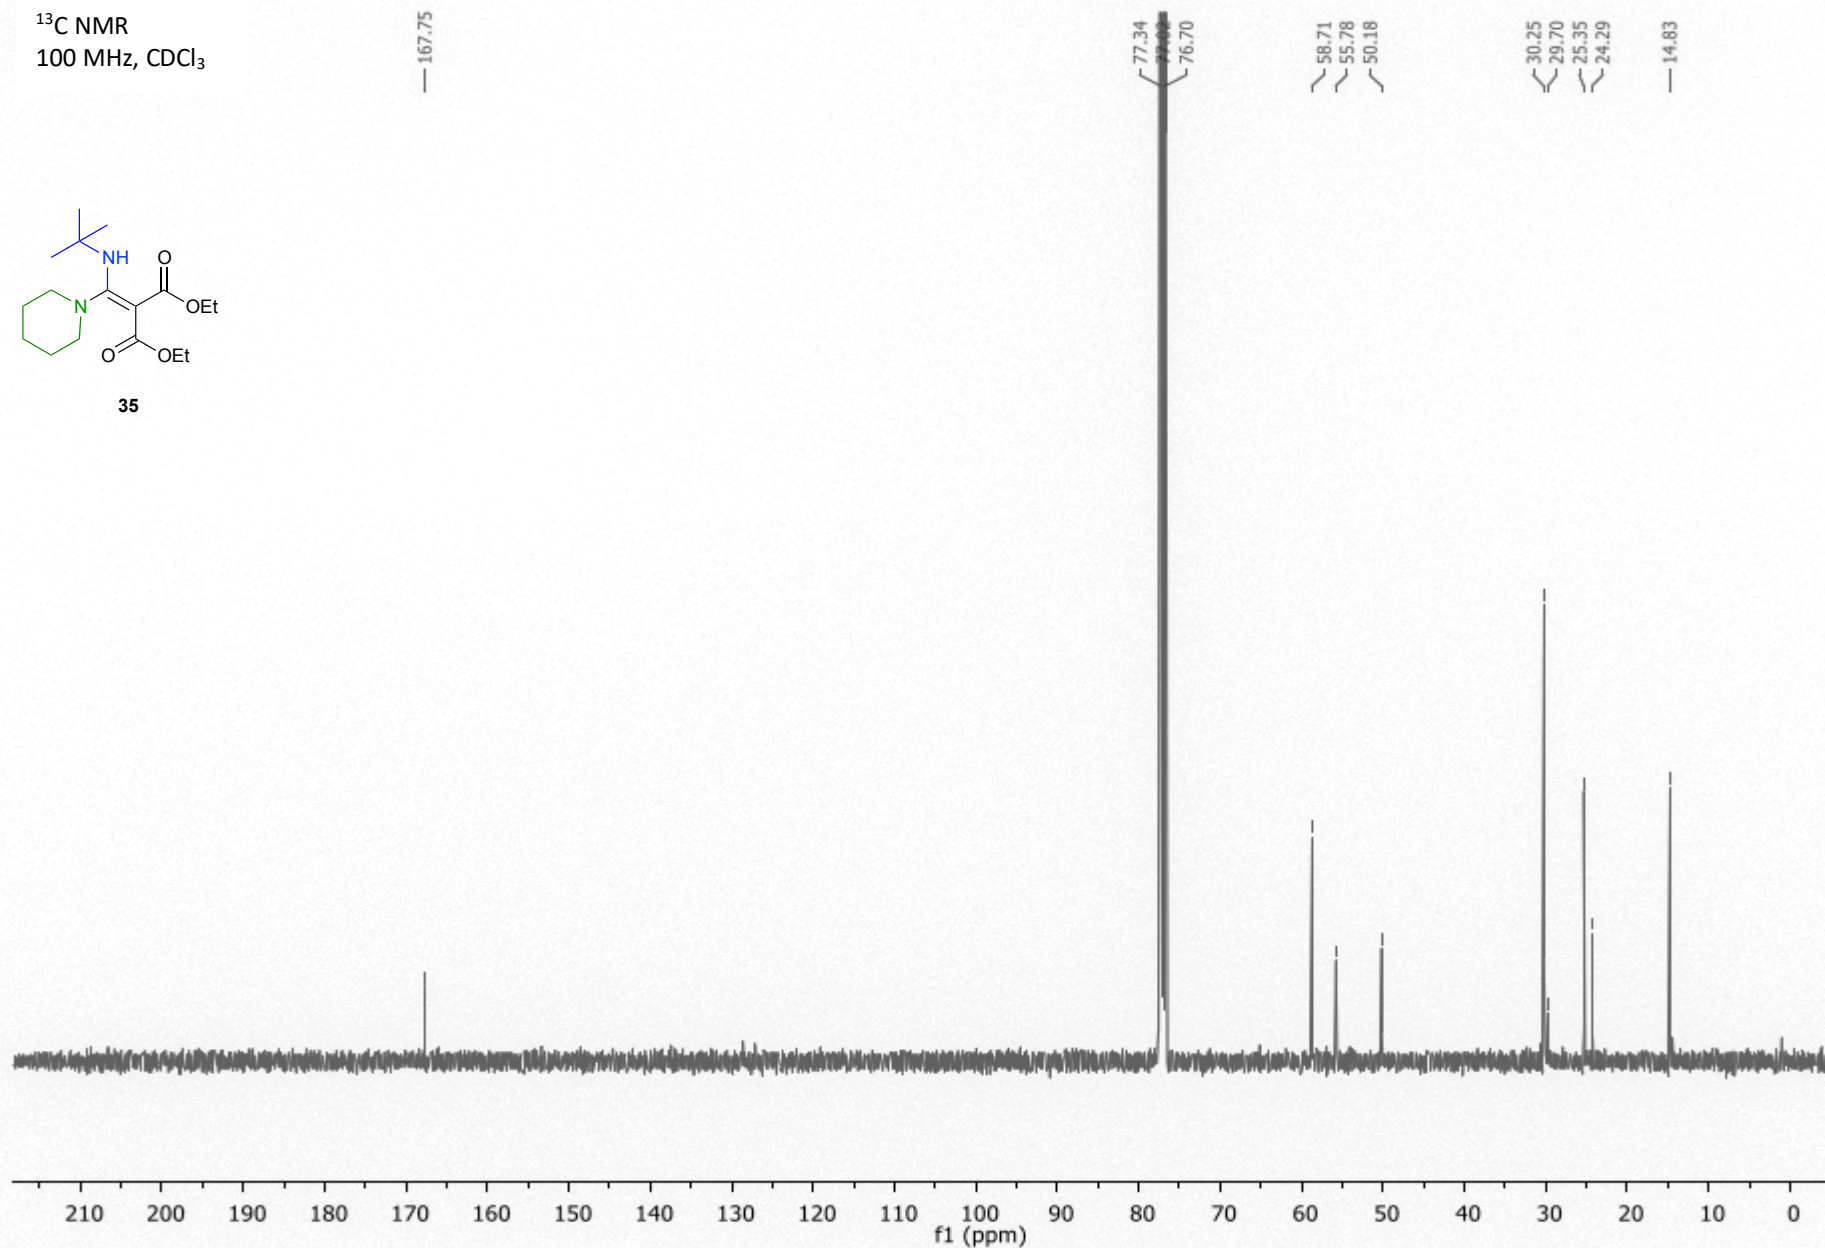



<sup>1</sup>H NMR  
400 MHz, CDCl<sub>3</sub>

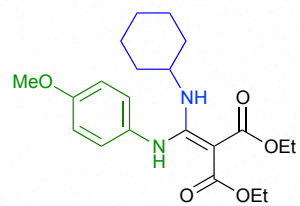

37

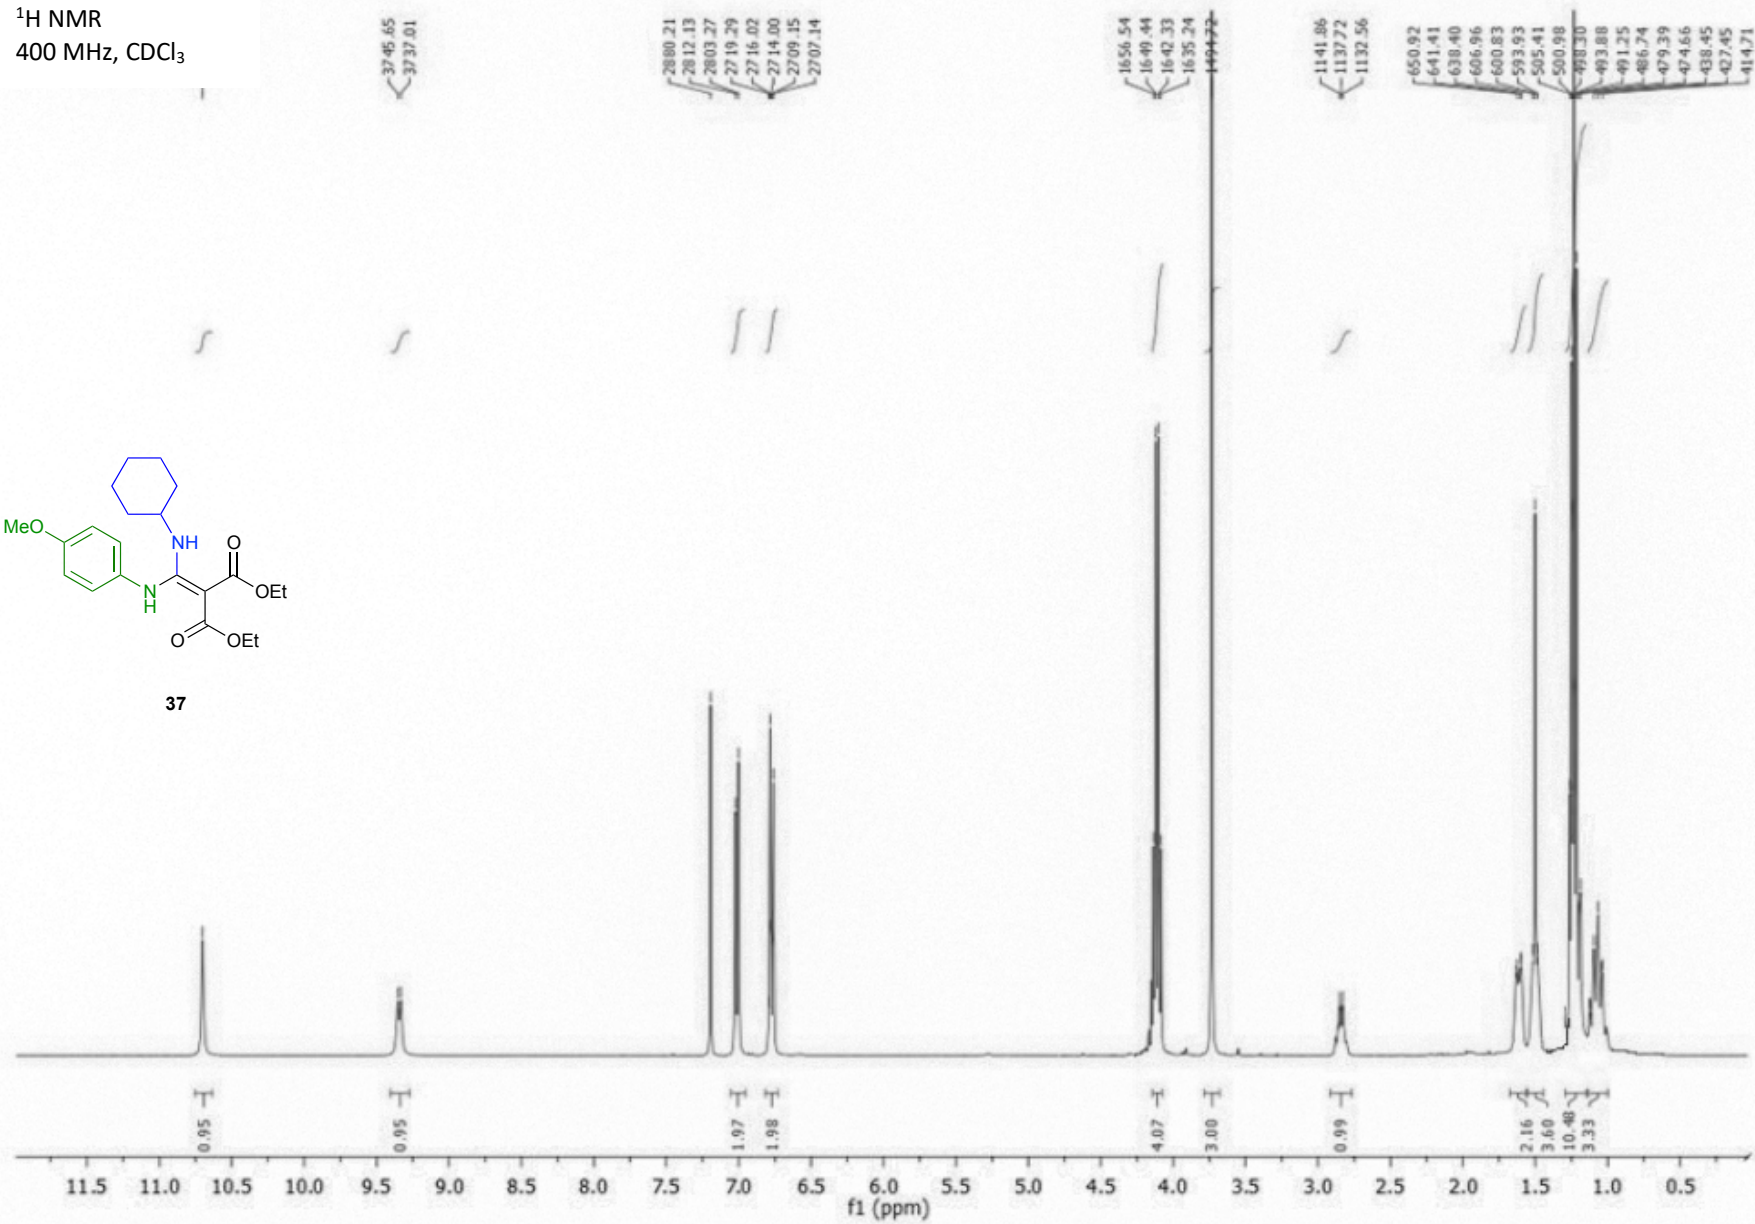

<sup>13</sup>C NMR  
100 MHz, CDCl<sub>3</sub>

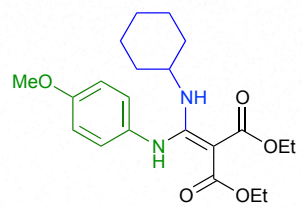

37

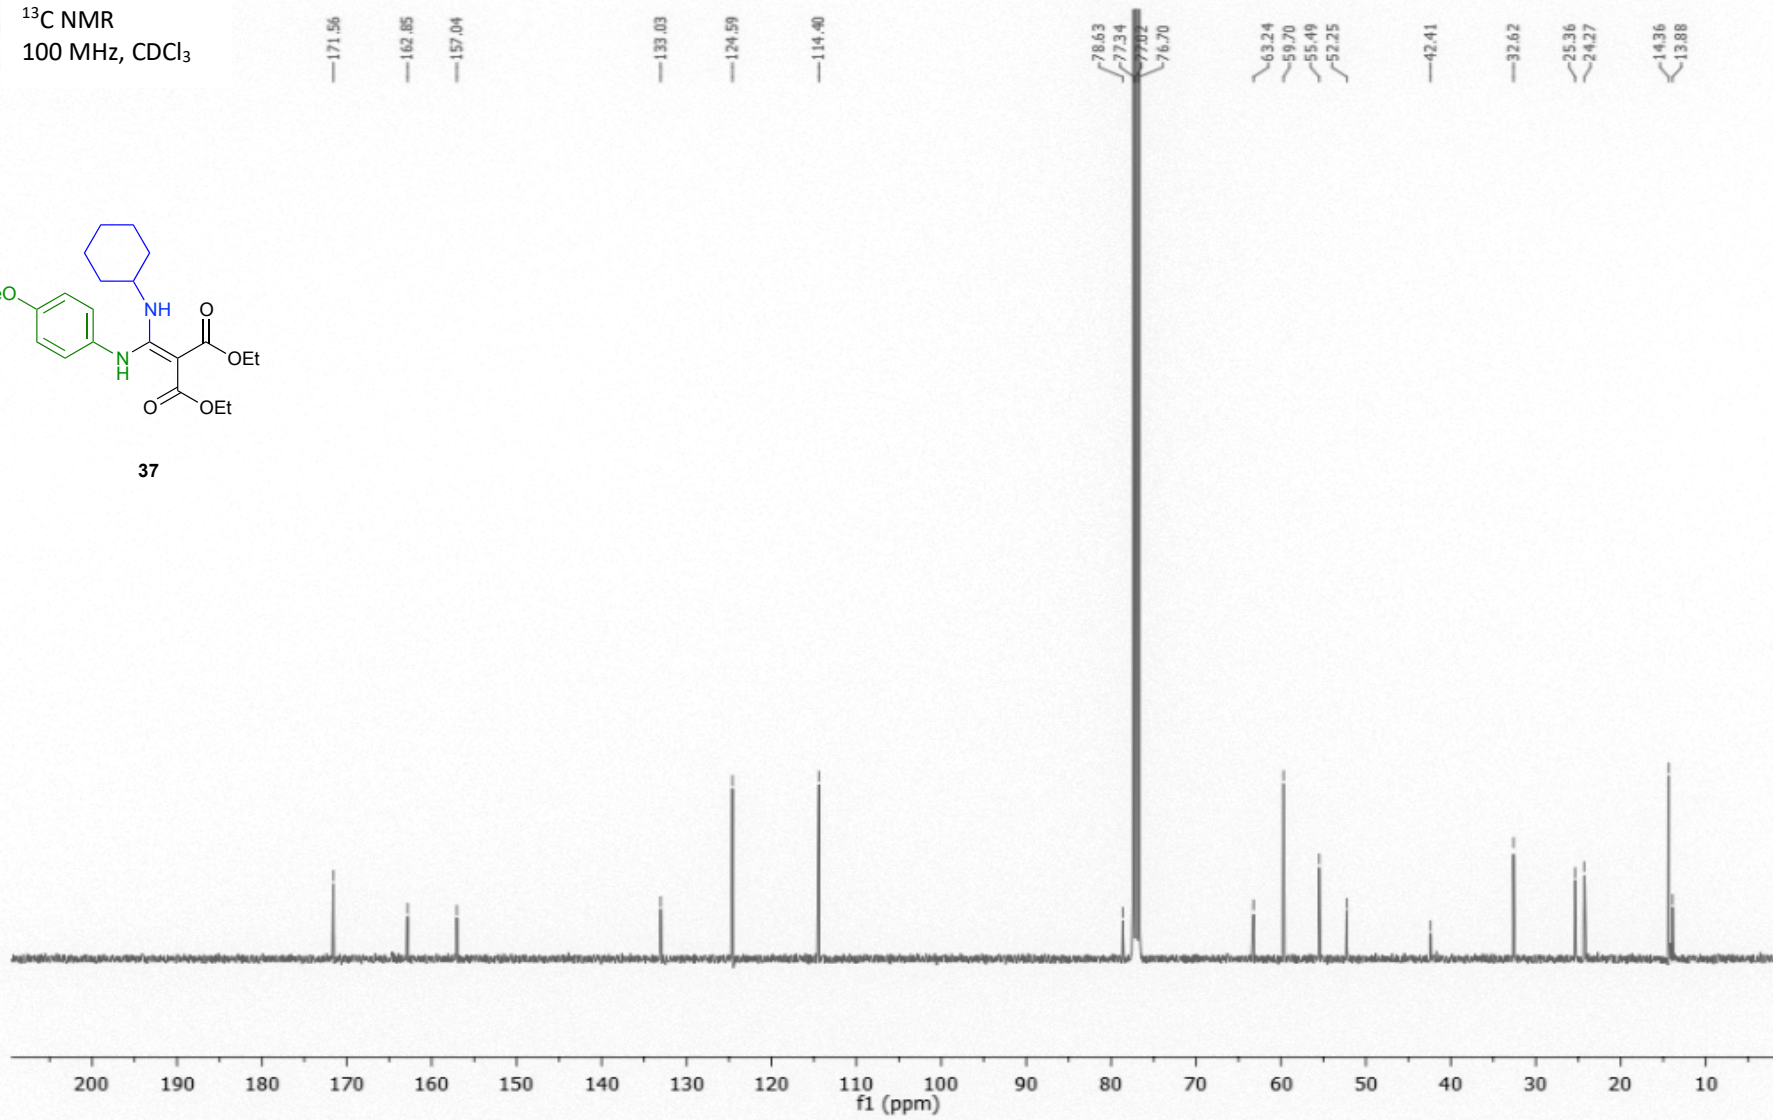

<sup>1</sup>H NMR  
400 MHz, CDCl<sub>3</sub>

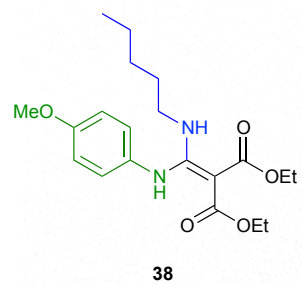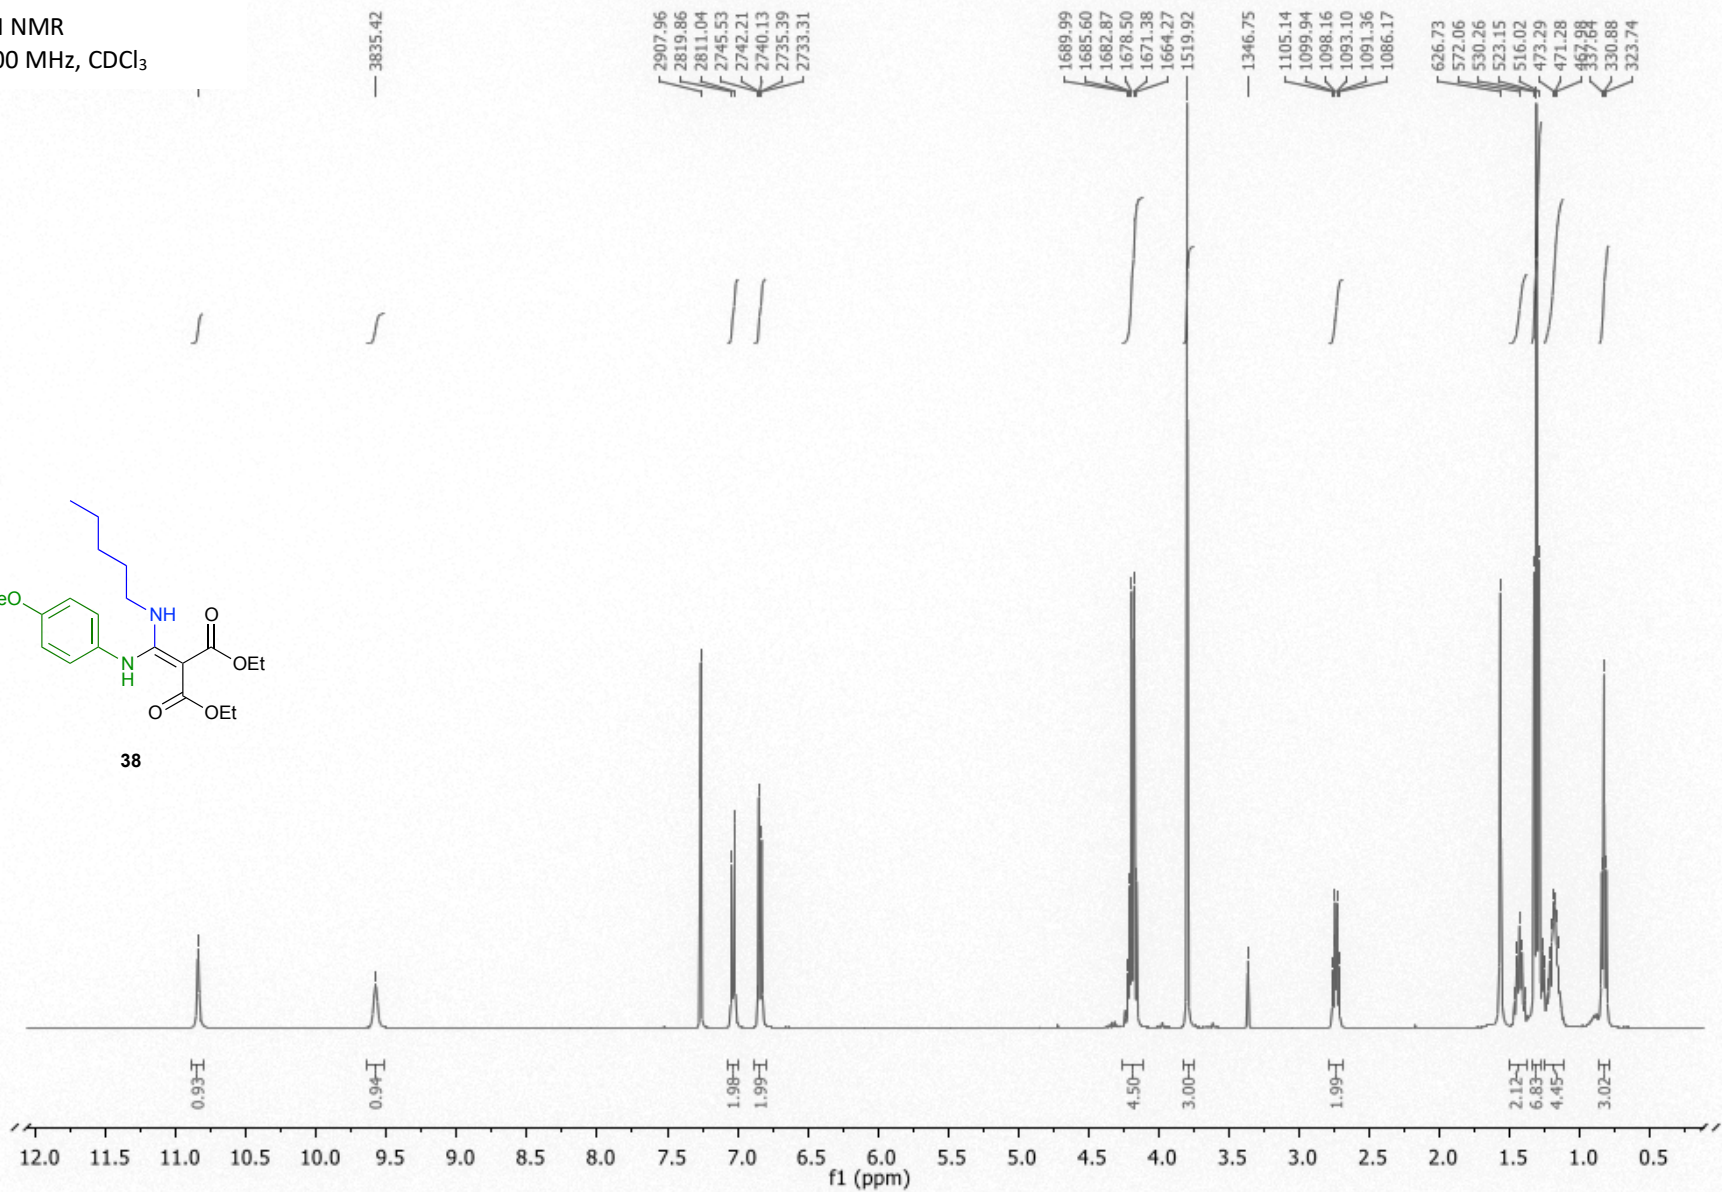



<sup>13</sup>C NMR  
100 MHz, CDCl<sub>3</sub>

— 171.54 — 163.56 — 156.77 — 132.97 — 124.53 — 114.36 — 78.13 — 77.34 — 77.02 — 76.70 — 59.72 — 55.48 — 45.37 — 29.45 — 28.81 — 22.16 — 14.36 — 13.88

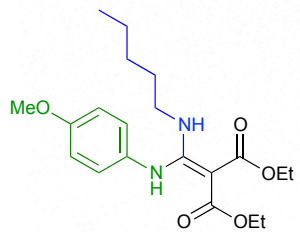

**38**

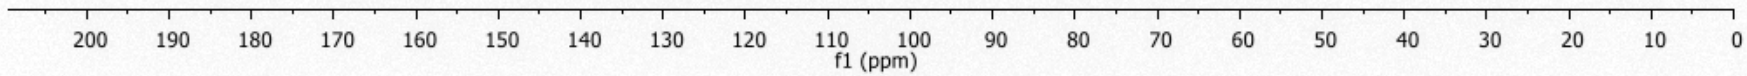



<sup>1</sup>H NMR  
400 MHz, DMSO-d<sub>6</sub>

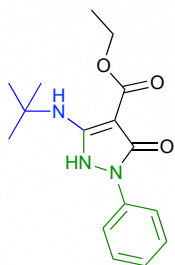

39

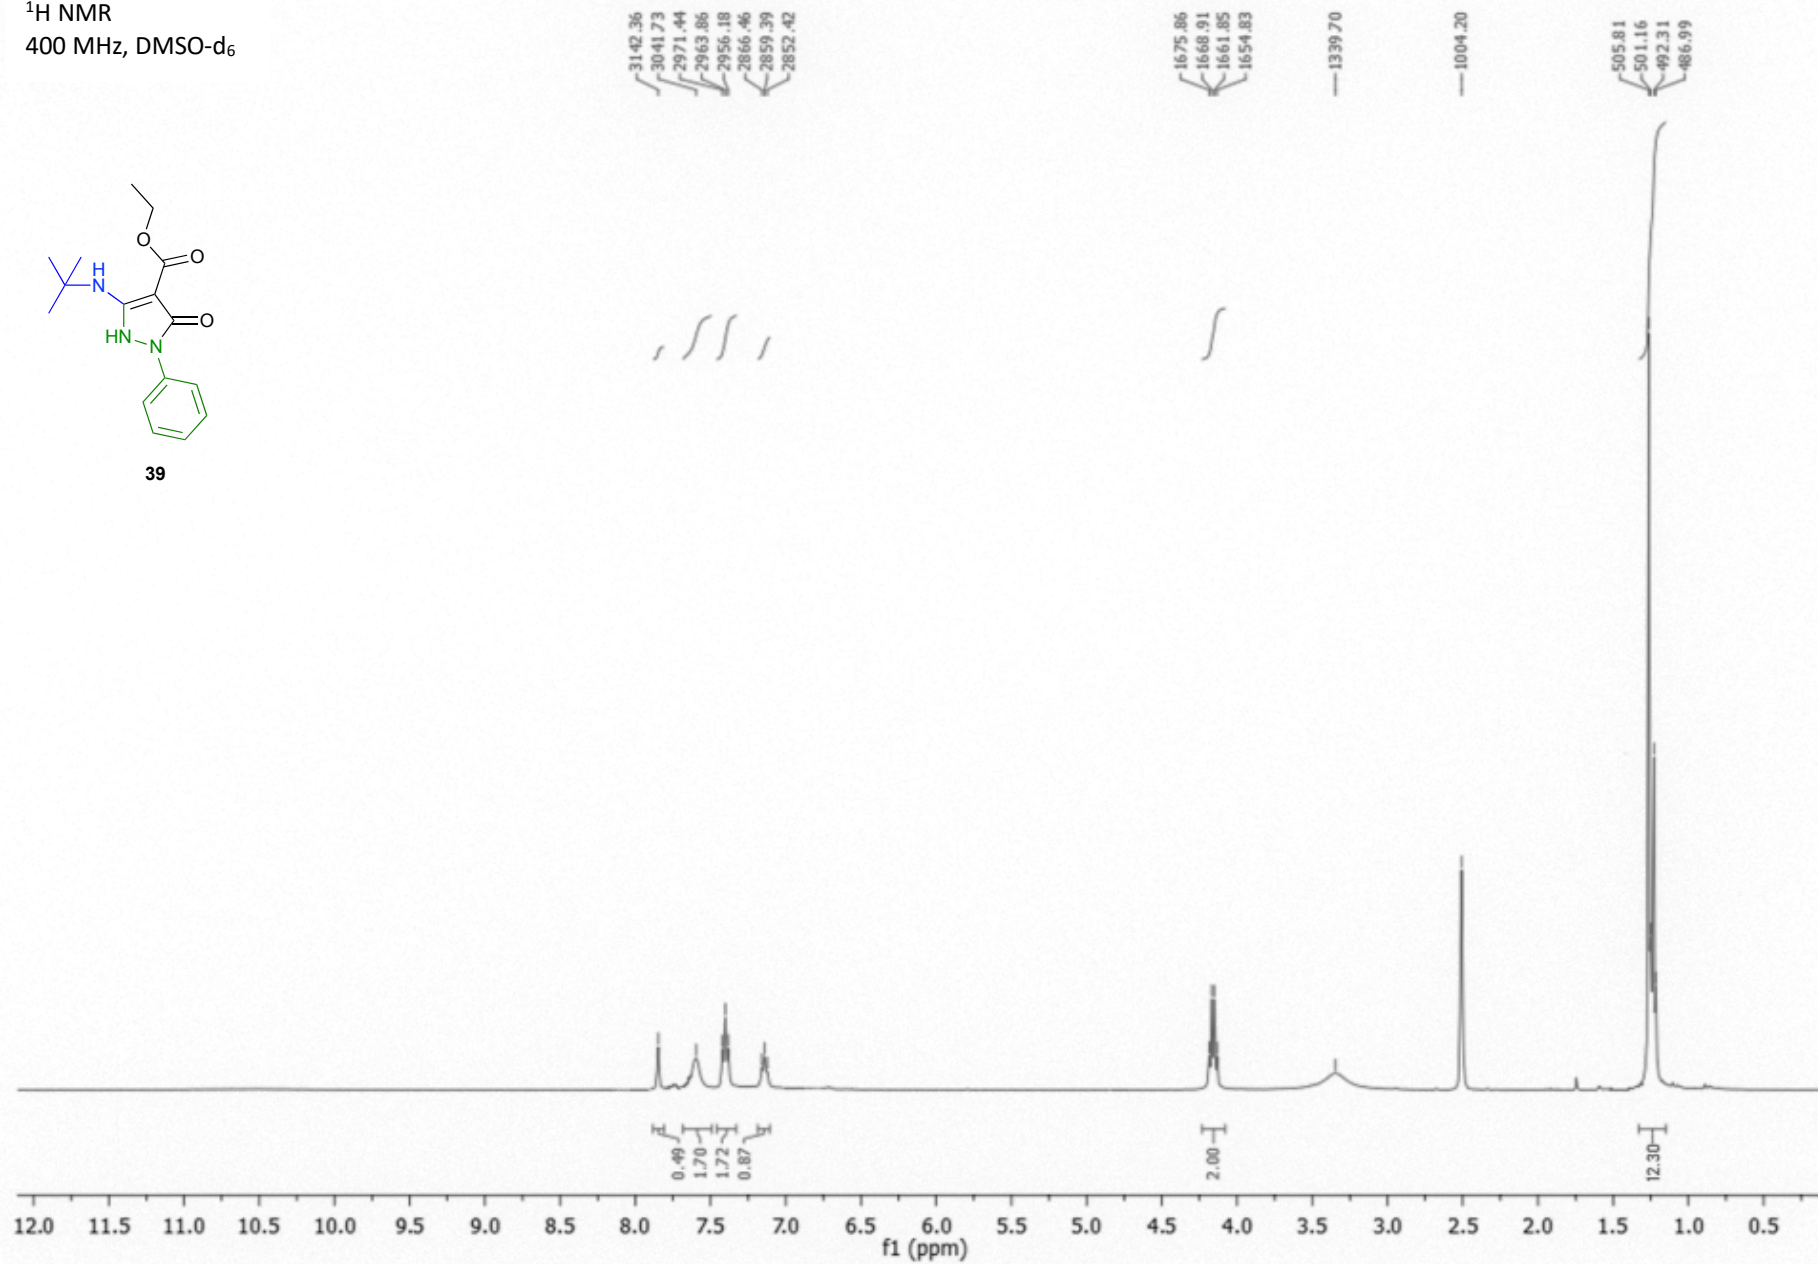

<sup>13</sup>C NMR  
100 MHz, DMSO-d<sub>6</sub>

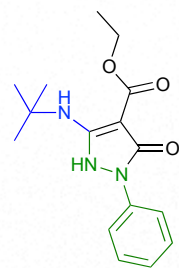

**39**

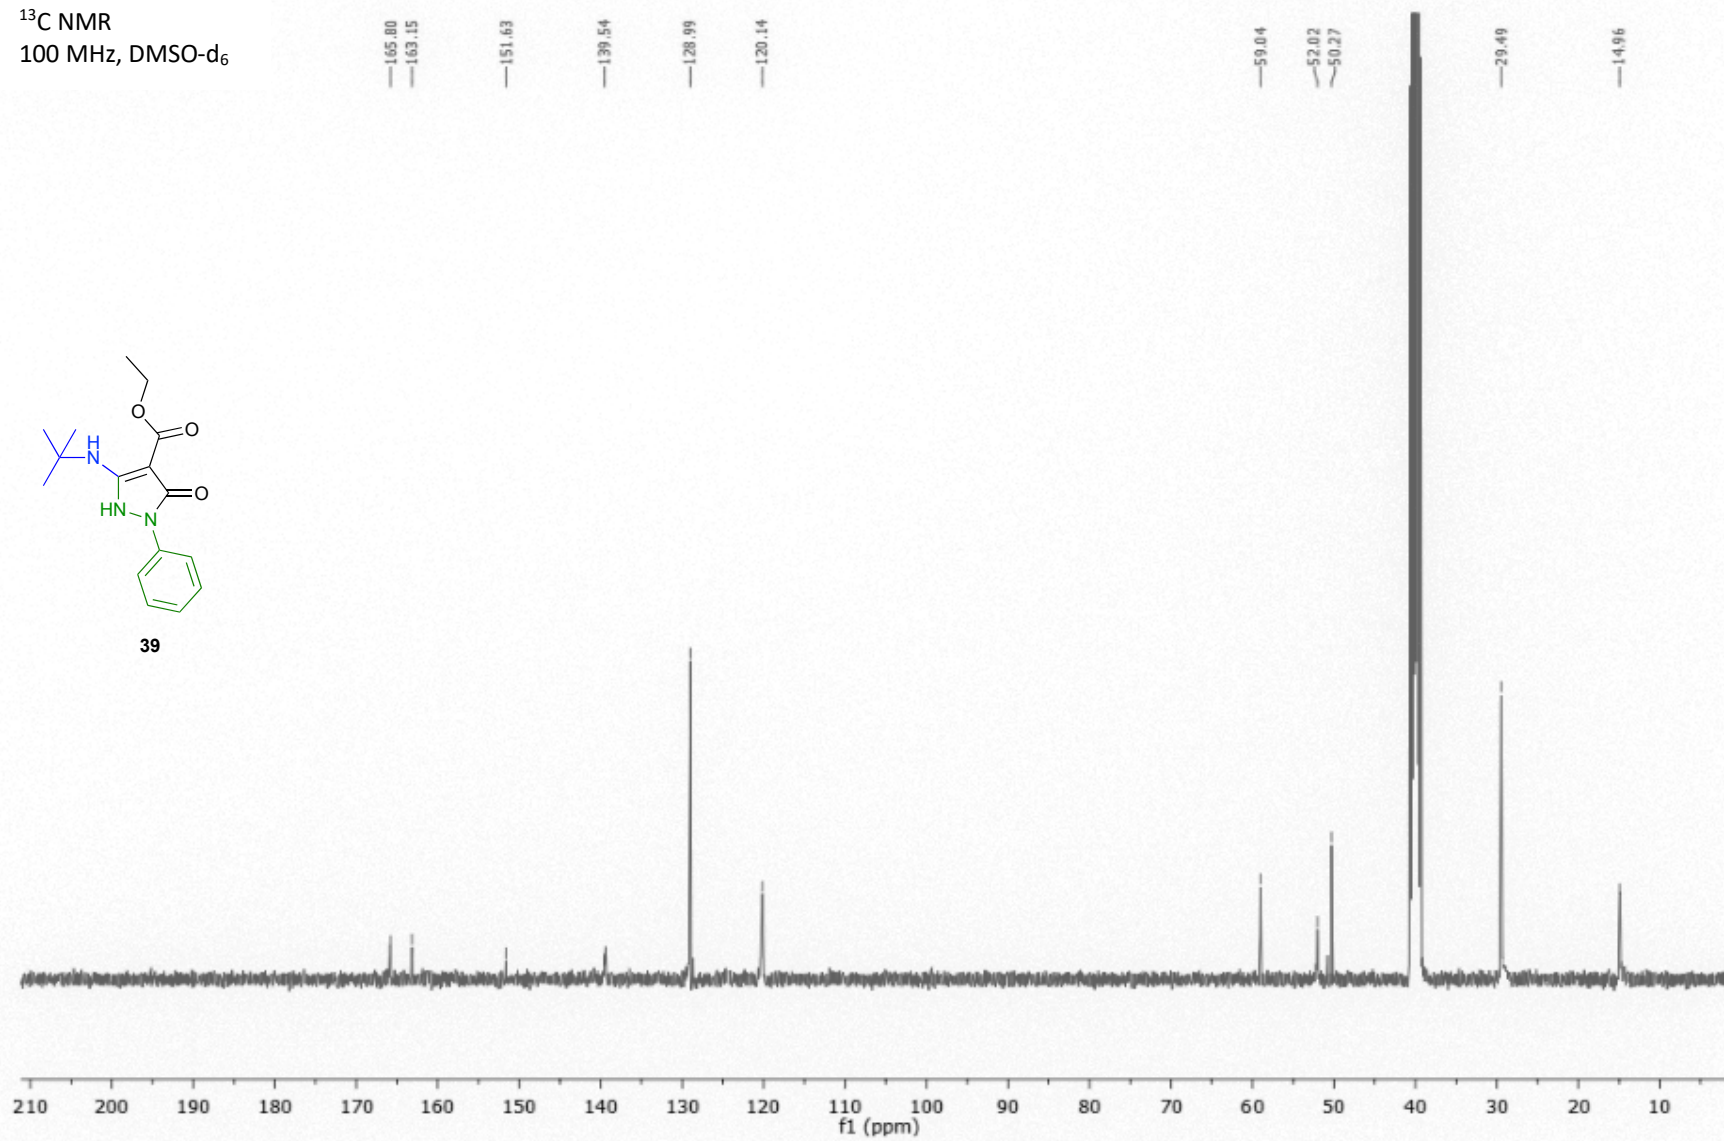

$^1\text{H}$  NMR  
400 MHz,  $\text{CDCl}_3$

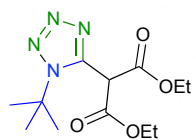

40

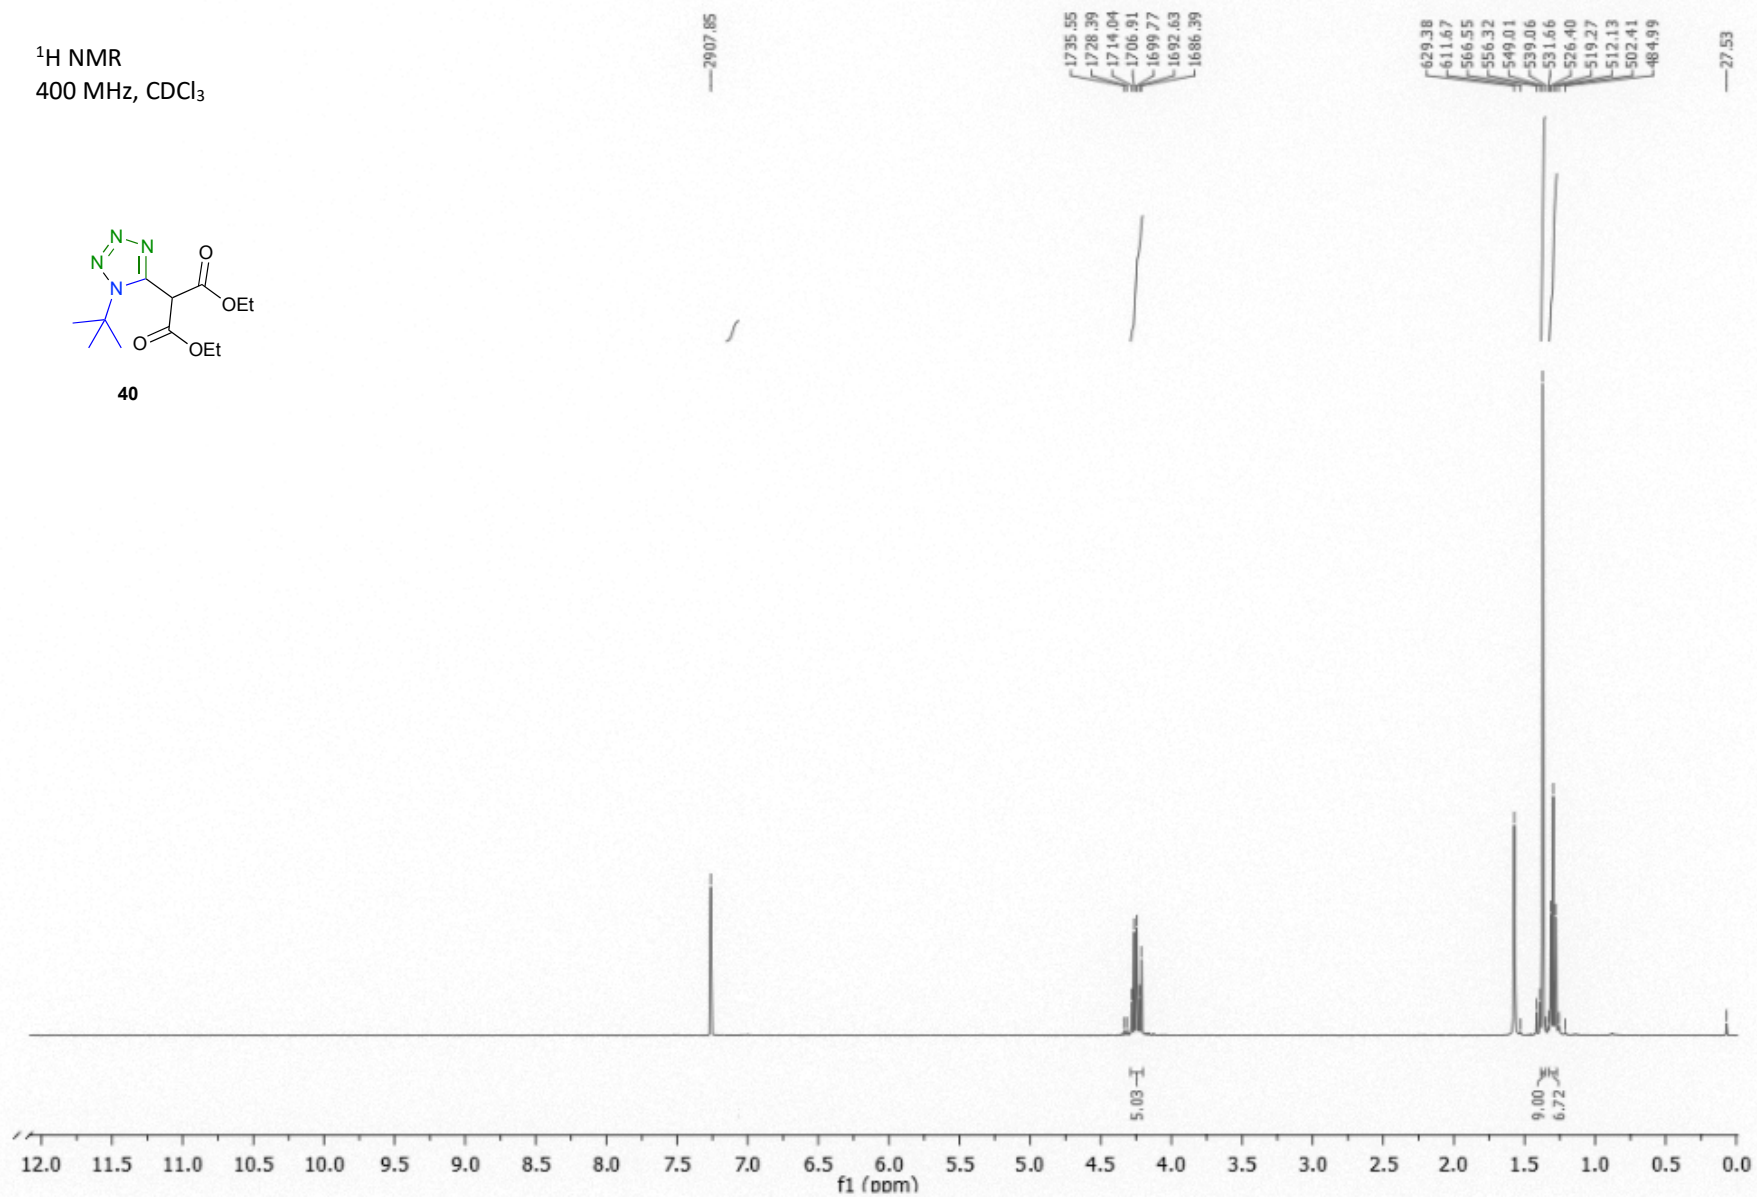



<sup>13</sup>C NMR  
100 MHz, CDCl<sub>3</sub>

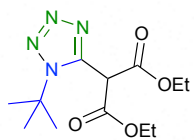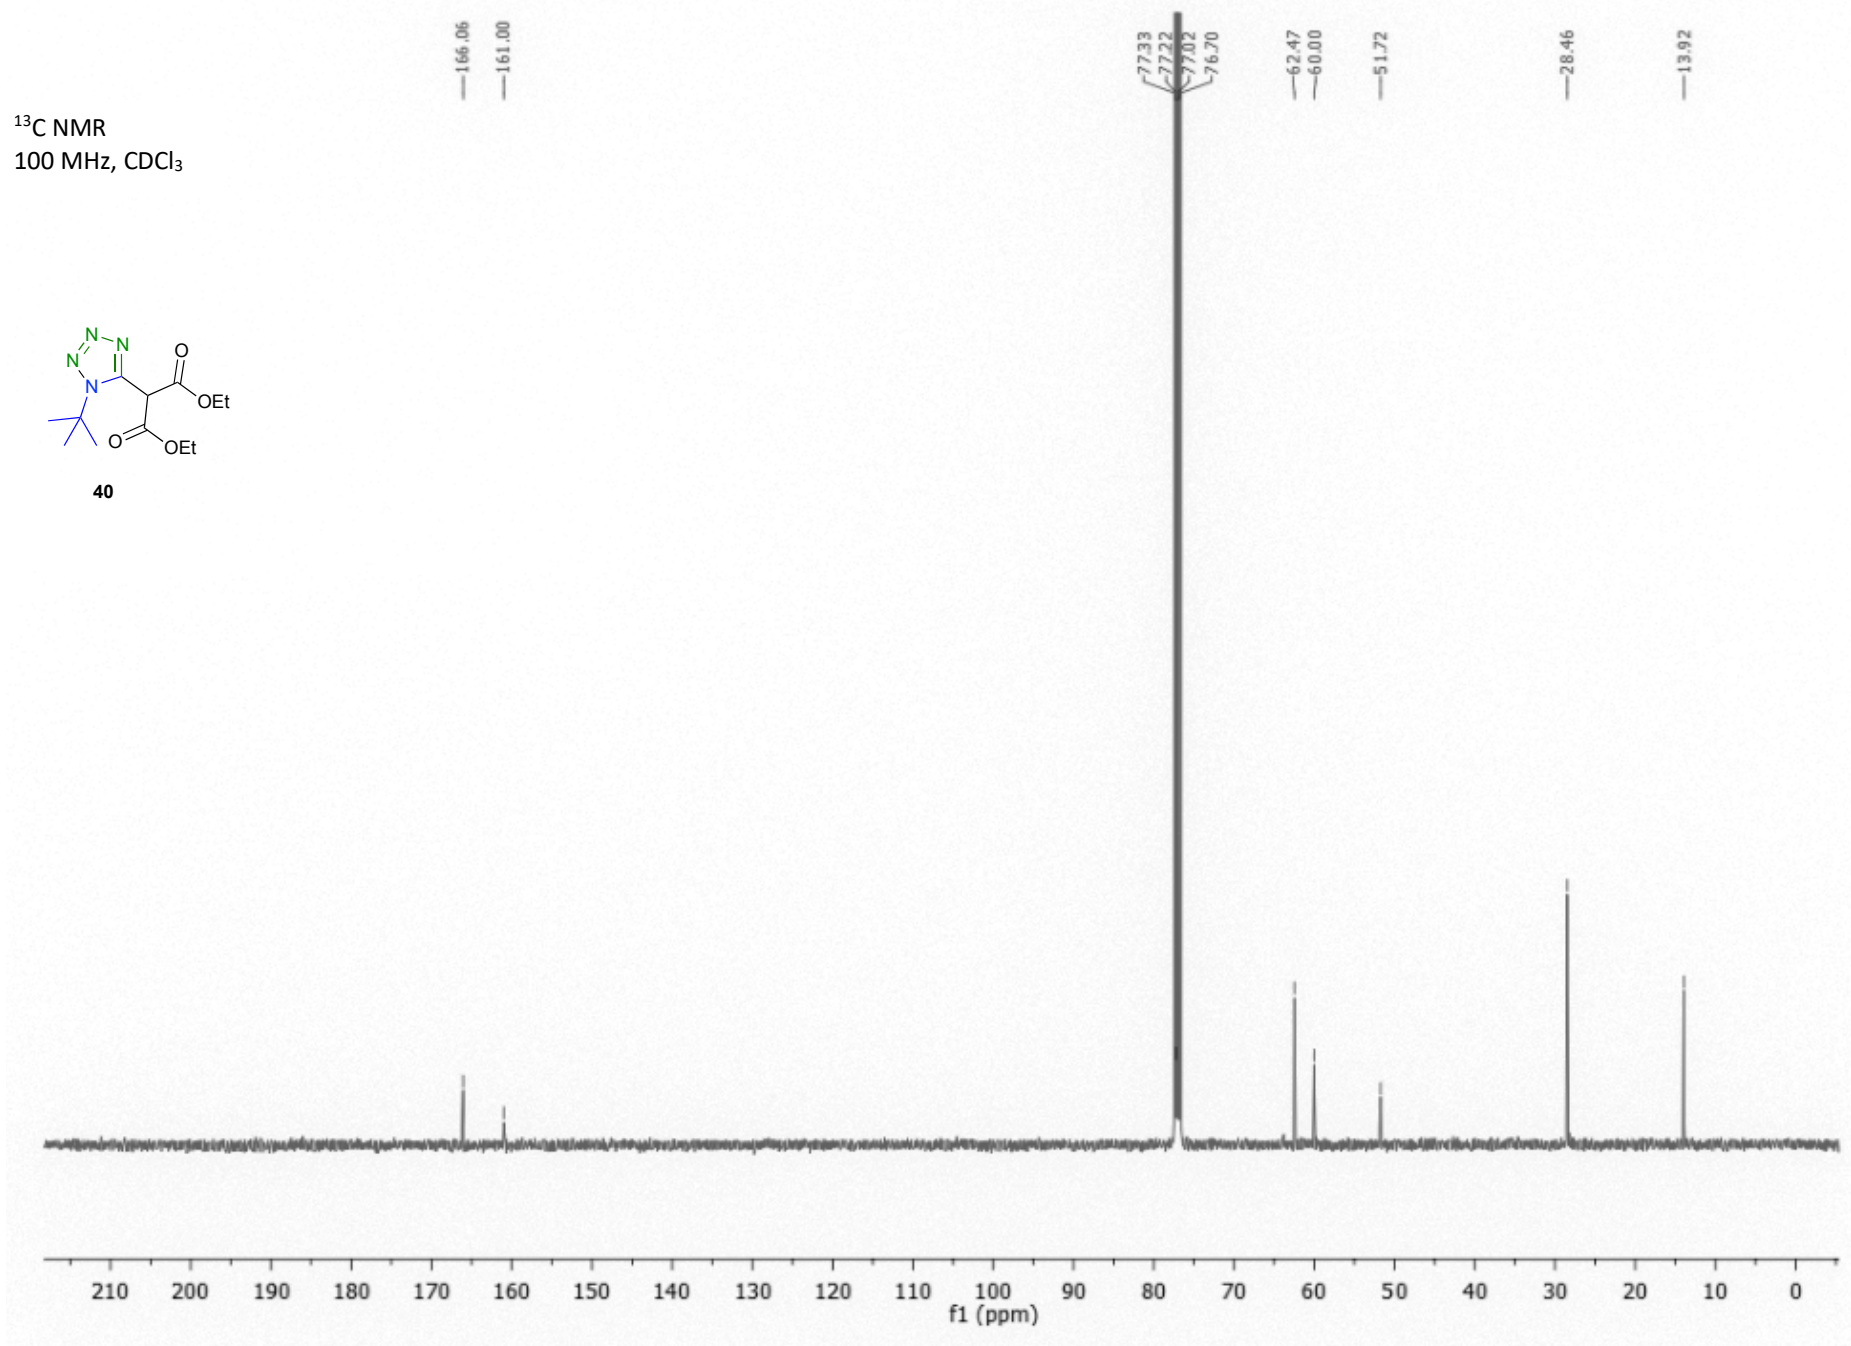

Supplement: jo0c01946_si_001.pdf [file jo0c01946_si_001.pdf]
